# Supplementary material for: KRAB-zinc finger protein gene expansion in response to active retrotransposons in the murine lineage
Source: eLife. 2020 Jun 1;9:e56337. doi: 10.7554/eLife.56337 (PMC7289599; doi:10.7554/eLife.56337)
Supplement: Figure 1—source data 1. — Mean values of replicates are shown as log2 transcripts per million. [file elife-56337-fig1-data1.xlsx]

## Sheet: tpm_zfp.averaged_replicates
GeneName	ZNF_coordinate (mm10)	adrenal gland	brain	central nervous system	cerebellum	CH12.LX	colon	common myeloid progenitor	cortical plate	embryonic facial prominence	erythroblast	ES-E14	forebrain	frontal cortex	G1E	G1E-ER4	gonadal fat pad	granulocyte monocyte progenitor cell	heart	hematopoietic stem cell	hindbrain	intestine	kidney	large intestine	limb	liver	lung	megakaryocyte	megakaryocyte progenitor cell	megakaryocyte-erythroid progenitor cell	MEL cell line	midbrain	neural tube	ovary	placenta	skeletal muscle tissue	small intestine	spleen	stomach	testis	thymus	urinary bladder
1700049G17Rik	7:27909948-27911998:-	4.45688	5.73367	6.44806	4.42702	4.23916	1.27835	3.56537	4.06579	7.517	0.42112	3.1395	10.837	4.70076	1.30274	0.591618	3.8326	3.53012	7.09726	9.48316	9.34806	5.77642	6.4153	2.03215	7.48749	2.65712	6.3383	5.57141	1.96846	1.15573	3.03579	10.3053	9.58657	5.23142	2.59393	4.47023	3.71587	2.23767	5.9036	16.3763	2.279	5.85114
2010315B03Rik	9:124292746-124294064:-	5.3929	8.40052	8.37186	12.0833	9.31742	3.27873	16.7078	12.533	4.88432	0.21056	1.13618	7.05467	12.5229	13.1149	13.72	5.75622	12.3405	8.84085	24.9662	6.9612	14.4108	9.00954	9.56147	5.07353	10.8274	7.67427	16.9604	12.9603	10.5575	5.65019	7.76764	6.36688	8.75226	7.32669	12.2033	46.1255	6.90094	9.43572	0.441044	8.03154	17.3153
2210404O09Rik	17:21879882-21880699:-	5.03313	3.50505	4.17754	1.69811	0.0292819	1.01273	6.89634	3.0263	5.75428	0.361412	5.44061	8.23015	3.25877	6.76216	2.38104	0.933631	8.26506	4.03635	3.56692	5.80161	9.83224	5.18342	1.60698	5.26462	2.92988	4.58416	15.4361	8.65907	1.20879	0.0575364	6.58144	5.68649	6.16552	3.88199	4.26859	23.4602	2.17716	5.92046	0.599471	9.07443	5.21198
2210418O10Rik	2:176236906-176237707:+	9.91244	3.4777	4.47026	2.7014	15.6592	0.151384	22.0276	3.65317	7.42419	0.10528	25.7581	6.96881	2.1837	16.3213	11.4971	0.671129	37.9448	5.93869	28.5725	4.99052	8.45308	6.49822	0.254286	5.4715	7.14942	7.6632	2.29848	20.0977	9.7813	8.43022	7.15685	4.68745	7.9359	3.96237	6.6901	9.4385	4.00296	6.61103	0.100931	4.59198	14.309
2410141K09Rik	13:66429537-66432194:-	0	0	0.00606131	0	0	0	0	0	0	0	100.608	0	0	0.114306	0.0172456	0	0	0	0	0.00453114	0	0.00347581	0	0	0	0	0.0267845	0	0	0	0	0	0.394636	0.0851657	0	0	0	0	2.02575	0	0
2610008E11Rik	10:79066581-79067913:-	6.20176	15.0099	17.1122	7.98081	3.22434	0.624602	14.8777	9.01793	22.4012	0.571972	6.00673	25.5997	15.084	5.1381	3.15713	1.69061	8.06093	12.6106	21.1175	21.8657	12.3877	12.0252	1.29452	22.8083	5.60881	14.2364	7.66307	7.91748	6.58014	4.57734	26.3369	22.6233	24.9382	5.14161	10.8832	7.68943	3.84206	10.3329	0.845924	6.39628	14.1846
2610021A01Rik	7:41626032-41627550:+	2.38585	6.80319	6.9504	7.44701	18.7453	0.676227	20.702	6.24704	7.92018	0.120471	27.3511	9.38771	5.90881	25.8551	14.366	1.94636	15.6249	4.92989	20.2904	7.22969	6.06431	6.21006	1.36055	7.75654	6.97915	5.28074	9.4367	19.2193	14.6279	7.49613	8.60796	7.42286	8.7204	3.65053	3.83988	11.5214	3.15046	4.43859	2.18235	5.3546	4.2369
2610044O15Rik8	8:129218964-129220459:-	17.8733	8.27247	10.4535	11.4882	16.052	0.665478	24.0808	11.5128	19.3133	1.33931	14.9278	19.3128	10.7092	11.232	7.93799	5.07432	16.1171	18.4804	21.0945	15.7407	16.4161	17.0416	3.6365	18.1348	11.8576	16.1131	13.4944	17.6086	11.8333	13.2282	19.5895	17.2456	13.7926	10.8655	39.396	13.6222	10.5491	14.7437	1.68164	18.0911	22.2113
2610305D13Rik	4:147612909-147613476:-	3.44128	0.616932	1.03498	1.38216	23.0855	0.0069435	5.00469	0.249026	2.048	0.571972	97.1499	1.276	0.675787	0.192603	0.266597	0.34434	3.70522	3.94216	7.78918	1.75736	1.96927	2.78558	0.0569604	1.93802	4.57108	2.86819	0.498604	3.91973	0.910755	11.9746	1.72996	1.88007	10.7688	1.39219	2.4425	1.26211	2.47927	1.38373	1.5535	0.848756	2.07123
2810021J22Rik	11:58880422-58881289:+	3.15105	6.74211	7.1178	5.02852	4.57756	2.61511	6.49105	4.06263	6.51457	1.12875	4.6952	7.50152	4.90418	2.13211	0.598734	7.82919	2.64303	4.15452	1.34793	7.37516	4.87791	5.80162	2.88287	6.55138	4.22706	4.85953	3.18204	2.9889	3.5891	8.54906	8.48905	7.61357	4.82955	4.75175	2.81082	3.43606	4.81251	4.49531	8.19008	10.2803	4.13034
3110052M02Rik	17:21661715-21662534:+	1.85667	7.16282	6.2042	4.70027	1.97421	0.335721	4.30658	4.39102	4.57297	1.86571	0.920228	7.4805	4.61236	8.27339	4.67357	0.56095	1.12032	3.39462	3.07407	7.2485	3.53491	2.51226	0.882454	4.36089	2.85111	2.36694	9.72255	7.75697	2.18113	2.23798	8.09304	7.64871	5.22374	2.108	2.18967	8.68703	1.40806	2.93487	0.122359	3.55389	3.04556
3300002I08Rik	2:150341792-150343115:-	4.51473	3.42317	3.70667	2.76503	5.06415	0.983193	6.8003	2.50883	6.45819	0	9.32499	10.0676	2.86495	0.184942	0.31708	2.46603	3.22983	4.21081	4.74918	9.2591	4.3738	5.70659	1.8338	6.59706	2.14703	4.86284	6.29984	3.25246	1.46334	0.0214268	9.31495	10.3423	4.08388	2.09512	3.76631	6.12806	1.15306	4.12686	1.38838	2.80432	3.611
4930522L14Rik	5:109736010-109737678:-	34.0363	1.55638	2.93587	2.49764	19.6352	1.30287	12.9805	1.2793	6.41969	0	9.93827	4.32041	1.59648	16.8541	7.56662	3.11757	13.1165	4.45543	15.2885	3.40599	10.9769	8.19709	3.78356	7.07124	7.24364	7.57285	17.1896	17.4017	7.61291	7.0577	3.6175	3.74638	8.82653	10.7359	5.31777	5.52833	6.78272	8.84262	1.09112	10.7247	9.40873
5430403G16Rik	5:109674982-109677351:-	2.98575	0.481212	0.669136	0.806369	5.92133	0.0480161	1.95319	0.699241	1.96539	0	3.537	1.21178	0.851809	8.37546	2.96618	0.214026	2.21796	0.934897	2.80464	1.14917	2.37194	2.06248	0.241573	2.11948	1.03948	1.60001	1.80682	3.99867	1.45461	2.29373	1.19306	1.2975	3.81884	1.66444	0.493662	0.889786	0.843248	1.875	0.0432423	1.16846	1.9466
5730507C01Rik	12:18533450-18534516:+	1.35977	0.37987	0.484428	0.132773	0	0.0208305	0.0184227	0.061248	4.22997	0	2.65729	2.82928	0.0069475	0	0	0.0926281	0.329272	2.4721	0.156343	3.91759	4.2807	4.22689	0.188446	5.25491	0.895128	3.08109	0.0642434	0.515141	0	0	3.00614	5.16174	2.06389	3.50341	0.978123	0.240439	0.510462	2.59456	0.122841	1.39933	1.60583
6720489N17Rik	13:62604182-62605169:-	3.13797	0.862708	2.37514	0.160766	7.44376	0	15.5119	2.07072	10.8674	0	5.92615	7.68052	1.36578	0.097905	0	0.297296	14.6285	6.55268	25.4451	5.00118	6.5849	7.82174	0.326624	9.36422	3.40832	7.69366	16.7372	10.7536	4.33704	6.98199	7.14357	6.10493	1.04686	1.15882	4.1634	0.636268	2.1325	6.22309	0.152698	2.24402	5.38755
9130019O22Rik	7:127384395-127385469:-	2.86925	3.38106	2.53303	2.82818	4.8936	5.68308	4.90827	1.91414	4.39909	0.451502	3.62782	3.34358	1.74324	4.8435	3.98585	5.6961	3.37344	3.85952	5.66116	3.17955	5.91915	4.25102	11.1125	4.38549	2.72378	5.44763	3.03873	2.82199	2.6193	2.43018	3.72006	3.61054	3.42512	1.75594	4.79312	9.7266	4.06914	4.30048	0.440755	5.56349	3.73574
9830147E19Rik	7:42611696-42614018:-	0.793518	1.44141	1.60384	0.841127	0.0203689	0.240669	8.61161	0.986881	2.04546	0.346222	14.7558	1.98716	1.21778	4.01513	1.91281	0.30723	5.80566	1.69213	9.46436	1.53794	1.90811	2.51958	0.345791	2.48411	2.04994	2.61454	0.815179	6.68981	5.9278	0	1.5986	1.59111	4.39849	2.72561	0.937218	3.53461	0.720352	2.09219	0.636213	0.565501	1.89114
A430033K04Rik	5:138646634-138647873:+	2.47204	9.79436	9.53278	8.51506	6.79625	1.56331	12.1311	6.84894	10.035	0.436311	1.5839	13.0301	7.73665	5.66091	2.95334	2.29112	8.03243	6.3695	14.1622	10.8143	7.19165	7.16626	1.86471	10.9166	6.26046	7.75213	3.72271	7.08564	9.52044	3.41442	11.9031	12.0286	7.34941	3.59065	5.5609	2.26781	4.01642	6.80734	0.303178	5.12308	5.25474
AI987944	7:41374365-41375334:-	5.1012	2.00216	3.11717	5.05282	11.1746	1.5282	13.4552	4.26164	5.66383	0	8.82383	4.71414	3.98799	12.231	10.3687	2.40836	13.8143	7.06358	15.0904	4.23079	7.67675	6.88341	3.23884	5.40005	8.18079	6.48346	14.0205	12.402	6.26599	1.15179	4.28599	4.36365	11.0936	4.82246	7.90229	10.2423	5.02029	5.91241	13.0692	6.51207	8.53389
AU041133	10:82150835-82152069:+	4.12856	1.53836	1.96702	2.01134	3.76481	0.0624915	7.57954	1.719	4.66722	0	5.63087	6.47536	1.50966	7.75237	2.48138	0.283213	3.52083	4.3117	4.99634	5.45273	4.81978	4.55096	0.169668	4.29083	2.25671	4.15688	3.57671	4.64577	1.79815	3.60068	6.68306	6.42219	2.63955	2.65596	3.82052	2.70167	2.04166	3.91808	0.108491	4.23542	3.38581
AW146154	7:41480307-41481459:-	1.59688	1.2868	2.14741	1.71802	2.4769	0.54685	6.65371	2.65396	2.66557	0	3.29608	1.8281	2.8734	4.90361	3.08506	1.22014	4.96993	2.54628	7.02853	1.45967	3.33193	3.39612	0.955376	2.92983	2.59294	2.85699	2.92025	5.40118	3.85254	2.77934	1.52592	1.56575	3.12249	2.44153	2.50549	5.54653	1.61538	2.73339	0.317817	2.52661	4.35304
B230307C23Rik	16:98009839-98011049:+	24.718	5.14347	4.31634	2.57599	25.7537	0.654141	20.6604	3.64846	19.7847	0	20.3543	15.6875	10.9714	28.647	18.9943	1.35132	43.4594	14.5725	56.7322	12.7614	28.1166	17.1041	1.9158	17.1287	20.8786	14.9599	40.3025	52.4349	24.8207	26.0949	13.1596	15.7392	7.27493	7.41801	20.1931	17.1464	19.9309	19.4813	1.32545	25.8928	14.1894
C030039L03Rik	7:27702264-27705322:+	2.30461	5.12089	5.79407	3.35898	1.22971	0.172215	0.62833	6.27926	3.68286	0	6.36021	7.79968	5.24757	2.32141	0.924618	0.67473	3.27137	2.56116	1.29535	6.87778	2.51458	2.95361	0.219352	3.12725	1.32932	3.35123	2.50237	2.2345	2.54456	3.16537	8.73915	6.35303	1.30847	1.44065	3.65489	0.706062	1.50067	2.52627	41.8217	2.31823	2.88707
D3Ertd254e	3:36164861-36166175:+	2.19906	3.959	4.00044	3.94605	4.33089	0.643079	4.92708	4.03184	6.47947	0.346222	8.95246	9.18407	3.90536	7.30619	4.30823	1.74843	4.22426	4.06117	6.16977	8.84756	4.14024	4.80739	0.887305	6.80521	2.05882	4.97503	3.67828	5.52945	4.18908	4.81858	9.63441	9.01228	5.73969	2.08733	3.39813	1.77991	1.49165	4.04741	0.505618	2.75812	3.39376
E430018J23Rik	7:127391568-127392306:-	8.04077	7.18722	4.77613	3.66546	9.05287	12.5159	8.65708	4.81034	4.91446	0.94752	2.52299	4.55899	3.76103	6.5986	9.16155	11.166	2.69928	4.57268	5.73537	4.48292	8.07049	5.98381	18.3875	6.01969	4.96119	5.51713	1.06017	1.8919	8.8745	3.27345	4.16806	4.07945	6.75742	3.1795	5.94933	14.1007	5.91979	5.84416	8.24249	6.72765	5.21071
Etohi1	2:178032840-178034492:+	14.5082	3.92049	5.7649	10.6802	13.1753	0.570623	16.277	7.66737	8.89904	0	22.5937	8.19587	7.56521	63.8812	38.0177	2.57376	44.5203	15.1711	28.3776	8.30076	10.8768	8.16355	1.89984	8.2273	8.56446	9.087	181.849	49.0641	23.2839	44.2058	7.96818	8.08797	16.7459	6.02924	9.1124	14.2736	4.48698	9.07124	0.310835	6.15966	14.5936
EU599041	7:43225916-43226824:+	0	0	0	0	24.39	0	0.039981	0	0	0	33.018	0	0	0	0.00809512	0	0	0	0	0	0	0	0	0	0.00441375	0.00747624	0	0	0	0	0	0	0.134422	0.601969	0	0	0	0	0.143884	0	0
Gm10323	13:66852107-66852923:-	0	0	0	0	0	0	0	0	0	0	2.62917	0	0	0.0067527	0.00809512	0	0	0	0	0	0	0	0	0	0	0	0.053569	0	0	0	0	0	0.142568	0.0323851	0	0	0	0	0	0	0
Gm10324	13:66121249-66123834:+	0	0	0	0	0	0	0	0	0	0	37.71	0	0	0.0892816	0.0299552	0	0	0	0	0	0	0	0	0	0	0	0	0	0	0	0	0	0.839116	0.282011	0	0	0	0.00141878	0.477111	0	0
Gm10778	10:81663046-81664201:+	1.56313	2.41627	2.42014	2.69728	5.62614	0.273425	4.57744	2.18536	3.66486	0.225751	4.69528	4.01021	2.0598	5.50621	2.47315	0.425602	5.24217	2.97237	5.81595	3.69367	3.14713	3.15865	0.557476	3.35858	2.62249	2.85336	4.32911	5.86578	3.6666	4.06118	4.11771	4.66955	3.76402	2.57413	2.3576	2.96704	1.66789	2.82179	0.499022	2.78777	2.73003
Gm11007	2:175652594-175654066:+	0	0.596833	0.270772	0	0.0313885	0	0.0184227	0.0140066	0	0	0.0563241	0	0.00980287	0.0273849	2.97602	0	0.0916136	0.00466893	10.6537	0	0.0957929	0.0367937	2.32596	0.037531	0.652907	0	0.0134351	5.29177	0	0	0	0.000658337	0.30143	0	0	1.43458	0.060035	2.16073	0.0502244	0	0.00910321
Gm12258	11:58858744-58860331:+	2.67926	18.2459	19.1538	16.0685	2.785	1.94967	1.55181	13.8744	8.37876	0.120471	3.54635	12.9367	14.3379	7.08299	2.7056	5.08297	3.67182	4.38787	3.81408	12.4736	4.98864	5.53532	3.51754	9.15976	4.44813	5.93521	3.23103	1.42783	3.13481	5.04322	13.6258	13.6287	2.43863	3.62603	2.72507	2.49765	4.44771	5.3663	1.95568	18.4083	6.82751
Gm13051	4:146124722-146125961:+	0.0426944	0	0.0136672	0.0105802	0.0585638	0	1.34799	0.0268254	0.0393799	0.120471	54.2704	0.0114171	0.0134757	0.0273849	0.0586741	0	1.62431	0.0458542	4.05828	0.0444919	0.409523	0.108813	0	0.0608921	0.225512	0.0442657	0.463294	1.86836	1.47186	0.121943	0.0155449	0.0724257	0.729135	0.411148	0	0.945313	0.183767	0.126564	0.0289889	0.618585	0.0798036
Gm13139	4:147178890-147179865:+	6.20615	1.4437	2.90076	1.21931	2.89399	0.0337369	28.5147	1.13117	5.6443	0	43.4346	3.70989	1.2863	7.91937	2.89314	0.450342	39.8205	5.72386	37.3208	4.18523	8.59859	5.34463	0.271266	6.28883	7.39917	2.33276	57.9708	47.7704	20.786	1.66223	3.71831	4.06336	18.5351	5.68274	3.56735	6.56533	5.00927	4.33271	3.92095	5.1293	7.82561
Gm13145	4:147390771-147392002:+	0.0902302	0	0.0101721	0.0842253	0.296387	0	0.233615	0.0384563	0.0839487	0.240942	229.988	0.0640176	0.0652818	0.145548	0.00589554	0	0	0.161941	0	0.0634251	0.0735298	0.0933959	0	0.103691	0.185997	0.109622	0	0.0887938	0	0.436282	0.0828679	0.071566	0.932804	0.0544492	0.304236	0	0.0561932	0.0364257	0.456744	0	0.110774
Gm13150	4:146989492-146990731:+	0.0111864	0.0474126	0.101184	0	0	0	0.0736908	0	0.0541677	0.42112	102.164	0.0256557	0	0.251226	0.00864354	0	0.270933	0.0172275	0.0223347	0.0449387	0.0119973	0.0620326	0	0.0226064	0.0527463	0.0107788	0	0.0176121	0.00676087	0	0.0429802	0.113248	0.101834	0.185968	0	0.0275301	0.0463343	0.0588839	0.0290853	0.0343811	0.0135404
Gm13151	4:147331833-147332988:+	0.00988047	0.0518529	0.0596165	0.0688754	0.0231465	0	0	0.141724	0.0338889	0	74.5788	0.0600147	0.210456	1.00165	0.29868	0	0.178168	0.0378628	0.280245	0.0851543	0.27339	0.162419	0	0.0761673	0.110241	0.0564722	0.0780033	0.252639	0.227339	0.166263	0.0519829	0.101295	0.0529539	0.101358	0.007654	0.0676894	0.13176	0.11433	0.0795025	0.258844	0.0378837
Gm13152	4:147512496-147514486:+	3.08911	0.808763	1.8267	1.76388	0.207894	0.0208305	20.5405	1.11044	5.49611	0.10528	31.8548	3.01084	2.37238	0.230903	0.0458872	0.481134	11.2513	6.78836	22.046	3.94292	3.34605	4.50085	0.110282	6.65911	3.95917	2.6057	2.38326	15.2222	14.2779	2.5383	4.1608	4.42652	14.0947	2.33402	4.15307	1.38894	2.4499	3.01414	1.82052	1.15386	3.31772
Gm13154	4:147583393-147584212:+	0.10943	0.0270627	0.0365298	0.0367185	0	0	0.138366	0.020416	0.0884685	0	42.2674	0.0536856	0.0539027	2.27441	0.705214	0.0280468	0.393969	0.192406	0.623182	0.0663964	0.364644	0.259748	0.00868485	0.125959	0.150538	0.198036	0.0772334	0.569939	0.570839	0.439966	0.0775663	0.120979	0.142568	0.147155	0.111339	0.114731	0.159737	0.166324	0.00727132	0.393316	0.0543978
Gm13157	4:147754772-147755675:-	5.37386	1.95489	3.26174	2.32232	10.2323	0.1506	37.3709	2.71076	5.58523	0.120471	35.5679	4.48133	2.57694	51.7256	23.9708	0.764628	29.7777	8.67747	38.3958	3.40382	12.7477	6.84962	1.03436	5.76165	8.6032	4.88469	72.621	44.0518	32.7578	2.07484	3.44623	3.5455	18.3764	7.64204	5.28632	22.6112	6.66889	5.52669	0.636791	8.38778	6.89224
Gm13212	4:145622711-145624370:+	1.96774	0.0767177	0.319086	0.0742696	3.10134	0.0484084	17.4404	0.0856976	1.04388	0.436311	16.7581	0.207951	0.107805	0.883999	0.499211	0.135923	15.6365	3.97217	19.3316	0.292514	3.13319	2.14279	0.241573	1.57907	2.97271	0.827041	44.1909	19.7523	11.051	24.0651	0.26136	0.543499	10.9152	0.937504	1.85315	4.86709	3.011	1.31666	0.216501	5.78159	1.16966
Gm13225	4:145537156-145538227:+	0.0228089	0.0315932	0.0446439	0.00539419	0.211736	0.041661	0.338271	0	0.0379604	3.0411	109.102	0.0111755	0.0200039	48.9137	15.0291	0.151453	0.0399562	0.0412254	0.391919	0.0494528	0.150985	0.107646	0.00868485	0.0632146	0.0536365	0.0203854	0.0869926	0.161515	0.100943	0.49447	0.0363082	0.0471064	0.0611007	0.101358	0.007654	0.0991557	0.136828	0.0418806	1.01789	0.283541	0
Gm13235	4:145899494-145899893:+	0	0.108401	0.162931	0.13194	0.0313022	0	0	0.272881	0.00510906	0	14.928	0.025895	0.47081	1.08003	0.429085	0	0	0.00199948	0	0.0129444	0	0.00167244	0	0.00269026	0.00923704	0	0	0.085267	0.00846626	0.0201505	0.0152842	0.0319527	0	0.0463529	0	0	0	0	0.0436279	0.00897785	0.00315539
Gm13242	4:145701458-145703365:+	0.0303867	0	0.0267879	0.015558	0.0381526	0	0	0	0.012035	0	203.491	0.00281702	0	0.0896557	0.0994298	0.0392655	0	0.0127485	0	0.00772852	0.01797	0.0184062	0	0.00794119	0.00967832	0	0.0321217	0.00673229	0.0390798	0.43706	0.00929018	0.0209735	0.757649	0.0388128	0.0237985	0	0.0287622	0.0192684	0.0797917	0.00601034	0.00934517
Gm13247	4:146537339-146538326:+	0.0372859	0.130843	0.14373	0.0688754	0	0	0	0.199532	0.0715315	0	120.363	0.0587892	0.104538	0.317988	0.0219169	0.0224374	0.0231117	0.0716492	0	0.0905497	0.0413776	0.0409454	0	0.0664846	0.0938079	0.042512	0.0401521	0.045101	0.00233555	0.592298	0.0638048	0.118748	0.0932061	0.362974	0.04927	0.0114933	0.0353393	0.0271878	0.701558	0.0376923	0.0715002
Gm13248	4:146657943-146658342:+	1.54839	1.48924	2.45657	0.917873	7.70397	0.27421	21.1323	1.26802	1.70293	0.120471	7.91671	1.30732	1.64171	9.09264	5.41066	3.85163	32.8413	5.079	22.1347	2.12697	4.62338	1.94962	0.819624	2.28977	3.97777	1.21147	54.7229	52.1795	27.3769	0.454496	2.76021	2.34318	6.94728	4.81826	0.684887	2.08461	2.44642	1.22785	26.9355	2.16941	3.90922
Gm13251	4:146466546-146467521:+	2.2632	0.650347	1.18701	0.327362	1.38112	0.239296	12.7747	0.303864	2.58173	0.797723	45.5075	1.56146	0.319404	6.24146	2.7849	0.97951	19.7165	3.41826	15.8597	2.02674	4.07618	2.64336	0.624529	2.95536	4.40408	0.892192	19.1229	17.7279	11.1425	2.31652	1.68726	2.1466	4.90112	3.20505	1.15835	2.05496	2.5366	1.83594	9.00965	2.90637	3.09461
Gm14124	2:150267703-150269530:+	0.0268448	0.0271529	0.0256924	0.0107884	10.0619	0	0	0.020416	0.00602273	0	28.7194	0.0442493	0.0273707	0.169835	0.0689358	0	0	0.0143045	0	0.0230008	0.0276794	0.0251713	0	0.0368105	0.00655712	0.0227457	0	0	0	0.0657463	0.0206285	0.0334087	0.154788	0.943063	0.0237985	0.0137651	0.015532	0.0153775	0.0723276	0.00897785	0.0510932
Gm14139	2:150191976-150193131:+	0.167407	0.00906099	0.0122087	0	20.8193	0	0	0.0414259	0.00450575	0	32.5626	0.0210898	0.0343182	1.01603	0.0123997	0	0	0.0243224	0	0.0083638	0.0240643	0.0157869	0	0.0269634	0.0740497	0.0172655	0	0	0.089651	6.63206	0.0075399	0.0227878	0.668034	2.76146	0.015308	0	0.0506097	0.0359451	0.159005	0.171276	0.0030344
Gm14288	2:175790061-175791199:-	1.9368	2.11116	3.15056	7.65032	7.53555	0.39782	7.47999	4.31956	2.0462	0	12.2984	2.28155	4.73526	4.31609	3.07751	2.23935	6.80487	4.139	8.59606	1.66905	3.06336	2.35837	1.32581	2.8139	2.93786	2.30299	7.30309	9.57872	3.5365	0.743232	1.48036	1.73978	2.23124	3.92834	2.07465	1.9409	1.96532	2.03345	0.311221	1.57452	4.03679
Gm14295	2:176808949-176811428:+	18.379	4.7485	7.86967	17.0962	35.4703	0.706551	10.5119	33.6872	11.5175	0	37.5243	9.02252	23.227	18.4989	16.1348	5.93246	12.6025	15.0231	4.38115	7.98695	11.3504	10.1915	2.04122	10.3572	8.64935	10.568	11.7927	19.703	14.6553	0.487773	7.0384	8.11126	9.7721	14.1207	19.2057	9.54158	6.73146	12.2724	4.68444	7.93637	23.2155
Gm14296	2:176916670-176917471:-	5.90333	7.13613	8.18386	15.0512	12.5505	0.687289	8.32899	17.2038	8.22632	0.10528	9.88357	9.5858	16.0271	10.9515	9.58605	2.49739	9.50718	8.0533	11.3661	7.65809	7.37621	6.40484	1.3133	8.51343	7.92961	6.92221	3.35437	10.6639	11.7151	11.3478	7.7719	6.93486	9.48981	5.963	6.25491	6.12956	2.3681	6.65483	0.476629	3.351	9.29631
Gm14305	2:176720547-176722019:+	24.5184	15.0831	18.7879	29.55	26.2047	0.877196	8.28746	35.0499	25.2126	1.20365	14.161	28.1115	30.3925	17.5055	11.4587	5.6873	17.4498	22.6456	15.224	25.015	20.1058	19.0926	2.4315	21.4768	10.2142	20.4361	10.3938	19.9642	10.475	1.32842	25.6151	25.7199	25.1479	12.3598	26.6614	15.0378	7.18112	18.4111	0.982248	15.9235	28.2396
Gm14306	2:176680127-176681692:+	5.79238	5.63316	6.25861	8.41854	13.2108	0.61248	11.4444	5.67856	7.03771	0.31584	26.9826	8.14669	6.48005	19.3127	13.0014	4.34004	17.9727	9.56014	9.38244	6.24365	6.679	5.9013	1.81459	7.15981	6.69558	6.12336	10.9772	18.784	14.9845	14.1633	6.90648	6.85192	11.1686	6.51248	6.04175	9.25363	2.31009	6.22223	1.4479	7.87593	9.32296
Gm14308	2:176622635-176624107:-	8.61327	15.0353	8.11269	12.855	1.27102	1.3042	7.39218	12.6709	18.2192	0.481883	2.62944	17.3135	11.6302	12.3686	7.86842	5.25147	6.85773	13.6164	3.87714	14.506	15.4257	13.3938	4.06535	15.3546	6.62556	12.0683	5.95706	19.1983	10.016	10.078	17.1605	14.8914	5.40855	7.67315	18.518	4.54853	8.23355	11.409	0.259165	9.95886	11.7012
Gm14322	2:177769626-177770849:+	3.6438	4.22196	5.99833	13.1999	22.5156	0.1994	5.71376	10.7155	7.89932	0	28.7817	6.20736	8.89276	0.0273849	0.0421898	1.86105	3.07927	5.22909	2.14414	4.43524	3.82162	5.80749	0.398723	6.5496	2.56403	7.93709	1.13916	3.81479	2.26937	0.308184	4.52597	3.27634	1.91354	5.19847	3.7147	2.22614	0.548466	5.22225	0.276214	1.45743	9.8129
Gm14325	2:177831585-177833056:-	40.6996	25.5294	34.3423	48.2061	55.2833	1.65095	30.0948	34.5322	30.0953	0	44.6393	34.8836	41.2659	35.9657	22.9188	33.4883	16.3676	32.5163	52.3834	32.5647	23.5506	24.8611	7.52944	27.2785	20.1741	24.8964	18.3616	27.1479	11.4779	28.2156	32.2925	25.3412	23.9278	42.6234	33.1652	18.8752	8.43896	22.8918	5.77861	15.2718	53.2454
Gm14326	2:177945153-177946970:-	17.6401	4.91284	6.85439	15.0371	21.4575	1.45272	15.7184	15.589	13.9528	0	22.8631	12.2538	14.3609	26.1716	18.3155	6.37836	27.2594	22.9473	10.8369	10.9725	14.4662	12.3917	2.32117	12.5066	8.51067	13.1862	37.6662	24.5931	13.8389	16.7227	10.8446	11.3162	14.8806	8.00378	28.7212	12.0876	5.81903	13.3478	0.578717	9.13763	26.667
Gm14391	2:175194708-175196347:-	2.09976	9.7	11.039	13.0469	16.7956	2.44392	13.1773	11.0363	5.64955	0.451502	26.7042	6.34752	11.2131	20.3479	14.3046	10.946	11.1187	5.52149	15.5362	6.01771	4.84414	4.69451	4.62137	7.02107	5.30933	4.44443	7.3591	12.2129	15.0217	6.81781	5.82651	4.58413	9.22874	8.63062	4.34613	3.72313	3.0842	3.74822	2.81432	4.99825	8.29477
Gm14393	2:175061238-175061881:-	1.87105	0.135795	0.230004	0.618632	3.7088	0	0	0.756456	0.723314	0	14.3769	0.570158	0.361508	5.83885	2.41484	0.0763757	0	0.973047	0	0.414072	0.695408	0.518205	0	0.394274	0.301542	0.83803	0.38546	0.207883	0	1.42901	0.511106	0.347507	0.415485	0.633117	1.01365	0.536972	0.365786	0.833693	0	0.375641	0.800045
Gm14399	2:175129922-175131729:-	6.07374	5.24588	6.63053	15.1793	12.4556	0.238119	12.741	15.9623	4.76253	0	31.0088	4.98359	19.0949	12.5586	8.67773	1.90954	17.6719	9.63542	10.509	4.42935	3.85186	4.12931	0.477277	4.27386	4.39547	4.44123	9.32142	13.0112	5.38971	1.28241	4.28616	3.05066	9.64547	7.84679	3.65832	5.74799	3.03082	4.18717	10.3437	2.47085	10.2915
Gm14401	2:177086353-177087164:+	0.105965	0	0.0178889	0.0263464	4.86092	0	0.039981	0.0256375	0.0906264	0	47.6283	0.0800965	0.013895	6.24127	4.79581	0.527279	3.97806	0.134332	0.312686	0.0471927	0.236193	0.170672	0	0.0657806	0.0628235	0.174897	0.0292091	0.130935	0.241774	1.77813	0.125924	0.0449843	0.109981	1.18496	0.0594335	0.130768	0.0353393	0.160048	0	0.0657695	0.170891
Gm14403	2:177508496-177509809:+	4.08881	1.54468	2.42816	8.78561	18.3021	0.459135	1.86617	6.194	4.97991	0	23.4715	2.9305	5.69663	0.0956602	0.186186	4.12649	6.49228	7.62344	6.94767	2.78269	3.87065	5.12321	0.631611	4.1144	8.97162	7.55922	0.726236	6.88519	3.86306	5.95789	2.48139	1.90477	8.90801	7.46469	4.59545	3.52171	0.827132	3.99411	0.224447	1.01157	10.1503
Gm14406	2:177569105-177570253:-	0	0.0226525	0.05458	0.0904522	10.8907	0	0	0.185996	0.0387847	0	20.6634	0.00767024	0.201716	0.11319	0.348004	0.0556653	0	0.00566092	1.47409	0.019534	0.0262351	0.014546	0	0.0138064	0.00441375	0.0362599	0	0.0269292	0.0634969	0.958579	0.0215703	0.0106717	0.134422	0.432503	0.067924	0	0.060207	0	0.0430495	0	0
Gm14409	2:177264589-177265568:-	0	0.0225021	0.0211608	0.0804965	11.0831	0	0.205785	0.0396441	0.0175126	0	25.7594	0.0111379	0.0195846	1.63059	2.00792	0	0	0.0113071	0.268017	0.00446825	0.0231508	0.0029526	0	0.0121613	0.00752148	0.00489318	0.194745	0.117445	0.0572205	8.22469	0.0115363	0.0138332	0.224036	0.693562	0	0.0344127	0	0.023496	0	0.0117292	0.0275516
Gm14410	2:177192767-177194238:-	26.5877	20.9227	21.0258	40.6713	23.5808	2.07093	6.41619	40.9052	21.2341	0.436311	23.4541	24.4724	36.6228	20.1502	21.7227	8.25409	25.2522	17.1431	18.2041	23.0365	16.7538	17.9987	3.82917	20.6671	9.22819	18.4283	9.8541	15.7863	8.90643	16.42	25.1795	24.6192	18.274	12.9441	18.4328	11.0386	6.92529	14.8374	1.40119	11.5265	21.2554
Gm14412	2:177314218-177315788:-	0.126962	0.185269	0.335136	1.61636	2.53581	0	1.77915	3.27313	0.365275	0	44.3565	0.221158	2.16231	13.541	8.89656	0.166273	0.186597	0.352203	0	0.233802	0.208095	0.240404	0	0.280837	0.12789	0.234295	0.0201741	1.05291	0.510667	2.40842	0.243634	0.202039	2.7278	1.02267	0.113012	0.208815	0.0174234	0.230517	0.144366	0.0610086	0.636858
Gm14418	2:177386746-177387969:-	5.24757	3.0191	4.39371	9.27459	22.3038	0.435087	0	7.93446	8.04089	0.240942	33.4469	6.87426	5.83002	0.0135054	0.0692609	2.22166	3.11381	6.62555	10.2788	5.62408	5.05854	7.1828	0.324783	6.37795	3.22213	9.61924	0.853298	3.36141	1.87406	0.185951	5.77185	3.8563	2.68022	5.87893	2.97188	2.38316	1.04804	6.31374	0.251122	2.02121	10.6174
Gm14419	2:177011269-177012992:+	12.4765	2.09258	2.68512	7.81169	32.2741	0.145813	5.47231	10.5554	8.51691	0	19.7929	6.23412	8.59261	14.6977	10.5014	3.00453	3.65168	10.1451	3.78497	5.5221	6.93001	7.9565	0.668581	7.77158	4.57464	8.55652	1.85586	11.2211	7.77827	0.353217	5.63615	5.92819	7.71097	8.23674	7.29694	2.30562	3.41742	6.84367	4.1923	5.57384	11.7918
Gm14420	2:177474865-177476604:+	5.93919	6.24407	9.45178	18.3636	13.9534	1.69131	10.6742	13.886	10.2518	0	27.5203	6.42851	11.1741	7.55495	5.76381	15.6376	15.9174	14.9574	13.4665	5.32987	10.121	9.9827	4.6698	9.89722	15.328	12.4845	6.34041	10.2561	11.7497	12.672	5.53703	4.34451	16.9075	11.1109	10.2164	12.945	3.55793	9.94114	1.63815	3.23382	27.7962
Gm14434	2:176473071-176474543:-	20.2793	9.09201	11.3888	9.64114	32.0701	0.310379	17.1284	11.9602	3.45632	0	3.32312	10.6412	11.5231	2.808	2.61011	9.32627	2.07217	4.23602	5.45047	11.5075	4.35331	6.75409	0.947904	3.83616	3.4361	4.41603	5.12354	2.76708	3.46568	1.25801	8.11089	12.731	3.8682	5.78493	6.62933	0.753367	4.78671	4.72715	2.89407	11.8575	11.5427
Gm14440	2:175284962-175286100:+	0	0.156637	0.0687754	0	0.744239	0	5.89719	0.112274	2.35047	0	0.982572	1.38327	0	3.60521	2.72306	0	10.6872	0.843827	2.32281	1.19224	0.393156	1.60585	0	1.61204	1.63984	2.50684	0	4.1272	1.51303	0.0642804	1.72918	0.613276	9.43395	0	0.263206	6.20116	0	1.36822	2.01615	0	3.05926
Gm14443	2:175168848-175170420:-	0.246195	1.12722	1.3976	2.70404	3.42743	0.0823414	0.302602	2.75651	0.906002	0	14.7374	0.867762	2.53261	10.5233	5.93214	0.204534	0.096715	0.438342	1.02952	0.608353	0.382563	0.616285	0.0545348	0.869427	0.225782	0.45941	0.053569	0.443558	0.765971	0.60573	0.785814	0.743704	0.575979	1.69568	0.419883	0.420335	0.245773	0.532867	0.434544	0.14367	0.691687
Gm14444	2:175018198-175019346:+	0.109061	0.0721872	0.040264	0.227162	16.7977	0	0.0184227	0.581423	0.0253992	0	34.5921	0.0383147	0.577358	0.0277591	0.127987	0	0	0.0248078	0.0187301	0.0572447	0.01745	0.0338491	0	0.0396876	0.0104961	0.0398477	0.0160608	0.0232546	0	1.39009	0.0548568	0.0576309	0.142568	0.464207	0	0	0	0.024787	0	0.0397542	0.0552242
Gm15446	5:109942195-109943603:+	0.882893	0.0586559	0.0674297	0.120527	11.8324	1.0124	150.958	0.0524629	0.581007	0.225751	10.2793	1.56263	0.0882209	27.2393	11.7723	1.8648	57.7141	0.603874	91.8006	0.613898	0.554795	2.82157	1.80411	0.596716	0.738613	0.776258	18.6182	41.9855	21.3652	36.5609	0.760171	0.433231	21.3607	0.0619893	0.460537	11.1408	1.61804	0.631288	11.4557	2.29916	0.490439
Gm17067	7:42705971-42708680:-	0	0	0	0	0	0	0	0	0	0	41.9121	0.000243736	0.00652818	0.0067527	0.00769866	0	0	0.00357054	0	0.000466186	0.00455637	0.00622468	0	0.00288641	0.0117107	0.00293591	0	0	0	0	0.00420154	0.00480641	0	6.42469	0	0.0550603	0.0150087	0.00469361	1.77708	0	0
Gm2004	2:176141385-176143108:-	0.496233	0.350038	1.00387	1.08386	5.1955	0.0069435	5.24027	4.6856	1.07462	0	18.4604	0.739845	4.00769	8.16898	11.4086	0.112187	3.29479	1.57379	0.357356	0.543909	0.945973	1.50294	0.075543	1.39948	1.05391	2.77233	0.181175	6.58663	4.53247	0.32567	0.624277	0.466217	4.33127	3.74152	0.441883	1.4506	0.236654	0.912263	0.325281	0.236214	2.07408
Gm2007	2:175750153-175751625:+	0	0.596833	0.270772	0	0.0313885	0	0.0184227	0.0140066	0	0	0.0563241	0	0	0.0273849	2.97602	0	0.144654	0.00466893	10.6537	0	0.0957929	0.0367937	2.32596	0.037531	0.652907	0	0.0134351	5.29177	0	0	0	0.000658337	0.30143	0	0	1.43458	0.060035	2.16073	0.0502244	0.00748252	0.00910321
Gm2026	2:175977558-175979030:+	10.7091	5.62624	5.33761	9.94224	16.0509	0	6.03203	11.1773	21.7415	0.31584	6.80218	20.6654	9.73099	9.77286	7.8617	0.0865905	18.8736	16.9657	7.08012	16.146	15.4017	14.8987	0.346419	18.9988	7.5297	15.7205	9.74138	10.7117	7.56512	8.0083	17.3633	17.3324	10.1571	5.90909	16.5579	5.16238	4.3816	14.4652	0	5.16145	13.0547
Gm20939	17:94875730-94877971:+	1.5533	0.0926723	0.347021	0.16493	5.16805	0.013887	2.3632	0.472522	1.63873	0	17.0498	1.18604	0.455115	4.66774	2.7115	0.452069	2.20621	1.18715	2.89553	1.28206	2.67627	1.5257	0.0296931	1.70381	1.9394	1.45376	1.74158	3.32303	1.6892	2.44642	1.06268	1.4199	1.41754	1.00437	0.747792	3.27422	0.741663	1.72699	0.0288925	1.17326	1.72704
Gm21814	6:149583221-149584667:+	0.677841	1.06456	1.12765	0.412628	2.03561	0.208305	8.55593	0.320361	4.08571	0	1.79042	2.35908	0	0	0.166613	0.201937	4.62699	1.50767	2.45682	2.16944	83.9205	3.2246	0.495036	3.08113	1.26806	1.50203	0.750956	3.98557	0	0.122757	2.12743	2.24035	0.183302	0.363283	0	5.48198	0.263782	8.40039	0.203597	1.88094	2.50173
Gm2381	7:42817790-42820398:-	0	0	0.00151533	0	0.601137	0	0	0	0.000380768	0	36.2682	0	0	0.0142537	0.00971415	0	0	0.000725745	0	0.000471586	0.0033647	0.00106269	0	0.000359119	0	0	0	0	0.00225362	0	0.00115765	0	0	1.28036	0	0	0	0	0.14398	0	0.00344846
Gm26920	7:30056167-30057238:-	0.361681	0.538167	0.588022	0.314718	0.190332	0	0.039981	0.328908	1.9079	0	0.428763	1.66276	0.211895	0.14005	0	0.281191	0.871514	0.44266	0	0.9724	0.56549	0.918097	0.197954	2.07265	0.232589	0.630876	0.505917	0	0.183377	0.284419	1.43954	1.16774	0.0542785	0.0404814	0.15308	0.0323191	0.366891	0.736812	0	0.650673	0.0711221
Gm28557	13:67069579-67071511:-	2.10516	1.32761	2.26684	1.56967	4.68556	2.03994	3.73628	1.78406	2.5024	0.361412	2.99236	2.19248	1.5052	5.62989	3.69533	2.94343	5.83475	1.88735	7.70875	1.6521	2.58535	3.73583	4.20853	3.03508	6.48376	2.88782	3.87749	4.82718	4.78556	3.7705	1.64008	1.69356	3.90257	4.34364	1.99175	6.03395	2.04728	2.4348	0.974976	1.68292	3.55902
Gm3604	13:62368901-62370140:-	3.2926	0.494503	0.774103	0.411485	6.43716	0.0345214	9.7985	0.886945	3.15229	0.225751	7.85311	1.80008	0.7956	3.11642	2.33823	0.152176	11.7211	3.26606	6.98534	1.60291	3.83701	4.17016	0.190872	3.26421	3.92157	3.3741	7.8136	10.8541	4.81052	0.221971	2.03649	2.31911	4.42439	4.0949	1.77518	2.40676	2.38708	2.56012	0.2896	2.82727	3.3415
Gm4245	2:175692639-175694120:-	65.24	0	0	0	0	0	10.9348	0	10.6987	0	0	7.13046	0	0.482936	0.510743	8.51317	8.64542	17.1218	7.24856	6.96149	24.9115	14.3915	1.16793	11.1471	12.6804	18.3972	5.35786	11.5008	1.07859	0	6.45407	6.71764	0	0	13.461	0.00646381	11.794	19.0351	0.939914	13.6904	28.705
Gm4631	2:175324536-175326008:-	4.67939	8.49457	13.0262	21.2361	18.9723	0.680738	21.2766	21.1496	16.8503	0.10528	49.9241	13.2464	18.7249	27.6333	16.8301	2.46826	23.6381	10.2252	18.6543	11.7776	11.6441	12.6458	2.23213	14.9996	10.2532	11.928	12.5714	21.5092	22.284	9.73899	13.2801	11.2954	15.5932	7.65968	7.51878	15.5872	5.14989	11.5725	0.874142	6.25954	11.807
Gm4723	2:175382039-175383520:+	8.26049	2.19739	2.40868	3.21717	5.84307	0.475963	9.64445	2.23431	4.17116	0.5264	9.78502	4.08045	2.84917	8.53394	4.40836	2.19938	8.03488	5.85741	9.3746	3.33085	4.4229	4.03209	1.01413	3.76742	3.11515	4.05689	4.11113	5.81379	5.4956	5.81086	3.48733	3.85459	4.58105	2.76692	3.37909	3.56956	1.77282	5.13754	0.485829	3.66404	6.60472
Gm4724	2:175422093-175423565:-	20.9814	6.55002	14.0583	21.8683	10.5508	2.58601	7.51135	23.7978	9.8634	0	12.5712	11.241	21.1558	10.2277	4.17767	6.92526	7.05877	9.32254	6.86808	13.2863	8.24239	10.1363	4.54865	10.8912	5.89147	9.16356	7.63924	9.07301	8.99817	5.56227	11.3644	14.4536	11.4994	8.44853	10.7561	5.64565	4.17511	8.97989	3.18728	9.83788	22.3719
Gm4767	10:81822175-81823330:+	1.40866	0.28488	0.630916	0.547466	2.71022	0	0.128959	0.430394	2.3114	0	2.05632	2.27514	0.407444	2.51035	0.840732	0.0247401	2.7548	1.78067	0.899046	1.87864	2.2955	2.10886	0	2.42749	1.30332	2.10577	1.55376	2.82426	1.79139	1.50604	2.13816	2.6007	1.18715	2.03634	1.63812	0.794566	0.712116	1.77602	0.0789241	1.37133	1.44053
Gm4944	17:22199841-22201414:-	2.14914	1.65532	1.73141	1.53774	4.76643	0.225997	7.32045	1.55484	2.47486	0	2.18801	3.32627	1.70872	14.3448	8.77439	0.441426	7.86288	2.30669	8.764	2.71599	3.65722	2.44746	0.659074	2.04783	2.38562	2.49324	8.7563	8.30211	4.72878	2.72985	3.11416	2.74248	4.328	2.25235	2.14136	7.62626	1.60608	2.59939	0.23899	2.51521	2.51921
Gm5141	13:62773292-62774948:-	2.29145	2.64338	3.06131	1.58171	4.59338	0.0134947	4.79185	2.07022	7.56355	0.21056	3.99406	7.14026	1.54985	0.0202581	0.0161902	0.168428	7.33663	4.08027	4.9962	5.55492	4.16642	5.48721	0.13755	7.32887	1.69683	5.35241	7.77429	7.50454	1.43298	1.2512	6.33739	6.33322	3.72114	1.43632	2.67091	2.1261	1.09635	4.40735	0.411188	2.72753	2.62001
Gm5595	7:42660966-42662791:-	2.16463	2.08726	2.61436	2.42657	1.39635	0.362318	5.7267	2.43122	6.17785	0.10528	17.2126	3.91234	2.89089	5.54415	4.50577	0.512768	6.01014	5.84157	5.61069	4.23023	4.66713	4.59716	0.433657	6.38677	3.40112	5.19275	2.16587	5.08334	2.84769	0	4.81863	4.72923	8.12109	4.34854	3.76096	4.72958	1.35168	3.97065	0.455683	0.976204	3.73412
Gm6710	2:175879814-175881453:+	19.0795	6.36444	6.00424	4.59475	17.7641	0.053979	6.15042	6.04129	17.0487	0	7.49639	22.228	5.49732	11.6077	7.01581	3.46786	12.8002	14.8565	5.32691	18.2705	13.359	14.9132	0.235314	14.2012	7.04874	14.0849	4.02112	13.4705	7.98828	2.83706	19.8298	20.2039	9.12384	4.56118	13.6777	8.22635	5.0748	13.6413	0.640303	7.60728	15.767
Gm6871	7:41544863-41547155:-	0.0055932	0.0225021	0.00606131	0.00539419	0.195018	0	0	0	0.0227524	0	64.8219	0.00717265	0.0343182	5.48453	4.52863	0.704209	0	0.0579145	0	0.0249051	0.0378053	0.0717033	0	0.062732	0.0418156	0.0175069	0	0	0	0	0.00387083	0.0161012	0.122201	4.34249	0	0	0	0.0111943	1.17169	0.0209483	0.00606881
Gm7221	7:42579380-42580703:-	0.392798	0.551428	0.63515	0.362833	0.0411028	0.0746134	2.16407	0.484045	1.23201	0	37.0687	1.04016	0.661986	0.140817	0.0296824	0.18871	0.154811	1.14319	0.611661	1.01962	1.20247	1.16735	0.0296931	1.47799	0.551933	1.38622	0.0468729	0.49002	1.34809	0	1.15095	1.3506	1.65498	3.23753	0.212388	0.641413	0.228241	1.11584	0.846599	0.151662	1.0793
Gm8898	2:175920041-175921522:-	0.668545	2.7514	3.95768	4.33564	6.42996	0.232156	16.5761	2.52108	3.0849	0	25.5758	2.8057	3.13991	10.9456	7.76066	0.784896	13.7736	2.33358	17.8616	2.08627	1.84366	2.29138	0.469805	3.54372	2.91789	2.09535	4.7098	10.7612	10.5356	11.3209	2.37365	1.73057	8.89853	4.26925	1.31548	9.1637	0.678723	2.38194	0.194976	1.02245	2.70028
Gm8923	2:175479590-175481155:+	5.21144	2.49366	2.9387	2.95149	7.74306	0.164683	14.3352	2.31605	4.99504	0.31584	5.22017	6.0346	2.54367	11.5036	10.2525	1.26445	10.8356	7.35547	10.091	5.3785	5.31415	4.24926	0.485767	4.59543	3.74017	4.41586	9.99927	8.53742	6.53733	3.88427	5.23984	4.90436	9.0025	2.66239	5.49093	4.95586	3.32329	4.80247	0.231525	2.72323	6.85153
Prdm9	17:15543987-15545337:-	1.48222	2.10013	2.59629	3.11137	5.04201	2.53889	6.181	1.80731	1.04771	0.225751	2.01257	1.3211	1.90082	5.68037	2.405	2.15622	2.75604	1.58386	4.32121	1.21762	1.43127	1.84054	3.61084	1.06135	2.51915	1.3423	4.5936	2.61905	4.05158	3.12549	1.46392	1.55009	1.22296	3.55183	2.04926	11.7842	2.64448	2.53596	3.82931	1.65689	3.08474
Rbak	5:143173202-143174519:-	3.88124	9.45781	10.5888	8.07584	4.36822	3.20543	4.96393	6.79967	8.80389	0.331031	7.67525	9.24635	6.91438	11.2426	8.08564	4.2093	7.74633	6.12845	8.85913	7.20982	4.74267	6.299	3.93848	10.1919	3.40853	7.14718	5.0423	5.85314	5.28181	8.01599	7.93567	8.26665	5.44023	4.9266	4.8894	2.94325	4.60167	5.56923	1.8209	6.23451	7.53128
Rex2	4:147057812-147059721:+	0.0345243	0.0180017	0.0257955	0.00539419	0.0175049	0	0	0	0.0276501	0	181.145	0.013993	0	0.207582	0.274004	0	0	0.0209724	0	0.0338711	0.00800591	0.041906	0	0.0252413	0.0595995	0.0322564	0	0.0221985	0	1.27358	0.0335966	0.0134174	0.317724	0.0700856	0.0900495	0	0.0883036	0.0160868	0.0652491	0.0176666	0.0216038
Rsl1	13:67181849-67183005:+	2.95433	2.73378	3.45573	2.23631	11.7226	0.523195	7.09625	2.73971	5.22559	0	2.89552	3.79343	2.32719	10.0248	4.65804	1.11774	6.06663	4.6385	7.55509	3.35851	5.08331	4.67434	1.35774	5.14828	2.96935	5.14221	7.06544	7.52242	1.76232	0.164561	3.64734	3.71354	7.2511	4.39771	3.48232	5.11002	2.24941	4.25773	1.02819	4.23361	4.71952
Rslcan18	13:67098295-67099030:-	0.154524	0.0928078	0.117658	0.108507	0.61244	0.0269895	1.13946	0.127124	0.208252	0.240942	0.832643	0.0811141	0.161289	2.0813	0.661133	0.229703	0.997959	0.391948	0.471151	0.0718177	0.198098	0.278552	0.190872	0.197941	0.682703	0.172406	0.615794	0.953006	0.653617	0.477252	0.0424616	0.102877	0.355233	0.562909	0.147936	0.268167	0.235776	0.227661	0.108202	0.0796076	0.300233
Zfp1	8:111669900-111670551:+	9.14365	16.6193	16.3966	14.7654	11.7659	3.41856	8.54654	16.6118	16.8392	2.36384	13.6287	19.1226	16.3587	11.5347	8.69	10.6447	14.1508	13.3885	14.7183	15.4997	12.5022	13.585	5.10636	17.1897	9.32316	12.3657	6.71333	13.6023	9.78134	9.93385	17.0931	16.3011	5.87248	14.9331	13.5566	3.91861	8.56266	12.3311	4.65751	16.4484	10.8195
Zfp101	17:33380965-33382120:-	4.56528	13.5859	22.8479	10.6015	15.2286	1.58081	23.1384	7.73613	17.4522	1.47498	11.857	15.1233	6.95535	43.2194	20.2693	2.94624	19.8381	7.82794	30.528	10.9483	10.0773	12.6003	3.9889	22.2511	16.3725	13.2225	35.2315	25.1069	21.6054	11.3543	12.9233	11.8494	7.45382	11.9593	6.01885	11.6433	9.6705	9.66643	0.970115	14.8176	7.06537
Zfp108	7:24260831-24261896:+	1.27768	3.02727	2.77276	4.04137	0	0.733933	1.50086	4.14946	3.61863	0	1.53701	3.5386	3.57437	0.118042	0.300197	1.77607	2.42186	2.15033	2.14696	3.74337	2.33581	2.5187	0.715211	3.58823	1.22511	2.59439	0.521027	1.34031	0.614409	0	3.6034	3.68191	1.89875	0.870197	1.98435	0.800724	0.539199	2.4344	0.389856	0.581216	2.48367
Zfp109	7:24228065-24229130:-	0.815246	2.51952	3.1493	4.79473	0	1.21947	10.3096	4.41961	4.05383	0.42112	4.74254	3.57817	3.07689	1.36235	0.962055	1.52924	5.69576	3.20892	8.85199	3.22443	3.20555	3.33978	1.44983	4.51023	2.93298	3.19756	1.55641	6.92783	3.43177	0	3.24748	3.04672	1.95312	2.05325	1.47488	0.964425	1.16428	3.37252	1.00464	2.23948	2.8754
Zfp110	7:12849493-12849892:+	12.934	8.95286	9.38101	8.94726	34.5711	9.46867	28.8263	5.78735	27.2347	3.74873	51.9123	24.6029	6.53779	34.9966	30.1454	14.7	31.4812	20.8477	31.9688	19.0275	22.2966	20.0605	11.6947	25.8411	21.1645	28.8889	30.9474	28.914	21.9935	30.6228	19.5231	18.2376	10.7846	15.4603	20.9935	14.9388	18.7411	21.4871	42.9111	25.1997	20.6923
Zfp111	7:24198150-24199554:-	2.7912	3.4063	4.0297	3.69475	0	1.73796	15.758	2.91978	8.19185	0.10528	7.13977	5.75563	2.85277	0.638418	2.05278	3.09819	17.3545	5.9348	10.8058	4.26823	6.32351	6.48318	2.36945	8.41334	3.12552	7.32641	7.25911	14.1489	3.47131	0	4.87864	4.64971	3.68476	3.65638	3.27604	1.78904	1.68526	6.245	0.779615	1.64103	4.93299
Zfp112	7:24126168-24127155:+	6.04722	4.44758	4.26508	5.24328	0.494295	3.37447	0.396283	7.47181	5.7362	1.06799	0.773175	5.80548	5.51912	0.240741	0.544646	2.94616	0.634549	4.70686	0.656331	5.33979	4.66396	4.58095	2.24621	4.99669	1.93561	4.44765	0.292132	0.529304	0.383472	0.89753	6.18826	6.2493	4.51891	1.37069	5.95276	2.20719	2.16955	4.79771	1.08569	1.56656	4.1497
Zfp113	5:138144729-138145380:-	9.85912	8.0203	9.27851	2.71284	6.81576	3.23018	7.80885	3.25491	15.0397	0.587163	4.14453	23.1441	3.2906	9.66444	5.01679	2.50084	7.45128	9.97786	11.2243	18.682	10.4894	13.5698	4.3462	14.1532	7.19256	12.828	3.42009	6.93536	5.48974	9.62165	20.6639	18.3321	7.49388	3.4134	11.1435	3.41922	6.5945	10.3226	2.58015	8.89209	6.64684
Zfp114	7:24181151-24181970:+	0.667229	1.4111	1.57152	1.33049	0	0.123414	1.4405	1.07028	3.53258	0	1.69044	4.21476	1.10931	0	0.00447582	0.207841	1.34996	2.3088	2.36014	2.80725	2.30728	2.67412	0.0607939	3.33054	0.791602	2.92678	0.269577	2.13893	1.39415	0.0214268	2.84129	2.65225	0.69207	0.391031	0.513153	0.132961	0.516943	2.79232	0.0722312	0.515829	0.898585
Zfp119a	17:55865236-55866373:-	4.59375	2.91259	3.46956	2.70288	6.54757	0.425594	7.23736	2.37401	7.39194	0.225751	4.11911	7.88532	2.19204	5.03492	4.80688	0.745202	8.24384	5.78138	10.2512	6.81826	5.96381	6.60588	0.650584	7.04246	4.36208	7.13019	9.81917	6.45745	2.93915	2.25037	8.15909	6.9587	4.49039	2.63668	6.37457	4.27732	3.06531	6.66369	0.25305	3.45918	5.64476
Zfp119b	17:55938585-55939716:-	4.41813	2.1477	2.40578	2.38239	11.4459	0.102583	2.74733	1.98869	4.47167	0	3.61525	5.0074	1.49688	3.40733	2.15209	1.03373	3.9658	4.39101	6.05668	4.74081	3.83212	4.63145	0.75582	4.72438	4.16363	5.36667	9.6474	4.51552	2.92787	1.67138	5.51855	5.45455	3.69607	2.1623	6.53614	4.49088	3.01481	4.16654	0.455972	2.87796	5.99997
Zfp12	5:143244615-143245854:+	9.82308	24.2097	23.177	19.0028	16.8137	8.1984	17.5274	15.6082	15.3932	0.451502	8.18225	19.3369	14.5665	13.8612	9.91135	8.80313	8.36158	8.64978	20.319	15.1904	7.58625	11.0818	6.26857	16.7959	6.69369	11.2326	3.98971	6.73321	11.2139	21.2068	16.2744	15.7547	15.2077	9.42814	7.01232	4.41877	10.6839	8.51869	7.64596	17.7322	8.62949
Zfp120	2:150116032-150118247:-	4.85123	2.32951	2.86876	3.30712	13.6461	1.64232	19.7126	3.03237	5.05669	0.120471	8.48903	7.4416	3.18355	14.745	9.37265	2.21289	14.1546	4.9868	16.5856	5.72685	6.01344	5.67325	1.27128	4.87453	5.75246	6.84194	28.7214	12.8384	8.35231	10.0677	6.72949	6.59992	9.33443	2.85521	7.74041	13.336	4.40914	5.59352	0.2961	5.22577	5.61448
Zfp128	7:12890471-12891164:+	1.10547	7.15267	5.77114	4.00184	1.42311	0.657162	1.74035	3.71433	4.05858	0.240942	1.44933	5.89826	3.35254	4.21266	2.98879	1.32874	2.93332	3.06528	4.33337	4.41243	2.4787	2.71662	0.605947	4.5795	1.5988	2.93085	4.49238	3.5686	3.018	1.50874	5.32769	4.72403	3.38513	1.72461	2.00777	0.595001	1.41918	2.1324	4.38381	1.97806	2.05506
Zfp13	17:23576143-23576794:-	19.7461	33.361	26.6017	17.5518	0.0986279	14.3845	0.255173	19.0425	12.391	0.466692	18.6914	18.4923	20.1129	0.114232	0.0875214	28.4082	1.05792	7.5965	0.089339	16.5764	7.21783	11.185	7.00518	15.1755	3.95382	10.5925	0.0334806	0.304966	0.171192	0.136263	18.2054	15.5878	27.4038	4.47327	6.12082	8.23448	3.98586	10.2416	63.838	2.03556	7.05304
Zfp14	7:30038064-30039135:-	2.93754	9.49404	8.44575	11.2356	0.585228	1.82901	1.43109	9.60049	4.46843	0	2.39786	8.01544	7.00632	0.0171491	0.00447582	5.80587	0.965821	4.46723	3.06834	6.57529	2.42223	2.88478	2.67604	4.34094	1.18961	3.54609	1.72802	1.40255	1.14206	0.827844	7.82568	6.97587	3.49268	2.46341	2.96833	1.44086	1.7318	2.73197	1.69108	2.93266	6.64309
Zfp141	7:42474910-42475903:-	2.8193	8.64548	8.49553	2.2909	17.3168	0.921486	40.3315	5.42003	8.41744	0.767342	27.5615	9.24994	6.00906	17.9027	10.7476	1.77117	37.1411	5.04584	46.5054	7.25886	5.60095	5.89602	1.86752	8.66798	6.26267	5.00419	13.3037	48.8878	21.1171	9.87646	8.29958	7.79928	7.71334	4.36842	3.34802	4.86247	4.26324	4.72632	2.76862	4.864	4.56169
Zfp157	5:138456012-138456996:+	8.53263	25.6549	25.4614	12.8905	12.0267	1.99847	12.6638	11.6052	33.0999	0.225751	12.3236	44.708	13.8905	16.0752	6.82867	5.16187	16.0102	18.9499	15.468	37.3469	20.6318	22.9739	3.34457	31.9543	8.88167	20.7706	12.5825	13.0847	9.19502	8.4994	43.6912	41.0642	10.9268	9.19984	14.3772	6.48655	10.4438	17.6331	3.46118	13.8294	9.13972
Zfp160	17:21025630-21027121:+	2.64785	11.702	13.291	7.72562	10.6245	0.577174	14.2983	7.91619	8.28171	0.225751	8.14443	9.63444	8.24315	12.2833	6.4266	1.97052	13.2553	5.6134	12.7734	7.41656	5.77306	5.88159	1.467	8.84847	5.80564	5.53147	11.947	13.3368	12.5009	6.20173	8.6783	8.04	7.84519	5.80446	4.24099	13.7599	3.55762	5.25268	0.730644	4.98346	7.70956
Zfp169	13:48489462-48490875:-	2.18893	10.0771	8.20412	10.6174	6.42548	9.66224	10.5495	9.82171	3.98995	0.225751	6.64551	6.62849	8.59999	12.9128	8.50122	7.49013	13.3249	3.41249	12.3549	5.41976	3.02744	3.26574	10.1177	4.87678	4.0227	4.11417	10.4402	9.93659	8.06781	10.9161	5.87929	3.88822	5.37675	2.06264	1.05358	9.40718	9.58403	3.15944	14.9335	20.7662	4.77607
Zfp182	X:21030084-21031239:-	2.93712	5.51305	6.81393	6.46941	5.49765	0.451995	13.6194	6.7008	4.78339	0.120471	4.41977	6.45408	6.74874	14.4141	7.88857	1.41821	16.6499	3.65218	17.0692	5.38878	4.01333	3.44932	1.17997	4.5324	4.00842	3.828	15.1739	10.9419	10.8787	8.12809	5.63511	5.24528	5.7758	5.26096	3.20414	12.1814	3.12216	3.7356	0.389952	4.09686	5.80569
Zfp184	13:21958731-21960303:+	2.07153	10.6523	11.0134	0.681695	3.06798	0.137889	11.0861	1.5628	13.1393	0	4.94555	17.9812	1.64511	5.71145	1.77076	1.01289	13.1348	5.11217	16.7581	11.2023	5.15831	7.86192	0.270248	13.6667	1.58036	6.90543	0.332164	13.0504	2.67514	0.811271	12.4475	10.9286	5.32352	2.03396	1.32063	0.500782	1.19639	4.88647	3.49618	2.58361	1.44845
Zfp189	4:49529291-49530707:+	2.87711	4.67207	5.60816	3.28419	5.32531	0.417081	8.07657	2.59794	7.98633	0.857431	2.93271	8.94606	2.34953	8.24521	3.96006	3.64416	3.33833	6.42806	6.78136	8.09035	4.21662	6.57896	0.366799	8.4079	5.94796	5.69975	2.63556	7.59829	7.43993	6.36498	8.96338	8.18697	5.06387	6.20377	4.85209	1.49069	1.78592	3.61526	6.58478	3.6567	2.66959
Zfp2	11:50899840-50900911:-	5.163	16.5681	15.409	13.012	0	0.644844	4.7017	11.9663	11.9635	0	5.30874	30.5073	12.0143	0.00289544	0.0125408	2.27329	2.40175	6.95211	6.09499	25.1345	6.92189	9.13035	1.21475	10.1103	4.29656	7.02733	0.335617	2.01275	4.15728	0	30.6382	24.7049	6.52331	1.71611	4.6717	2.25471	1.81036	6.67502	0.440369	2.25998	3.67886
Zfp202	9:40211119-40211848:+	2.31626	5.76188	5.75944	1.94352	4.53321	0.708257	3.9397	2.04613	5.41246	0.120471	1.86247	6.37145	2.65168	1.63803	0.876523	1.51299	3.98121	3.60822	3.9775	6.08151	2.894	4.29454	0.763292	5.13905	1.8508	2.69951	1.94477	3.51324	3.80779	2.35352	6.79171	6.15061	2.84602	5.50419	4.19218	0.758008	1.30728	2.75669	4.60281	1.0574	3.00415
Zfp212	6:47931030-47931510:+	10.2168	15.1913	15.2978	12.3919	6.4843	11.5224	7.99543	7.78681	13.4124	23.8233	8.33236	13.9236	7.94878	14.017	24.7025	9.3308	9.48755	8.73465	10.0515	11.5873	10.7859	12.2679	11.3507	14.0488	10.7186	14.5403	8.54699	6.82471	20.0578	11.6957	12.7934	10.4948	13.0373	9.62087	10.3847	6.90187	14.185	9.8789	14.9462	23.1806	11.4157
Zfp213	17:23557686-23558085:-	22.6106	13.841	11.2974	6.41339	11.9396	19.1677	7.88176	5.80704	15.5443	5.98999	7.36533	15.1192	5.5526	6.67658	12.5676	18.833	6.63334	14.0836	6.72439	12.4672	13.6528	16.3919	16.1566	16.7795	11.6364	15.485	2.84348	5.02118	12.0961	4.03717	13.2787	13.0031	19.885	8.79508	9.54289	10.2008	17.9178	13.6444	4.55822	18.7258	8.22218
Zfp229	17:21745480-21746962:+	2.95194	6.04993	5.78978	2.85033	4.3321	1.56908	5.87329	0.91971	5.13756	2.73834	40.9268	7.56128	2.53115	5.45956	5.72119	2.22495	3.95785	5.15232	7.03432	6.571	3.61916	4.76054	0.611188	6.20198	4.26786	4.46175	3.58722	4.32239	4.84685	4.28317	7.16377	6.60509	9.80414	23.4143	5.70616	3.02343	2.40795	3.97749	1.58006	2.30448	4.46368
Zfp235	7:24141009-24142248:+	2.87411	6.76999	6.08445	8.25879	5.06795	3.29942	3.96048	7.65944	6.83916	0.31584	3.48382	8.4762	7.31132	4.02396	2.69622	3.50767	4.34087	4.3978	5.43498	7.00775	5.60615	5.20559	4.31697	6.78568	3.51219	5.67258	1.98684	4.04886	2.49788	4.89424	7.68398	7.386	3.18683	3.33849	4.02991	3.55104	2.83907	5.05874	0.866774	4.25172	5.00651
Zfp248	6:118428925-118429492:-	2.41065	5.44874	6.15464	6.27668	4.05229	0.439873	5.18499	5.43387	8.4693	0	2.48535	7.97741	5.59383	5.79601	3.66233	0.977783	2.87376	4.38137	3.6735	9.94765	3.70822	5.07948	0.407798	8.30607	1.90823	4.25706	0.669645	2.17599	2.28316	3.1979	10.2255	10.8793	2.6527	2.41453	3.16349	0.46385	1.35244	4.17468	0.838267	1.99051	3.30369
Zfp251	15:76853379-76854282:-	10.8797	18.7992	16.7681	13.4925	13.89	5.8205	8.78133	19.1225	21.9878	2.94995	7.27739	31.2809	18.0181	17.9391	30.4758	4.22713	6.51813	15.6164	6.03731	26.1756	11.495	13.3053	3.35514	21.7774	8.46842	13.5763	3.23142	5.68023	10.1034	40.2846	26.7498	25.0892	12.6486	6.26014	14.8181	2.44213	10.3074	10.4274	8.42158	16.924	12.1074
Zfp26	9:20436488-20438396:-	3.74383	17.2974	15.0393	9.56958	22.8232	1.07601	47.7739	8.35923	17.3182	0.10528	17.3444	19.3057	9.10344	18.619	11.6752	4.65446	26.2269	9.95678	40.9945	14.4348	10.7616	12.207	2.67627	17.8355	8.8706	13.3253	35.1478	32.9024	21.8993	65.3084	15.7357	13.7599	12.544	10.3693	6.77793	5.87774	5.2924	11.059	3.03107	10.3156	8.87031
Zfp263	16:3748959-3749856:+	18.2046	14.6601	13.962	13.0459	25.1285	9.67654	37.868	12.6022	32.592	4.65068	22.525	33.7074	11.9156	36.4845	35.066	9.31583	36.016	24.0845	39.7146	28.19	27.4568	25.0631	9.28089	30.8363	20.7488	26.3411	34.2853	31.9539	32.3018	19.1703	32.6185	28.259	13.6037	14.1807	24.4742	14.9751	24.475	25.0089	14.4187	30.0168	23.3276
Zfp266	9:20499112-20499931:-	8.56347	34.0137	34.3598	11.9921	23.2565	2.10859	34.2136	11.5202	68.9021	0.903003	31.4624	73.714	13.3596	43.9674	26.3673	7.41435	24.6286	30.1642	42.2469	50.1028	27.7732	37.9999	4.2408	65.2136	18.2625	46.1557	19.5109	35.479	28.2417	74.5557	62.7228	52.5527	27.4497	8.97645	20.609	9.85061	8.46286	31.9182	2.27008	22.7963	29.9821
Zfp27	7:29894093-29895920:-	3.01399	9.38812	9.70886	9.62313	10.2233	1.86916	10.6118	8.54653	9.34342	0.436311	4.79841	11.2812	8.07533	6.25163	4.91258	2.99146	7.87133	8.24515	11.9147	9.52986	6.2658	6.74629	2.73285	9.75884	3.97368	6.37824	3.41426	7.44565	5.69598	4.27452	10.0015	10.2661	2.93954	4.66807	7.80168	2.86115	2.39791	5.36319	1.62226	4.67309	5.51721
Zfp273	13:67825000-67826322:+	5.23639	3.76877	4.38397	3.89099	3.42927	0.199989	6.6447	3.54156	5.92211	0.10528	2.77335	8.37376	3.76183	2.85143	1.09216	0.681625	4.85063	4.02434	8.07034	6.8935	4.67966	5.13155	0.815206	5.72236	2.43003	4.90644	7.91005	6.51929	3.25813	0.614465	7.88438	7.41931	6.44931	2.51987	4.02847	7.31177	2.00407	3.77632	0.607706	4.03109	3.06743
Zfp28	7:6393701-6394859:+	2.58024	8.27437	7.65555	4.31242	0.847116	0.60436	1.51928	3.74933	5.06361	0.10528	2.84863	7.58255	4.8848	1.2017	0.907645	2.02619	1.29984	4.63431	2.89977	6.26996	3.54923	3.29139	0.868528	4.9784	1.58947	3.91042	1.40804	1.41191	1.06407	1.83303	7.19376	6.38968	2.03721	4.78643	4.6574	1.28495	1.65388	2.80856	2.69408	1.27649	4.25789
Zfp282	6:47904925-47905324:+	8.93715	20.1153	16.0667	10.4647	16.1877	11.3993	13.2267	6.9661	14.9244	9.76594	4.79832	17.2098	7.74863	21.0809	27.5501	6.27506	10.3153	7.78685	11.7293	15.618	8.46755	10.7438	9.50252	16.109	6.14592	11.3666	6.85962	8.10134	17.4337	14.1848	16.7041	14.2512	11.7661	6.2691	8.97781	6.59341	9.50415	9.45997	1.63864	11.6719	10.9331
Zfp286	11:62779703-62780519:-	5.79348	14.676	16.1926	7.02445	0	0.62519	3.85935	14.5711	22.577	0.10528	6.72942	22.2679	12.2743	0.289974	0.0238504	0.816558	3.98462	8.73125	6.42846	17.8105	9.79193	10.433	0.513229	22.3844	2.2895	9.1929	0.355067	6.19753	1.74067	0.0302258	20.7367	18.7527	1.89083	1.59698	7.07186	0.342559	1.99717	9.15983	6.17192	10.7934	4.97845
Zfp287	11:62713823-62714978:-	2.99531	10.9842	9.86489	9.92833	6.91898	1.32821	2.26559	9.35123	9.08876	0.10528	2.49766	15.0087	8.24399	0.0483913	0.00447582	1.46135	1.46605	4.51177	6.29374	11.8081	4.38407	4.78191	1.49325	9.37592	1.05044	4.53927	2.96117	1.28479	0.345731	0.111858	13.7633	12.076	2.0814	1.56379	3.64255	1.01804	2.50894	4.36057	2.9859	2.42924	4.86261
Zfp30	7:29792643-29793714:+	3.83242	8.95846	8.35479	6.91357	0.694471	1.78001	0.994825	5.86527	7.07348	0.331031	1.2615	9.74457	6.16559	3.9412	6.39029	1.5813	0.351314	6.32376	2.3472	7.65699	3.57576	5.72877	0.845094	7.22292	1.75955	4.5986	0.0869926	0.407854	0.784179	3.38959	9.02731	7.8018	4.03808	0.850236	11.8937	0.71682	1.80388	4.02555	0.29581	1.84192	2.73971
Zfp300	X:21081711-21082875:-	1.16034	1.39589	1.14543	1.84621	0.693069	0.0204382	1.31428	0.952227	1.81116	0	0.707419	2.44118	1.15711	0	0	0.401585	0.317663	0.803595	1.34793	2.70699	0.923344	0.858429	0.0185825	1.20619	0.203997	0.901686	0.485043	1.07902	0.0375252	0	2.88185	2.53927	1.51132	0.201604	0.68656	0.187931	0.389181	0.89593	0.0795989	0.275184	0.87693
Zfp316	5:143253400-143255236:-	15.9426	18.0824	13.7163	9.64725	2.51407	12.687	3.31412	9.83956	3.40732	0.451502	1.90954	7.24415	10.1024	6.6603	13.866	11.3729	2.44954	2.40765	4.8535	7.23088	1.16119	2.84174	2.17474	4.3094	1.35215	3.50819	0.676719	1.19919	6.54091	5.59863	8.39396	6.58738	24.6179	1.44751	1.8388	5.98927	5.74575	3.28721	2.36851	2.15906	2.98254
Zfp317	9:19646896-19647967:+	4.72443	20.335	23.812	16.5843	19.8167	5.12168	23.3442	15.2774	16.0511	0.42112	21.4191	23.2304	14.8098	26.9114	11.219	8.89369	12.898	14.0053	21.8949	16.9354	12.9763	14.7277	7.82398	16.9593	12.446	13.3166	8.70384	11.6763	19.9026	84.223	19.7681	16.1656	9.63777	13.4778	7.00625	6.92579	8.47922	10.5339	13.9476	9.50113	14.01
Zfp324	7:12970761-12971496:+	8.89729	10.8784	7.40353	4.1201	8.36985	7.66667	5.87369	4.09226	8.79333	7.37382	4.37585	10.7923	4.00863	4.6125	4.84055	9.69901	6.6632	6.17104	6.51998	9.19676	6.39694	6.9816	6.52587	8.6604	5.81968	7.60857	3.16437	4.87223	4.50357	7.48227	10.3849	8.18633	11.2635	4.66022	4.83821	5.21674	5.85072	6.47426	0.852906	6.7143	5.24935
Zfp334	2:165380090-165381410:-	1.92882	12.348	12.6746	7.37544	0	1.36316	0	6.22153	9.93494	0.10528	4.70121	11.6529	6.72555	0.0206322	0.00447582	1.55671	0	5.76225	0.089339	9.04133	4.04769	5.1283	0.774402	10.0071	2.66304	5.11005	0	0	0	0	10.9858	9.31621	6.34228	5.76169	2.24312	0.594082	0.833715	3.53541	1.30035	0.401658	2.24697
Zfp345	2:150471729-150473303:-	0.211223	0.0226525	0.022275	0.0261383	10.903	0	0.379819	0.00640938	0.0316655	0	13.8848	0.0124423	0	9.60808	4.5614	0	0.115516	0.0823992	0.112381	0.0513253	0.0288138	0.10246	0	0.0711526	0.0955978	0.0704814	0.0738717	0.401061	0.147414	2.74869	0.0461424	0.0632403	1.57232	2.39947	0.0467605	0	0.00776598	0.0502915	0.0360674	0.145837	0.0654201
Zfp354a	11:51069521-51070667:+	3.14852	8.26904	9.48887	7.41989	0	1.80417	0	7.0577	6.94482	0.10528	6.25098	8.38894	7.5661	0.0285073	0.00588081	2.48273	0.243192	5.13855	1.57488	7.13253	5.44111	7.53312	1.35347	6.71779	3.37829	5.69461	0.0468729	0	0.00467109	0.0342442	8.72151	7.56177	6.01693	4.24295	5.48926	3.58928	1.36252	4.36678	1.08794	0.462008	4.45857
Zfp354b	11:50922329-50923475:-	0.786064	1.88481	1.7214	2.45179	0.0585638	0.11647	0.118375	2.08982	1.27915	0.120471	0.732392	2.10441	1.84586	0.0277591	0	0.502701	0.0516037	0.848086	0.410649	2.06953	0.813115	1.13198	0.0458499	1.05902	0.725844	1.00885	0.026956	0.0718567	0.130494	0.0214268	2.20257	2.43013	1.31623	0.398449	1.49056	0.222647	0.33377	0.945515	2.35522	0.178138	1.46466
Zfp354c	11:50814686-50815589:-	4.39246	24.1882	23.7233	12.5418	1.8032	1.12979	1.77602	12.3145	34.1635	0.94752	11.0872	36.5898	13.4537	0.0142537	0.00447582	1.37376	1.05728	12.5483	4.64174	33.7791	12.932	15.1764	0.523127	37.9971	2.46205	13.8591	0.13276	0.768699	4.88476	4.33686	37.7439	35.334	9.45993	5.25509	10.4084	1.13329	3.58043	14.217	2.24374	6.359	8.74587
Zfp369	13:65297150-65297549:+	3.08254	11.5981	11.7837	8.71847	8.18543	4.0126	28.0111	10.1386	7.63412	1.3545	22.8227	11.0578	9.09134	26.1007	14.5463	5.89517	30.3951	7.49141	38.8369	8.845	5.01018	5.83988	3.97536	8.24838	6.98817	6.05851	13.5971	25.2108	28.1226	18.5794	9.4875	7.67309	5.14663	5.03735	3.9132	2.99845	6.40711	5.35147	3.41855	12.5316	5.609
Zfp37	4:62191193-62192180:-	3.63536	12.4109	10.3935	6.53433	0	0.494637	0	7.03346	10.6173	0	4.10689	14.8063	7.66508	0.0270108	0	0.867604	0.103357	5.95076	0.484155	16.885	5.27717	5.87587	0.487997	10.4778	1.06533	5.5303	0	0.42917	0	0	19.9548	17.668	6.19452	3.35276	3.19854	0.991876	1.09225	4.6096	35.0163	0.357648	5.79954
Zfp382	7:30133903-30134638:+	2.36802	7.04293	7.12221	5.81198	5.90247	1.44445	5.67966	7.6113	8.56995	1.98619	5.05838	13.4728	6.66426	5.65172	7.5564	1.4134	9.62635	8.72441	6.90894	10.9459	4.79933	5.30007	0.973526	8.187	2.23146	6.99712	11.1918	5.11345	6.05723	9.51996	12.4221	10.2778	2.27275	2.91952	5.22869	0.351004	2.71491	4.91038	5.7903	9.49125	4.06956
Zfp383	7:29914879-29915782:+	2.06752	12.8565	10.9057	9.35395	4.04281	0.485143	2.04727	6.53974	5.7003	0	4.43855	5.38805	6.53737	0.611403	0.300177	2.25446	1.57348	3.71436	2.50489	4.61781	2.85098	3.62829	0.761884	6.37575	1.61245	3.39376	1.53247	0.969957	0.707726	0.762406	5.60396	4.40532	5.71242	5.00459	6.52593	1.22199	1.10277	2.97223	1.17819	0.714699	5.02538
Zfp386	12:116059803-116060538:+	20.0992	27.5831	31.2913	21.1784	29.419	5.98676	48.0008	20.7411	41.0945	0.120471	25.6832	45.2216	22.4454	35.5736	16.7092	17.0246	41.3103	30.0767	60.8096	35.5196	26.9893	32.5183	6.13399	37.1579	12.651	27.7404	55.8498	45.4941	21.6785	39.3587	42.2616	37.406	26.8417	18.703	39.8389	41.432	11.2682	24.6845	8.78105	29.2797	27.6118
Zfp39	11:58889801-58891037:-	2.01239	3.64562	3.99365	3.97612	7.41672	0.776182	12.783	4.05966	4.8651	2.16742	2.76086	5.31139	4.33075	9.2116	5.95711	1.45199	11.7936	3.89452	8.28153	4.40381	3.55774	3.94687	0.907296	5.21513	9.11683	3.73117	12.2214	19.3938	14.6406	7.52471	4.64402	4.73319	2.42083	3.9407	4.18586	0.791545	5.39638	3.17619	37.2806	4.9282	3.20092
Zfp398	6:47866050-47866788:+	10.6299	13.9036	9.95887	13.1206	2.04725	10.7468	17.3537	9.46048	7.02559	0.993093	3.54653	9.8248	9.00773	16.2094	16.5553	8.34853	20.4679	4.20316	15.6513	10.4934	5.45274	7.18586	7.47048	8.16933	4.8285	7.20128	11.1665	17.7164	15.5239	6.634	11.3694	10.0958	20.0824	4.22673	4.26286	6.93536	14.9919	6.7139	8.17406	19.1712	5.15864
Zfp40	17:23175200-23176933:-	3.73873	12.6516	13.9775	6.04672	6.28342	0.461684	14.2431	12.5703	10.7244	0.331031	4.02254	20.2283	10.6883	9.84337	6.3169	2.45309	9.6825	8.20812	16.4479	15.1974	6.69299	6.91692	0.703516	9.34891	3.22664	8.14063	8.55081	12.6905	9.03928	1.48023	17.6156	15.1615	8.27426	4.24435	4.95281	4.00916	2.73154	6.98864	0.512022	4.77087	5.19526
Zfp418	7:7181810-7182965:+	0.450905	2.10156	1.9009	2.67147	1.82009	0.561522	2.81357	1.83129	2.02517	0	2.95795	2.2709	1.51916	1.44842	1.24788	0.790293	2.35978	1.13406	2.90557	1.86484	1.57128	1.44922	0.957802	2.10869	0.792402	1.64974	1.84408	2.5556	1.75959	0.546103	2.06905	1.76757	1.64617	1.43184	0.723282	1.59964	0.724092	1.45465	0.130402	0.852305	1.50245
Zfp426	9:20469997-20470987:-	9.19717	19.5421	19.4354	15.7108	18.5025	3.49557	19.5021	12.647	17.9307	6.12776	8.6677	24.9098	12.7482	20.9907	26.8399	7.37586	19.0762	12.2694	21.6603	22.3927	13.4033	13.5698	5.15862	16.0201	12.2716	15.2955	22.5116	21.4847	13.359	49.1992	23.8098	22.4209	16.249	12.3634	9.35879	14.4325	9.00685	11.6523	11.5437	12.0574	13.5917
Zfp429	13:67389807-67390963:-	2.23677	1.83939	2.36955	1.3304	12.3173	0.383344	4.83653	1.6904	3.17098	0.436311	0.80767	1.94761	1.42866	1.31698	0.591476	0.654301	6.97766	2.48972	3.81119	1.70941	4.33411	3.60193	1.41276	3.37348	2.95161	3.68254	17.4793	8.5131	2.9147	0.201946	1.79856	1.88229	5.4483	5.85709	2.45551	8.6183	1.94595	3.25299	0.17374	4.05814	4.08615
Zfp433	10:81719986-81721556:+	7.87973	4.84494	6.27782	4.73	9.93038	0.310104	16.132	3.95361	14.8209	0.94752	4.72331	15.7454	3.94989	6.68802	2.96076	0.785619	11.9539	11.2577	12.11	13.3143	12.4057	13.1129	0.847714	13.7879	7.21971	13.7357	13.4957	16.314	6.04932	4.17139	14.6534	15.7987	7.30661	7.26927	10.9054	7.72562	5.2433	11.1004	1.35318	11.1046	8.4153
Zfp442	2:150408018-150409749:-	1.69386	1.0259	1.34705	1.10374	2.94248	0.0619031	3.48933	0.912063	5.80321	0	6.09422	5.62379	1.02364	0.294287	0.0755122	0.388064	4.53992	4.06869	6.28363	4.8241	4.25306	6.05921	0.266415	6.01839	1.79386	4.27294	2.73665	3.80079	1.46664	0	5.65938	5.83394	6.51359	1.50399	3.44882	11.7551	0.61683	4.29809	0.657834	0.984954	2.38297
Zfp445	9:122851925-122853461:-	8.54976	32.0632	43.1044	37.3925	25.6601	3.78776	46.9683	33.8429	34.099	0.707634	28.212	41.6191	35.3324	41.3383	34.7207	8.74373	31.3162	22.4073	53.1754	37.4054	21.6245	22.456	5.76487	34.274	20.8343	25.0709	28.9093	26.8851	26.9146	33.8021	43.4011	37.3868	17.5555	15.0046	12.4991	21.7418	9.64334	21.1208	10.3335	13.9935	19.1404
Zfp446	7:12982363-12982657:+	6.88936	11.0143	9.33586	10.0086	12.3717	4.28877	3.28825	6.72859	7.07848	6.33516	6.02883	9.00627	9.54646	5.43387	7.39551	7.12062	5.79492	6.26164	4.19151	8.46947	5.20718	8.01402	4.23376	7.91518	5.81919	7.35836	1.75542	3.52558	6.1184	3.99095	10.0425	7.43824	7.04385	4.84465	3.69161	2.71699	6.25213	5.51182	10.9622	8.31559	4.73631
Zfp454	11:50873007-50874027:-	1.804	7.98445	8.34854	4.8573	0	0.3276	0	3.75552	9.19367	0	2.54788	10.4447	3.94903	0.0206322	0.00320788	0.814536	0	2.76182	0	7.76727	3.69685	5.36831	0.379318	9.04314	1.03749	4.51738	0	0	0.110428	0	10.0061	8.4501	1.70375	0.597951	2.28955	0.22305	0.411555	3.59004	0.31151	0.223204	1.63166
Zfp455	13:67206999-67207986:+	0.834748	1.07873	1.08333	0.656789	3.90186	0.138085	4.52805	1.0082	1.70582	0.240942	0.450772	1.57175	1.067	2.05259	1.02825	0.280763	5.11073	0.943842	4.11794	1.18507	1.39526	1.19573	0.387613	1.58976	0.875139	1.27678	2.99723	2.79552	1.48156	0.382303	1.42339	1.4088	3.59794	1.14816	0.851351	1.63876	0.608022	1.15742	0.187994	0.915829	1.26903
Zfp456	13:67366277-67367264:-	0.392718	0.264245	0.389552	0.368036	6.67368	0.137693	3.56615	0.400005	1.01859	0.602354	1.5088	0.457814	0.378902	3.9763	3.21109	0.467598	4.28444	1.04141	4.46307	0.524855	1.40595	1.07584	0.431037	0.977784	0.953075	1.21605	4.94414	4.30106	1.73526	0.519943	0.522505	0.612776	2.60276	0.81241	0.573799	2.79017	0.821939	1.23705	0.0939487	1.00408	0.654797
Zfp457	13:67291647-67294263:-	0.517338	1.4687	1.38333	2.09249	0.66705	1.06691	1.90851	2.02223	0.478676	0	0.622888	0.547509	2.19672	2.71104	1.34098	1.63411	1.51327	0.960255	0.561904	0.681401	0.612524	1.02725	0.89599	0.474271	1.06036	0.524478	0.305534	0.546545	1.6892	1.6161	0.582556	0.630549	0.969299	0.598228	0.722906	0.853982	1.20341	0.541388	1.56164	1.43437	1.03831
Zfp458	13:67255286-67258127:-	0.408776	1.66757	1.22345	1.53918	1.63304	0.0275779	1.92967	1.6593	0.909797	0	0.923373	2.8088	1.35937	3.35235	2.00319	0.378572	3.12083	0.747748	1.35083	2.11897	0.774413	0.734101	0.111495	0.804596	0.517266	0.594792	2.77657	3.38558	2.33912	1.63898	2.49749	2.21607	1.48992	0.656728	0.355179	1.41268	0.331872	0.683413	1.51074	0.386934	0.671273
Zfp459	13:67407994-67408641:-	0.0516684	0.365857	0.514425	0.365121	0.188565	0.266482	1.34172	1.5177	0.357722	0	7.86641	0.46016	0.878855	0.0138795	0.00249387	0.317297	0.433746	0.161046	0.891906	0.274217	0.810486	0.382907	0.647963	0.474924	0.151709	0.414986	0.45547	0.367548	0.739906	0	0.341865	0.216321	0.612686	0.496036	0.123175	1.10503	0.322771	0.468794	0.115666	0.756467	0.661843
Zfp46	4:136290219-136291206:+	11.3854	45.8697	36.2676	19.195	6.62866	18.2726	8.58338	46.7724	19.0675	5.47878	5.19924	28.8379	43.2571	12.9489	9.88285	27.1169	7.509	24.8115	8.33257	26.4392	13.2356	14.5849	13.2177	21.4459	6.76075	22.8568	6.15063	6.93067	8.3533	10.2643	27.1996	25.9831	18.2622	12.6736	21.4728	10.061	13.3074	15.8173	6.50273	12.0984	28.2096
Zfp472	17:32977546-32978533:+	4.67066	3.27105	3.99467	3.18793	20.8805	0.391857	14.6879	2.19924	9.01319	0.767342	6.60132	7.73331	2.45104	6.78086	4.23962	1.387	12.5164	5.28993	11.0084	5.61703	8.8385	6.80631	2.58016	8.43566	7.62659	7.19296	17.656	19.3105	11.1004	12.081	6.63245	6.30432	3.85631	4.49783	4.78812	6.52627	5.41202	6.97884	0.816164	10.4227	5.07766
Zfp473	7:44732246-44734277:-	0.144493	0.762887	1.10912	0.516142	11.2995	0.273229	2.05001	0.270861	1.7003	1.27961	15.2728	1.34397	0.403222	2.47287	2.00311	0.123553	2.94799	0.613042	2.71459	1.21516	1.74733	1.2838	0.782069	1.68542	1.75706	1.02137	1.90342	1.4165	1.32035	1.0383	1.30601	1.07498	0.855681	11.4935	0.189552	0.338211	0.540725	1.10628	2.2162	1.13283	0.331687
Zfp493	13:67786175-67787668:+	1.14123	1.48635	1.98046	1.97255	0	0.807173	2.40004	1.94133	2.10657	0.10528	4.63267	2.26456	1.92972	1.64755	0.395903	0.383606	2.96579	1.48181	2.98827	1.8089	1.86038	1.75777	1.0693	1.89883	1.55013	1.67778	1.26944	3.10146	3.89542	0	2.1423	1.7709	2.4238	1.0574	0.599982	1.43659	1.12589	1.45292	0.411284	1.12301	1.22285
Zfp51	17:21463769-21465431:+	6.66485	4.05967	4.36651	3.08211	12.1541	0.506562	12.4345	2.39301	11.3568	0.797723	6.23508	8.71985	2.43221	11.756	7.36405	1.29263	9.38624	10.1426	14.8329	8.03787	11.5022	10.2309	1.50558	10.9589	9.31788	9.48331	17.0954	16.2183	7.13087	6.05249	9.12721	9.24606	10.8426	8.14182	8.20668	12.8283	5.17632	9.19645	3.66535	11.9484	7.63688
Zfp52	17:21560452-21562027:+	10.0899	0.962319	1.63232	2.72217	13.8585	0.205755	35.9563	2.06903	3.09099	0.10528	3.01742	1.66681	2.24753	4.38031	2.17649	1.262	27.6299	3.61144	36.2879	1.70899	3.34217	3.31055	0.500516	2.92178	1.6791	3.32195	29.2966	32.7821	10.7257	3.79922	1.47628	1.51322	18.9117	3.01726	2.55945	4.06248	2.23726	3.55365	0.2896	2.37028	4.70986
Zfp53	17:21508387-21509709:+	3.55745	2.91035	3.74732	2.37471	7.82176	0.458154	10.0642	2.06429	7.78528	0.10528	4.63249	7.59021	2.23531	7.4403	7.50565	1.4469	11.6393	5.78027	14.6809	6.51376	10.9934	8.01882	2.12545	7.69173	5.99314	7.96049	24.6031	15.4834	3.43234	2.70362	7.28985	7.01354	8.71779	4.55089	6.46203	14.0932	4.16855	9.15994	0.470419	9.49459	8.3411
Zfp534	4:147674248-147675487:-	0	0	0.00151533	0	0	0	0.0184227	0	0.0037235	0.120471	58.9184	0.00169258	0	4.77357	1.32318	0	0.109672	0.00346005	0.619578	0.0046843	0.00740204	0.00663876	0	0.00218916	0.00402196	0.0012747	0	0.0462277	0.00423313	0	0.00833087	0.00716755	0.395118	0.039369	0	0	0.0104052	0.00675278	0.173644	0.0119353	0.00315539
Zfp54	17:21433881-21434964:+	3.35107	1.65466	2.07172	1.11195	11.3355	1.03152	5.11327	0.787191	2.94005	0	2.66681	2.66933	0.68097	6.90985	3.86454	1.26618	6.46505	3.23501	5.00765	2.75671	5.65268	4.02265	2.30705	2.8326	3.38841	4.4671	7.60775	8.3691	3.88376	2.00078	2.94751	3.25384	3.53464	4.57225	1.8552	9.52025	2.34564	4.48836	4.64206	5.37351	5.04299
Zfp551	7:12415395-12416634:-	2.52726	3.56726	3.84276	2.35407	2.63823	0.621268	4.68993	2.31841	3.84774	0	3.17085	6.14055	2.44559	1.82152	1.09511	1.62317	1.50711	3.17738	5.36148	6.51945	3.05298	3.00912	0.51808	4.02195	1.73752	2.5861	0.187834	1.26672	2.02242	0.0100753	6.59451	5.35281	1.60015	1.70665	2.64879	0.543988	1.05806	2.60508	0.497865	2.33949	1.80866
Zfp558	9:18456281-18457019:-	1.21259	21.4954	16.4327	0.908424	0	0.287116	1.48753	1.07757	7.08274	0.10528	2.10654	24.7331	1.49268	1.83833	0.611856	0.551753	3.75305	3.35872	2.52157	19.171	2.87455	3.64126	0.237934	7.01545	1.12775	3.44832	0.597617	2.32116	1.76461	0.0445459	24.9139	17.4408	3.6957	1.1963	1.37299	1.10249	0.651511	2.51873	21.1686	0.884264	1.32757
Zfp560	9:20347485-20348724:-	48.0407	17.2009	20.0303	12.3658	19.4367	1.67974	3.70961	14.4718	23.7233	1.24922	10.0286	35.3128	12.7286	13.3983	7.90786	10.2327	15.333	30.18	4.77646	25.669	26.5109	24.7801	4.4764	22.9343	17.415	26.0286	6.15846	14.3809	11.1171	40.8156	27.8207	25.1798	6.06299	10.4703	42.2283	5.14922	17.9819	24.1872	29.4378	32.0087	31.1987
Zfp563	17:33104861-33105761:+	3.69716	10.1342	10.8984	8.01117	5.41562	1.13536	6.3127	6.0083	8.19696	0	3.96604	15.5495	6.12094	7.07128	4.29705	1.8397	4.49732	5.40423	5.13954	13.0191	5.62245	5.69274	1.72493	8.1523	3.38562	6.72718	5.02268	6.63564	5.19664	2.91204	15.3011	14.2242	6.2273	4.55553	4.73381	4.76671	2.45171	5.74679	3.07248	5.83767	4.82804
Zfp566	7:30077683-30078250:-	3.06992	7.07398	8.41018	3.95966	6.30379	1.53145	4.60292	4.54842	10.8476	0	13.0876	11.8388	4.53324	3.70812	2.76624	2.74003	8.37564	5.71046	5.67918	9.57252	5.14957	8.10829	1.76292	12.0451	3.37518	5.4374	2.74352	8.08451	7.43736	8.76318	11.2636	10.5917	2.03573	2.37908	7.08254	1.20303	4.129	4.85975	0.764205	7.37822	3.73777
Zfp568	7:30022723-30023626:+	1.73632	4.49814	7.19756	2.06673	12.4635	3.49768	15.9587	1.51675	12.2902	0.556782	79.3894	4.05711	1.65277	14.1332	11.6076	3.4224	23.2505	16.6206	11.0486	4.41367	8.02656	7.53728	4.41493	15.8786	13.5453	7.04194	8.73966	20.6492	11.4817	15.184	4.57149	4.5774	5.23219	59.782	31.2715	3.51342	4.16643	7.22228	2.32394	3.22726	7.0258
Zfp57	17:37009678-37010113:+	8.63726	265.944	258.754	7.63838	0.0992591	2.25087	1.65843	19.034	73.7321	0.120471	345.553	158.06	24.122	0.0967826	0.0134275	4.32876	0.449531	39.9108	7.63312	131.177	39.8975	33.5416	2.86652	82.8946	9.4645	48.7288	0.0146045	0.114741	0.461333	0.0214268	148.051	142.539	18.4968	63.1857	13.8267	2.13062	6.54964	30.795	20.5972	2.24822	28.2925
Zfp58	13:67490906-67492049:-	2.94277	3.96632	4.8049	5.06547	6.08718	0.567681	6.66234	3.91279	13.6564	0.21056	4.0847	9.02345	3.8673	11.0076	7.52939	1.20037	8.89833	7.97347	11.6043	7.81322	8.14739	9.14095	1.33712	13.0149	4.73606	8.05477	8.64379	10.4745	3.96048	5.52993	9.04407	8.56017	9.93835	4.16011	5.89672	5.60524	2.88232	7.63301	3.85113	6.47662	6.02723
Zfp583	7:6316388-6317375:-	3.27274	6.99156	7.39865	4.24591	0	0.358395	2.77163	5.43287	5.53821	0.346222	2.90172	7.57534	5.05271	1.00441	0.340933	0.987422	3.62544	3.9459	3.51497	8.63313	2.99933	3.17695	0.157345	5.36984	1.72188	3.86377	1.26138	3.4021	3.66088	0	8.28181	8.39006	4.5586	3.14084	2.50022	0.89438	1.87322	2.83318	1.87276	1.86331	2.85361
Zfp59	7:27853643-27855706:+	2.14461	3.93856	4.23701	2.86781	5.84342	0.560933	3.8958	2.23735	6.32482	0	13.4531	7.32113	2.3253	5.42499	3.43545	1.35793	3.63596	4.5874	7.53721	6.02803	4.69735	4.2706	1.15634	5.94297	2.80999	4.77621	2.42336	4.85406	4.58059	7.30183	6.77101	5.97319	2.1066	3.04739	3.36893	1.96363	1.50673	3.61183	2.92666	2.22991	3.0658
Zfp595	13:67316385-67317960:-	0.773511	1.63672	1.7689	1.63732	8.58621	0.390288	6.55493	1.73752	1.87517	0.21056	3.27119	1.37038	1.80892	7.61787	4.28765	0.948373	6.92738	1.58368	6.80164	1.17816	1.88754	1.68135	1.24401	2.11803	2.49016	1.86822	11.0796	6.09708	5.27281	3.79013	1.23073	1.20555	5.31719	2.71584	0.829351	6.4884	1.51301	1.65026	0.556518	2.14882	3.14746
Zfp597	16:3865648-3866422:-	4.44055	10.7403	9.60666	9.70516	16.2313	2.21518	8.05618	8.05501	4.62995	1.20471	8.08182	11.055	7.41887	15.4397	11.6837	2.5798	8.96481	5.6099	13.2667	9.58822	3.79308	3.68238	2.64314	4.56318	5.8026	4.96066	14.9621	9.45586	8.89319	13.0724	12.5562	8.19006	5.45725	11.7758	4.76313	5.26416	4.58851	4.12208	16.1407	6.16261	5.07757
Zfp599	9:22249275-22250264:-	0.514684	2.99175	2.93645	2.07296	2.84887	0.402606	10.185	1.35365	4.89305	0	8.93324	7.08936	1.03628	1.9233	0.794508	0.263935	4.20603	3.56905	9.5573	4.65003	3.29412	3.02344	0.889536	5.8686	2.26943	2.91421	0.884208	6.78515	5.08823	13.974	6.41424	4.35221	0.64665	1.49772	0.288092	1.68204	1.40919	2.22584	0.0432423	3.99032	0.506505
Zfp60	7:27748430-27750329:+	8.9036	30.2525	24.7038	10.9955	9.38124	1.07209	10.711	11.6514	34.6302	0.225751	10.3074	66.9911	12.7245	8.48637	6.75335	3.14047	11.9354	17.14	10.0709	56.6923	17.7283	20.9937	1.72958	28.4445	8.08686	20.0308	4.90551	7.97015	6.15014	8.75793	66.053	61.1462	11.796	5.28357	12.559	4.1905	5.00851	16.3417	9.92251	7.95578	8.39333
Zfp600	4:146195519-146197681:+	0.00354193	0	0.124816	0.026971	0	0	0.976403	0	0.0281287	0.240942	143.485	0.00942478	0	0.218681	0.0268549	0.0168281	0.00645046	0.0561927	1.32567	0.020401	0.0139317	0.0280332	0	0.0392919	0.118164	0.00370559	0	0.520994	0	0.444424	0.0132478	0.00878677	0.175155	0.0457967	0	0	0.00375218	0.0349363	0.0433387	0.0359114	0.0548973
Zfp605	5:110127620-110129084:+	2.53239	5.53077	6.24605	4.97543	5.78695	0.171234	11.4746	4.76882	3.99696	0.331031	7.23049	10.8864	5.26087	5.70817	4.59658	1.86337	6.32855	2.44729	10.5924	8.28139	2.83641	3.23964	0.534042	3.38519	2.23065	2.61344	4.84159	6.33326	5.33623	4.9737	9.66148	8.13388	3.60553	3.71518	2.41544	2.13684	2.13789	2.37856	0.245972	2.85617	2.77469
Zfp606	7:12493168-12494320:+	8.9833	13.4009	13.5354	7.3949	6.00261	3.54597	11.6713	4.96388	22.7397	0.722825	7.30604	33.5228	5.95011	14.707	16.1764	3.43332	10.1327	15.2684	14.9332	27.5739	11.8058	15.525	2.36018	20.915	6.20642	14.3822	5.54394	10.7382	5.06858	3.73764	34.5607	26.7267	15.5194	4.36798	10.9548	6.9006	4.91991	11.1302	1.45344	10.2223	6.64027
Zfp607	7:27878028-27879828:+	1.7044	0.966519	1.2024	0.484193	8.80667	0.38511	8.79113	0.634068	3.23183	0	3.68415	1.99834	0.540943	10.7968	5.06409	1.07918	5.40575	3.90325	7.21455	1.33313	3.27733	2.64967	0.863871	3.02786	2.3175	2.98378	6.78991	7.28196	5.82341	6.30019	1.5246	1.24868	1.90088	0.983423	2.57367	1.3903	1.81907	2.90471	4.17087	3.62893	2.51569
Zfp61	7:24291137-24291788:-	7.80572	26.0705	32.9157	23.4699	3.20292	5.60855	14.5774	17.567	34.4911	1.48911	22.5415	30.3701	18.9734	12.9313	15.2441	8.69123	16.1562	14.1669	17.7968	25.0528	16.3112	22.224	5.85776	36.3017	5.88178	20.6644	7.36512	13.4898	13.5012	13.3274	27.2543	26.0657	6.3303	7.17257	13.6742	2.90226	8.98158	18.5945	14.9733	21.7038	13.622
Zfp612	8:110088840-110090163:+	2.52782	8.28783	7.55898	22.615	0.938809	2.33616	0.110536	15.1795	7.47616	0.10528	2.91115	12.8057	11.2187	0.0273849	0.00147388	4.79627	0	6.73142	1.54534	11.5028	4.3216	5.3227	1.65768	7.86153	2.73958	4.02993	0	0.0310062	0.00450725	0	12.8991	12.6659	2.27065	2.09948	7.84154	1.50083	0.319956	4.51825	5.95416	0.850053	5.2656
Zfp616	11:74084181-74086564:+	0	0	0	0	0	0	0	0	0.000769677	0	0.0219187	0	0	0.0210064	0.0064761	0	0	0	0	0.000466801	0.0103798	0.0554306	0	0	0	0	0	0	0.00695561	0	0	0	1.06723	0	0	0	0	0.00141878	0.0216212	0	0
Zfp617	8:71932331-71933486:+	9.00699	14.0508	15.8038	14.5888	19.2756	2.24556	10.8325	14.0904	19.9231	4.25888	13.2843	23.5416	14.9039	22.3187	22.3533	4.62268	11.0308	25.5516	12.1992	22.3199	16.8531	15.7361	5.44969	19.6234	15.3421	14.3425	19.7472	16.3835	12.9552	17.3384	24.4839	23.6512	21.3186	11.669	19.2884	41.5502	6.66872	14.1178	2.5461	8.57492	15.4298
Zfp619	7:39535204-39538027:+	0.366827	3.00981	2.33143	1.83191	1.03204	0.185513	3.01308	1.44066	1.93338	0	3.37127	2.73201	1.61247	1.20988	0.738386	0.529596	3.10055	1.51575	3.61152	2.13505	1.13589	1.36976	0.318524	1.87536	0.869706	1.47863	4.6201	3.30713	2.11108	1.09608	3.06179	2.09915	1.32533	1.03493	0.868332	0.48178	0.665464	1.06259	0.187897	0.36005	1.20423
Zfp640	13:66669946-66671353:-	0	0	0	0	0	0	0	0	0	0	45.0643	0	0	0.0341376	0	0	0	0	0	0	0	0	0	0	0	0	0	0	0	0	0	0	0.142568	0.0382566	0	0	0	0	0.174126	0	0
Zfp641	15:98288522-98288987:-	2.43887	8.06437	6.43538	7.52771	0.0264331	0.748016	0	8.17875	0.635968	0.361412	0.172116	3.30288	8.2256	0.0067527	0.00160394	2.59908	0	1.91942	0	5.65479	0.355098	1.7478	0.603521	0.384274	0.300662	2.54137	0.0316337	0	0	0	6.51295	4.95532	1.88814	0.656324	4.24458	0.646744	0.220223	0.480174	1.00329	0.481569	11.4357
Zfp647	15:76910862-76911933:-	3.46382	25.6164	21.528	5.76645	4.28489	2.35063	3.62103	3.40512	16.138	0.887813	5.58111	20.2559	4.93374	2.86254	1.21087	2.94514	2.81524	6.05873	3.01286	13.6085	6.20914	8.95756	1.54517	17.963	2.6084	9.12621	0.522462	2.68594	4.85424	4.63246	16.1239	14.8663	7.02508	1.94515	3.00146	1.10307	2.8027	5.33597	0.497479	3.97964	3.11267
Zfp65	13:67705768-67708912:-	2.16978	5.82497	5.69276	2.99459	11.0187	0.481142	14.405	3.27064	4.4396	0.466692	18.7409	7.26851	3.04007	10.4772	7.89821	1.28919	11.5506	3.17936	18.3364	4.70858	3.28238	3.79897	1.19452	4.54135	3.56903	3.05222	13.2474	16.5353	8.09364	5.64404	5.54426	4.52475	12.2856	4.35513	2.98782	7.37343	1.91713	2.93768	1.92833	2.43846	4.11154
Zfp655	5:145243226-145245048:+	26.4868	12.0767	11.741	16.2148	22.0848	13.1685	35.8807	13.1419	24.2487	21.8685	25.1285	23.7848	11.8069	80.3401	123.295	18.0287	21.4231	29.5299	36.1751	21.3599	29.3542	22.1414	17.8351	21.1826	33.189	22.915	25.7946	30.697	32.3467	35.9499	23.437	22.7676	31.6432	76.301	38.4163	27.7862	19.0578	19.777	6.09437	22.1022	28.8153
Zfp658	7:43573127-43575156:+	1.35758	8.14356	8.31161	7.26448	3.4228	0.936667	1.2061	4.19628	3.74906	0	1.71218	6.17976	6.40318	0.813201	0.379757	2.02936	1.43002	1.34014	4.69362	5.06969	2.02908	2.11165	1.54274	3.69397	0.786558	2.84465	7.70866	1.0159	0.685895	0	5.95012	5.47702	1.55507	1.40937	1.34263	0.82799	1.96754	2.02365	0.259839	1.31495	2.46009
Zfp661	2:127576973-127577708:-	1.73207	6.93607	7.45671	4.14645	5.95305	2.8357	1.79954	7.2486	4.6988	0	6.07608	6.25068	6.23779	3.68159	2.27231	3.76902	4.37142	2.50069	2.81545	4.83165	2.55901	3.48206	3.39188	4.48307	3.30808	3.02958	1.37935	3.51684	3.72716	4.17608	5.49792	5.43786	3.06827	1.12597	2.34346	1.97092	2.24042	2.7644	7.35092	2.2728	3.79849
Zfp663	2:165352392-165352878:-	0.242196	4.9355	4.35346	0.0105802	0	0	0	0.020416	1.4424	0	0.194125	4.58644	0.358154	0.0345118	0	0	0	0.184595	0	3.8703	0.636627	0.564178	0	0.581048	0.085403	1.18058	0	0	0	0	5.81451	3.54558	0.127183	0.0938182	0.290601	0.00574664	0.148642	0.386157	0.0363566	0.038751	0.0161551
Zfp667	7:6304769-6306146:+	4.22952	4.81926	5.30387	5.7311	0.585837	0.328973	5.56756	5.17957	6.3477	1.70073	2.35402	9.01574	5.09014	7.99557	12.0266	1.47487	2.85558	4.14321	8.56645	10.0112	4.42303	3.41924	0.36903	5.9955	7.299	4.24677	1.39702	2.39454	2.29141	5.00541	9.05546	10.4364	3.5706	20.5502	12.8201	0.951654	3.04915	5.20524	3.61732	6.6625	10.1304
Zfp677	17:21397240-21399160:+	2.92196	1.70222	1.88572	1.25332	3.26353	0.18414	12.5372	0.748141	2.68578	0	1.77784	2.67547	1.13872	0.0138795	0	0.48357	9.75388	1.86004	15.3742	2.71685	2.36908	2.45032	0.24036	2.51673	1.13395	1.76641	11.127	9.5131	4.42993	0	2.85036	2.994	7.48678	0.831105	1.66552	3.46884	1.24885	2.17936	0.614785	2.81572	3.55434
Zfp68	5:138606370-138607105:-	18.4452	28.7517	29.2332	19.6469	24.5405	4.37049	58.5574	13.8172	48.6555	1.3697	7.38375	58.8748	15.6361	33.1914	12.2015	7.00975	36.1696	37.1744	69.9678	44.4409	36.5437	35.9514	6.22855	48.5795	21.5895	43.6203	44.8827	44.0578	25.553	18.9538	48.168	47.7161	27.5747	11.0335	38.5543	17.5377	15.6736	34.6242	2.49183	29.2028	29.2301
Zfp689	7:127444019-127444922:-	10.7004	15.8242	11.6419	6.38602	4.7656	9.99206	3.8033	5.27464	10.2416	71.9725	4.166	12.2372	6.2764	13.0388	18.2741	5.85259	2.75673	5.68899	3.39976	11.0315	5.50566	6.60945	5.83531	12.6037	5.38489	7.04473	1.54149	2.67751	9.15011	6.49855	12.1992	11.9952	10.7806	3.6374	3.94344	6.1215	10.4062	5.79403	27.2115	10.0772	3.91078
Zfp69	4:120930406-120931141:-	3.66677	2.54113	3.49513	1.67899	0.827133	2.94185	3.96008	1.28037	6.8001	1.49017	3.44017	4.78999	1.2323	4.652	4.21337	1.48321	0.715644	11.0048	3.15549	5.05448	4.3112	5.84001	1.74613	7.43062	3.43913	6.27705	1.49317	2.14387	5.4811	2.65909	5.44667	5.60634	1.72855	2.45102	2.70642	2.25649	4.13722	3.569	2.66042	3.0891	2.19591
Zfp7	15:76890338-76891808:+	1.67293	9.01654	10.2633	9.0642	8.06253	5.89692	8.33683	5.53315	7.18353	0.451502	27.0395	7.35317	4.52719	9.20641	7.3217	5.10668	5.83413	3.78055	5.91115	5.80361	6.04145	10.1585	7.36854	7.34611	5.72859	7.18537	5.60062	5.59525	8.48711	10.2386	6.17503	6.31211	3.73453	12.3363	1.199	4.87544	3.98524	5.9545	1.96353	8.79715	8.91494
Zfp707	15:75974690-75975257:+	14.8933	14.8807	13.9034	12.7042	7.23352	31.8813	6.11162	12.7127	13.4398	7.69072	12.2892	16.9482	11.6707	5.12737	14.448	10.9475	5.33344	10.5457	6.20285	14.5245	15.5966	14.4982	17.4306	15.1333	18.4323	15.4801	2.26606	3.66645	8.54656	13.7239	15.5321	15.4096	13.0461	9.74952	10.5079	14.1528	15.8362	18.7391	7.44934	28.3964	13.9475
Zfp709	8:71889406-71890897:+	2.67781	2.2029	2.11132	2.3964	3.59322	0.207128	7.56229	1.99035	5.02276	0.120471	2.93298	5.13755	1.87	7.49926	7.08082	1.35822	7.80727	4.05574	6.34194	4.58547	4.6367	3.58978	0.509395	3.86693	2.97391	3.9226	9.72029	7.01515	4.56512	7.42504	5.52751	4.57375	6.62889	3.20799	3.59855	2.9273	2.1226	3.40062	0.317914	4.49325	3.23825
Zfp712	13:67040391-67042131:-	0.924813	2.28284	2.27092	2.21142	1.48	0.0890887	5.73846	1.62601	3.25438	0.21056	0.488321	5.04155	1.82943	4.57165	2.09586	0.204387	3.27655	2.20186	5.00129	3.87642	2.26499	2.22232	0.242786	3.19354	1.34528	2.61289	5.44315	4.80344	2.48827	1.2788	4.55583	4.26691	3.49141	1.04624	1.62294	1.86642	0.890885	2.12204	1.19418	2.14599	1.32329
Zfp715	7:43297651-43299463:-	7.06584	10.7543	11.6686	12.4885	15.2304	3.03004	23.4477	10.715	10.8268	0.541591	11.3313	14.2886	11.5515	13.1134	13.6142	5.5852	16.7638	10.7039	19.2709	12.1177	8.4388	8.99205	3.87623	11.0171	10.5037	10.2692	22.502	22.945	10.4677	11.1221	13.8123	12.1081	9.4061	10.7549	13.6374	9.71874	6.71826	7.60075	8.63119	7.79603	8.79028
Zfp719	7:43589847-43591086:+	4.06955	5.5501	5.21731	6.99778	8.27596	0.769238	6.52711	5.24817	10.9821	0	7.90054	10.9517	5.6128	4.56362	3.4986	3.1655	8.22198	6.69837	9.16383	9.59885	7.27949	7.4769	1.85277	10.514	3.81305	8.28711	9.69611	9.30634	3.33765	5.62145	10.3004	9.90388	7.53322	3.91734	5.33751	4.30424	1.98206	6.77072	2.12591	4.17488	6.19329
Zfp72	13:74371742-74372807:-	2.01378	1.4274	1.71998	1.43652	4.49393	0.123414	9.19486	2.01741	5.84746	0.120471	3.38393	4.37439	1.84503	0.344204	0.308194	0.411077	7.43629	3.80463	4.72974	4.5134	3.62438	5.17617	0.271461	4.111	1.81774	4.30306	1.83459	6.18111	1.58634	1.93419	5.1001	4.56631	7.85855	0.674033	2.04115	2.17151	0.9466	3.58774	2.97621	1.39705	1.89658
Zfp729a	13:67618406-67621832:-	1.23304	2.97384	2.68295	2.8232	9.15255	0.438696	14.5363	2.6624	3.23032	0.21056	9.39704	4.34025	2.41672	13.3739	8.69552	1.03388	13.0547	2.18734	17.0124	2.98383	2.78293	2.6327	1.01617	3.2175	3.02168	2.69026	16.3269	11.253	6.32249	4.63378	3.29169	2.9095	8.57323	4.13903	1.57714	6.92051	1.96891	2.10977	0.462569	3.30122	2.90908
Zfp729b	13:67590428-67593745:-	1.71056	2.15646	2.34475	2.57573	10.8169	0.225801	21.0347	2.40625	3.41258	0.10528	22.9417	5.03088	2.40936	14.9627	11.3495	0.844738	14.111	2.36836	20.1089	3.20122	2.98771	2.74099	0.697646	3.3035	3.29227	2.71465	19.2453	15.6692	8.44361	9.13918	3.61443	3.29633	10.212	3.54052	2.03973	8.20154	1.72302	2.22767	0.41167	2.96089	2.99884
Zfp735	11:73711683-73712919:+	0	0	0	0	0	0	0	0	0.00073447	0	0	0.00609149	0	0.0408903	0	0	0	0	0	0	0	0	0	0	0	0	0	0	0	0	0	0	1.29533	0	0	0	0	0.00141878	2.43202	0	0
Zfp738	13:67667906-67671510:-	4.05435	6.62094	5.92215	5.06899	11.0232	0.886886	21.0998	5.81837	8.19753	0	11.5941	10.0927	5.82409	12.3501	8.91937	2.75048	20.4294	5.49534	22.6343	8.04329	6.29496	6.076	1.66307	8.12506	4.41927	5.83243	21.5404	16.5938	10.2125	2.37092	9.24	8.49308	9.59039	6.11774	4.51222	6.10552	3.11714	5.57037	1.30199	4.78797	5.54024
Zfp74	7:29934250-29935741:-	13.9378	8.09063	9.85103	10.1563	4.2457	3.65311	7.78337	8.49044	7.94214	5.52119	15.2988	9.47268	8.2259	15.1743	25.6263	3.89101	8.97075	6.64773	8.89737	9.39273	5.23925	5.61026	1.35226	8.67935	3.49815	6.68311	5.58862	12.2015	11.8714	5.37294	10.7574	9.43	8.21987	4.98399	5.6727	1.88606	4.23392	6.53574	0.715041	6.43841	5.71511
Zfp746	6:48064005-48064425:-	17.4031	23.6124	19.4857	17.4854	15.0559	25.9976	16.0132	14.087	15.3374	8.30721	7.49379	14.0964	15.701	16.5683	39.4636	12.4075	13.6772	8.39217	16.8898	12.5118	9.08785	12.3876	16.4586	17.7259	9.53411	14.8386	17.8474	17.5087	26.0975	14.37	13.3088	12.7837	23.8971	12.0719	7.60552	14.9192	22.4153	9.88604	12.6845	26.5944	12.089
Zfp747	7:127373799-127374537:-	5.29792	5.07542	4.61107	5.34291	8.20717	14.9878	4.24074	3.43112	6.10248	0.346222	6.32293	5.00085	3.11321	6.68527	4.624	8.09079	3.06351	4.61137	5.13884	5.31019	9.43924	6.41013	33.1543	6.36616	4.58015	7.6038	6.15587	4.54462	4.88623	6.67759	5.50183	5.25317	6.88905	4.05881	5.07561	30.866	8.30264	6.79363	1.29997	9.87758	6.43236
Zfp748	13:67540257-67542893:-	4.53039	6.35128	6.99758	5.03747	13.7677	2.83723	11.923	3.74638	12.5076	0.331031	6.46693	13.051	3.58426	11.1937	6.21214	2.313	11.181	7.9365	18.9002	11.2359	9.50936	9.77836	2.25592	12.238	8.05186	10.1323	18.9714	16.0537	7.87408	6.41842	12.9631	11.418	12.1679	7.92442	4.3931	8.42606	4.19199	8.04234	2.57095	10.3921	5.35609
Zfp758	17:22375164-22376235:+	4.81056	1.73207	2.31796	3.11003	4.5545	0.76053	13.6747	2.95573	7.12594	0.225751	6.28538	6.63402	3.24077	12.9914	7.22679	0.829342	9.58488	6.44867	19.1168	6.43521	7.27963	5.52128	0.918406	6.24169	6.67242	6.35666	15.289	12.4355	10.9277	4.84343	7.55405	6.27391	12.8159	3.84766	9.42647	18.6611	4.41466	6.47418	0.990001	7.72103	5.40098
Zfp759	13:67138707-67141044:+	0.99622	2.22707	2.05817	2.01342	4.45199	0.19842	5.63459	2.34263	1.81871	0	3.6687	2.73757	2.17126	7.56277	4.01217	0.672856	4.53695	1.44029	5.78365	2.56613	1.3343	1.45095	0.293682	1.69031	1.37104	1.26297	3.075	4.78191	2.6504	2.33721	2.73694	2.53692	4.58905	0.976035	1.3162	2.84679	0.446923	1.1835	3.77288	0.880511	1.31634
Zfp760	17:21722391-21723795:+	2.88833	10.1302	11.7709	6.75837	2.68601	0.376989	10.0372	4.058	12.8798	0.782533	8.41384	13.4397	4.66494	11.4751	7.13043	1.72659	5.54639	6.03228	10.5249	9.34841	6.1857	8.48383	1.34107	12.5776	7.48222	8.16981	6.15975	6.54134	5.41019	3.40613	11.1572	9.30381	7.01222	4.03137	3.80567	6.07494	3.42678	5.81902	0.419134	1.90794	5.02027
Zfp763	17:33018426-33019497:-	4.94041	9.85878	9.62089	7.83223	4.83097	0.185121	10.6714	6.91612	13.8225	0	4.07231	18.0924	7.14018	8.00158	4.13117	1.4707	5.84288	5.67733	11.3361	15.2683	8.15956	8.58806	0.831558	11.3062	4.11321	8.68284	3.95097	7.02332	6.69625	2.56237	17.633	16.8514	6.67518	2.39601	4.63109	2.41416	2.81687	6.20959	1.68651	4.37201	4.00214
Zfp764	7:127404760-127405498:-	4.42546	3.58793	3.45085	2.84624	9.27761	9.67372	9.15566	2.57468	5.77383	0.5264	3.22107	3.88061	2.26172	2.76017	1.51578	5.40571	10.0564	5.07462	10.1141	3.47259	7.17372	6.19229	10.4942	6.25558	3.2963	7.64552	10.1045	9.89727	3.50388	3.54928	3.99402	3.78578	5.84633	2.98395	4.39921	8.18558	6.74641	6.15985	0.382873	8.09431	6.99555
Zfp772	7:7203457-7204108:-	2.03576	6.90394	7.39519	8.22042	3.42724	1.0518	3.65827	11.8711	7.12454	0	2.55416	6.83724	11.5629	1.52758	1.60497	2.07063	3.90191	4.10793	2.86012	6.12357	4.53988	4.95452	1.48418	7.85752	2.57762	4.94135	2.31647	4.20426	1.49514	2.10222	6.49545	6.27259	2.69207	4.63665	2.62139	1.83357	1.83166	5.49966	1.23335	2.52099	7.40483
Zfp773	7:7132218-7132869:-	0.316305	4.15947	3.51649	0.794854	1.42813	0.0619031	2.00023	0.55336	2.13556	0	1.27093	7.79906	0.839085	0.677844	0.520502	0.133621	1.41653	0.786116	3.76935	6.56054	1.0493	1.07601	0.250063	2.04266	0.326489	1.01275	0.543318	2.35062	0.883981	0	8.8937	7.36417	0.443101	0.24431	0.197206	0.252945	0.215993	1.02174	0.0360674	1.47375	0.33675
Zfp777	6:48024640-48025480:-	15.5264	13.5728	12.9918	21.4438	12.5508	29.1906	23.2392	12.9286	6.67011	21.251	14.639	9.82462	15.6862	58.0197	93.1416	16.5204	25.006	4.9051	18.4838	10.1152	5.38898	9.63821	18.0911	9.1662	6.8885	8.89562	7.28194	15.5306	43.3017	22.6813	10.2552	8.62481	21.7429	11.8174	4.14316	19.2995	18.4839	8.43868	5.16618	24.3321	7.25627
Zfp78	7:6378570-6379473:+	1.09732	1.5445	1.90901	2.22171	0	0.186102	4.91062	1.34665	1.61836	0.21056	1.0141	2.51742	1.56551	1.92216	3.21755	0.502125	0.702188	1.0626	2.88182	2.31172	1.44136	1.33316	0.225611	1.49613	1.30166	1.73622	3.45749	3.20878	1.18923	0.796361	2.6239	2.35824	1.29605	1.96558	1.19925	0.560561	0.694544	1.26245	2.80315	0.748041	2.23431
Zfp780b	7:27962616-27964612:-	1.10358	1.95662	2.33448	2.06925	5.63055	0.192261	7.24088	1.99692	2.83095	0	6.24155	4.09493	1.73617	9.29696	5.25212	0.936791	8.40216	1.72545	5.28514	2.9992	1.88993	1.95051	0.708757	2.63269	1.96732	2.11894	6.16917	6.09557	3.64643	8.05293	3.73893	2.68228	2.52267	2.86158	1.46233	1.43815	1.09816	1.89929	1.1493	1.5913	2.17639
Zfp786	6:47819755-47821279:-	0.700427	4.66755	3.90801	1.79125	0.602865	0.480553	2.14212	1.36184	3.05039	0	1.4399	8.02179	1.48475	1.76451	0.721127	0.394677	4.13464	0.900051	0.716833	6.68098	1.52162	1.48083	0.369225	2.70645	0.619034	1.68787	0.0160608	1.35038	0.736403	1.48257	8.26002	6.72419	1.74778	0.218353	0.869419	0.272966	0.509346	1.27161	1.14202	1.00379	0.499157
Zfp788	7:41648658-41650569:+	6.72369	12.4433	14.159	14.1138	9.09518	0.356747	8.39015	11.9698	10.187	0	9.43441	17.1138	13.5307	9.92507	5.74562	1.97139	14.1242	5.87962	12.2603	13.9879	6.82986	7.85756	0.75844	9.88546	4.36142	6.91692	7.82523	9.09461	7.50022	7.1612	15.8752	16.0621	9.74027	4.48192	5.30711	8.81377	3.14778	6.22252	2.53623	4.52269	9.31104
Zfp790	7:29827431-29830128:+	3.37215	7.52126	8.18349	6.24806	6.34677	1.37799	7.51331	5.11512	10.4549	0.541591	3.42121	12.992	5.07425	6.10676	18.8483	2.98094	6.67632	8.08577	10.0854	12.4696	7.15043	6.71077	2.99097	9.66707	5.4606	7.77626	5.84627	5.48568	4.50253	5.30915	13.8575	14.1726	4.19316	5.08481	7.56437	3.22292	3.43792	6.51419	0.708251	5.76187	6.26957
Zfp791	8:85109652-85110924:-	1.01724	1.72346	2.03741	3.23502	1.23942	1.00245	0	2.76364	1.85291	0.240942	0.707329	1.81268	2.34683	0	0.00446033	2.62079	0	1.2106	0	2.06939	2.14127	1.59518	1.95543	1.81978	3.99009	1.91881	0	0	0	0	2.16334	1.86494	1.14876	2.14734	0.853149	1.03311	0.339356	1.81582	0.317721	0.351041	3.13312
Zfp799	17:32819385-32820702:-	2.56419	10.1138	7.96028	6.37084	4.13748	1.24607	4.56137	7.18081	8.36797	0	4.6015	8.59999	7.09688	6.00997	3.00404	1.98174	4.40762	4.83418	5.72244	7.28076	5.08089	5.82132	1.76675	8.36296	2.10666	4.81982	2.16837	4.55269	1.20107	0	8.04757	7.30947	4.84385	1.58527	3.03709	3.71967	1.48937	4.44054	0.281461	3.18128	3.79684
Zfp808	13:62171360-62173355:+	3.00973	1.08139	1.96911	0.370099	9.14471	0.0960322	8.29725	0.601839	6.09892	1.08318	25.6224	3.67112	0.543459	6.56137	2.94324	0.158361	11.2864	5.30077	6.82886	2.85476	4.08453	5.20011	0.208241	6.29976	9.17613	4.97919	6.57782	11.2613	14.4916	4.34172	3.23	3.1053	4.26116	2.65107	2.55225	2.57407	6.17531	3.78897	0.318299	2.97751	3.00597
Zfp809	9:22238676-22239249:+	8.93089	2.28585	3.38276	6.00271	9.46921	8.2576	19.0353	5.581	5.78834	0.933385	52.8488	4.40448	4.42178	49.3561	31.9992	8.49614	19.9792	10.8334	18.7968	3.61756	10.3202	7.6686	4.9564	5.79414	9.1098	9.98972	23.2518	22.588	17.8803	67.7996	4.11076	4.20677	12.9594	12.6458	4.60072	16.0112	8.85206	10.2375	5.85896	9.706	19.6206
Zfp81	17:33334266-33335169:-	2.29675	11.4693	9.26269	4.58861	6.47941	0.232549	10.1176	5.69948	5.87211	0.240942	3.51212	11.2789	6.6883	8.29434	3.35756	0.81151	7.21221	3.46557	11.5946	7.33187	3.82836	4.26023	0.766735	5.51166	3.06853	4.02216	6.14447	8.47439	7.53801	5.65535	8.80316	6.95526	7.66328	2.70259	2.837	3.52407	1.81201	3.29609	1.39556	3.18526	3.01671
Zfp810	9:22278242-22279061:-	4.3793	18.2447	17.301	7.20552	5.95396	1.97286	12.193	9.32663	11.8664	0.21056	5.51589	14.5562	10.0126	5.47823	3.60757	6.50058	7.92243	8.74584	8.83771	12.3744	7.73455	10.3053	3.64538	12.5331	4.6118	9.66122	6.86691	7.60059	2.58569	0	14.1694	12.2456	6.62956	5.51936	3.7142	5.25575	3.53371	6.93213	1.91495	8.19452	7.58493
Zfp811	17:32797408-32798482:-	1.68341	23.0209	20.5274	4.67171	3.89054	0.177589	0	4.85831	6.2521	0	1.77488	22.7452	7.1642	0.108707	0.00147388	0.262208	0	1.16715	0	30.1188	3.23394	1.55411	0.180974	3.35472	0.333937	1.37256	0	0	0	0	36.9052	31.2307	0.550246	0.642513	1.32193	0.584295	0.266355	2.5088	0.0720384	0.0848014	6.67766
Zfp819	7:43616997-43617900:+	0	0.372586	0.324374	0.0559036	0.0170112	0.0271856	0.0368454	0.119526	0.310172	0.240942	12.9846	0.425086	0.086963	0.0067527	0.00249387	0.115641	0.613541	0.0318814	0	0.392861	0.0271216	0.0803704	0.169668	0.294299	0.0455713	0.234608	0	1.39902	0.0150544	0.36095	0.372691	0.239579	0.161462	0.0550054	0.033962	0.0996053	0.0607285	0.0431673	12.6192	0.0610155	0.0267595
Zfp820	17:21817881-21819793:-	2.87903	0.846378	1.49062	0.251012	0	0.0827336	8.08911	0.309086	5.34549	0.31584	5.84692	2.75268	0.524713	0.00964813	0	0.203383	3.69632	4.00622	8.7042	2.09929	5.4032	3.56314	0.226824	5.2191	2.66626	4.68276	0.909928	5.10488	3.40797	0	2.37991	2.08059	4.25985	2.65917	3.98903	12.3481	1.5909	4.20798	0.0940452	3.26526	2.47492
Zfp825	13:74480379-74481110:-	10.81	3.79934	4.74006	4.1722	16.9938	0.426182	10.9383	4.43706	19.0594	0.361412	7.85051	13.8119	4.24462	9.83854	6.46221	0.959804	8.9462	15.982	8.12165	12.7947	14.5911	17.6974	1.01719	19.0311	15.3712	16.4389	21.9086	14.49	7.43502	6.932	13.801	14.1504	12.0327	5.83004	19.3751	22.8476	11.6904	13.2468	0.470419	9.55801	11.4632
Zfp84	7:29776634-29777537:+	3.13226	11.1854	10.1277	8.00597	11.0446	3.5792	19.8424	6.56005	10.467	1.4294	5.53107	12.4265	6.87756	12.8098	9.47025	4.74378	15.3122	8.58365	19.0267	10.052	7.89537	9.22798	5.56278	10.2357	7.20596	8.80323	13.5774	14.0771	12.4106	8.59767	11.2593	10.2324	5.19752	6.26823	9.96701	4.66731	5.96741	7.23567	1.43008	10.4264	7.58265
Zfp846	9:20593187-20594411:+	3.10261	14.016	13.7078	9.1261	3.90473	1.01352	6.00578	7.02391	8.63195	1.02347	6.41384	16.4026	7.90168	7.16649	4.95728	2.64208	5.50639	5.39092	4.52293	14.5304	5.88098	5.5715	1.90915	8.35744	3.23244	6.62287	10.3057	7.74915	5.09851	9.20311	16.36	14.0297	5.42111	4.7927	4.28105	5.62906	2.01848	5.40407	2.30499	7.28667	4.9159
Zfp85	13:67748550-67749705:-	3.63507	2.81965	3.52611	2.49909	4.44939	0.145029	4.70719	2.42832	4.45858	0	1.68406	5.35678	2.30353	5.72354	2.21329	0.68465	6.41367	2.78116	7.82254	4.08897	3.10216	3.75077	0.610603	4.25233	2.33995	4.00791	7.49352	7.64446	5.15384	2.21804	4.99194	4.44925	5.67844	2.37045	3.17377	6.23154	1.46764	2.57734	0.405266	4.23564	2.77812
Zfp850	7:27987707-27990262:-	0.769597	2.72329	2.82543	1.67091	16.8337	0.157151	14.4535	1.44683	4.25255	0.225751	21.1154	5.53356	1.52235	8.50667	5.7888	0.250561	5.97862	2.16509	9.34237	4.07602	2.7368	2.92087	0.504154	3.96194	2.7998	2.69284	3.13203	7.19025	8.4997	6.32345	4.89839	4.10345	2.28579	1.63733	0.886986	1.2637	1.44569	2.039	2.62084	2.50716	1.07738
Zfp866	8:69765492-69766479:-	7.00896	27.127	27.2714	21.1906	17.402	7.07936	22.8766	14.1821	25.5068	1.8961	17.3728	30.0999	15.5241	20.7762	12.2528	9.27028	23.4879	16.9508	20.7039	25.5811	15.2615	18.6803	10.4603	26.2357	15.4488	19.0885	26.0655	18.652	18.5255	18.592	29.4151	26.3203	17.3804	13.7182	10.7662	12.2743	15.3015	15.611	9.16853	21.7729	15.4156
Zfp867	11:59462795-59464135:-	4.3289	5.01115	5.36515	3.2099	6.34166	0.211522	2.27265	2.3448	7.12414	0	4.61057	9.66031	2.40723	2.39673	1.5865	0.913202	2.49935	5.94506	5.1288	7.58382	4.14937	5.45462	0.687554	6.78156	2.6778	5.71724	0.989456	1.88991	1.59544	0.216203	8.77213	7.45351	2.15893	1.7577	7.70101	1.00855	1.52715	4.22183	1.60479	1.90247	5.45315
Zfp868	8:69611482-69612214:-	11.1919	16.2309	16.6891	12.4866	12.763	3.26666	17.3953	9.43632	20.2869	3.34069	14.4914	28.1956	9.62611	26.2555	16.0365	5.38412	14.6988	13.7898	18.9292	24.2255	14.2038	15.9791	7.34922	20.1519	11.7734	15.7153	21.6212	21.4263	20.9392	12.5662	27.4109	25.2101	13.883	14.5522	11.0456	15.0301	9.77695	13.0507	5.85217	14.8429	10.4137
Zfp869	8:69706391-69707378:-	8.24089	10.0011	14.147	16.6735	25.9613	1.30907	27.9346	13.5703	22.859	2.64825	5.25224	23.0759	13.8294	21.8598	13.2125	6.35752	17.9241	17.7456	33.2358	17.6716	18.9695	18.6453	4.97575	22.9444	18.431	18.2569	19.3565	23.6469	17.4855	16.8949	19.1885	18.5702	11.8991	21.0181	10.566	14.1441	10.4007	15.4463	1.74053	13.918	17.823
Zfp87	13:67516691-67518011:-	29.9031	17.6846	16.0605	19.4047	18.4997	14.2172	14.1756	19.9463	18.8107	3.73037	11.6345	25.6963	20.2499	21.2146	11.5873	35.8861	18.9795	19.4071	21.894	22.8034	20.0233	24.0708	23.8562	18.6415	17.9979	22.5648	31.0209	21.5888	10.5834	28.9381	24.748	24.4339	19.7165	10.6313	16.3955	18.5276	20.372	18.6981	92.0011	41.3538	26.5821
Zfp870	17:32882700-32883762:-	2.0201	3.16069	3.37968	3.63467	4.1704	0.677992	2.36594	3.38815	4.57444	0.120471	6.52954	4.73513	3.31839	1.86459	1.62924	1.2633	2.13522	4.08755	3.61229	4.02894	3.8172	3.47929	1.3951	4.60186	2.39671	3.89553	2.85848	2.71985	2.6788	0	4.64687	4.39876	2.22988	2.11999	4.05944	3.03222	1.54454	2.70307	0.324896	0.773051	3.16514
Zfp871	17:32774378-32775617:-	7.98285	10.9147	9.05337	9.37743	12.6303	2.33845	29.1932	7.91893	27.841	0.451502	22.6087	33.5807	6.95458	46.2725	23.7524	6.42921	27.3203	21.241	30.9731	29.223	25.1674	26.1031	4.48049	29.1257	20.2145	23.7953	39.4105	29.2135	23.8601	23.9843	33.2683	27.8204	15.4798	7.27175	19.6759	9.1812	14.8852	19.5787	1.46013	20.7493	14.5282
Zfp873	10:82059643-82061299:+	3.82808	4.21602	4.82018	2.40105	5.61996	0.288489	5.07642	2.53639	7.41549	0.120471	5.92839	7.96702	2.96078	5.50377	2.96314	0.907592	7.97226	6.95497	7.43847	5.87545	7.05518	6.71547	1.30563	7.40569	3.30847	6.19313	6.34016	5.9385	6.23534	3.25986	7.15698	5.78267	4.45264	3.88758	4.62498	3.52221	1.68765	5.97996	0.202922	4.90147	4.23392
Zfp874a	13:67442065-67443149:-	5.74825	1.93712	2.56539	5.21938	12.116	0.253183	9.09843	5.79452	6.87413	0.646871	4.62351	4.92593	5.30585	5.98586	4.87015	1.57872	6.6722	4.76106	13.73	3.91285	5.34428	5.72367	0.556458	6.55952	10.3604	6.30601	6.22405	8.51271	6.54036	1.68742	3.95247	3.882	11.8471	3.97513	4.98326	7.1687	3.86381	5.11567	0.629038	3.75957	5.37612
Zfp874b	13:67473532-67474766:-	2.02457	1.82676	2.44689	5.76345	4.86178	0.34286	7.11114	5.82685	2.17328	2.22713	3.72197	2.35225	4.60394	12.2379	12.4069	0.994464	4.09911	2.39077	8.53725	1.74625	1.82859	2.12543	0.919229	2.25504	4.90383	2.34241	7.3026	5.14309	5.10772	3.88298	1.74982	1.62336	7.6424	2.88784	2.82073	4.1065	2.96535	1.88249	0.404687	3.36076	3.49693
Zfp879	11:50832541-50833612:-	0.595055	0.894302	1.25787	1.10116	0	0.239296	0.925443	1.15022	0.616976	0	0.385015	1.41919	1.31283	0.0067527	0.00447582	0.458254	0.168415	0.512125	1.27732	0.907913	0.385296	0.594595	0.110282	0.716514	0.265704	0.412757	0.00669612	0.0551295	0.0542686	0	1.19064	0.882733	0.537605	0.132631	1.04161	0.121687	0.0918868	0.384237	0.758283	0.357043	0.619319
Zfp882	8:71913585-71914989:+	1.40574	7.9328	8.14683	5.82391	4.68424	0.245063	7.23226	3.18815	5.70105	0.331031	5.95049	10.7779	3.68798	4.39799	2.96628	0.752967	3.96759	2.52968	9.51249	8.77266	3.06005	4.09974	0.355689	5.46182	1.83147	3.56776	3.9519	5.04731	3.58054	16.0089	10.7193	8.75043	4.80688	1.40965	2.56112	1.46681	1.52708	2.80954	0.339342	3.20304	1.94953
Zfp9	6:118464361-118465345:-	3.17565	11.6488	11.5934	8.8492	0.0958591	1.15815	0.0921135	10.398	10.6132	0	0.44125	7.29304	9.68435	0.0827763	0.0807783	2.9194	0	6.61596	0.111674	8.15841	5.23265	3.68695	1.55972	13.1852	3.11567	5.62865	0.0790842	0.253839	0.249513	1.31638	8.44457	7.58096	5.19371	10.6684	7.64927	1.31105	1.08284	5.5586	0.484383	0.472417	9.06503
Zfp90	8:106424283-106425540:+	6.52646	21.9639	22.7102	7.96402	2.60942	1.79194	10.5146	7.15471	19.3761	0.346222	4.49487	29.1511	8.15433	0.0487654	0.0114724	2.85697	5.9875	11.5926	10.7726	22.7569	11.2928	10.6105	2.12346	18.1565	4.44185	10.138	8.00999	6.48727	5.3147	3.6079	25.8854	22.454	4.2052	8.49753	9.06441	1.8084	5.34617	10.2098	1.42998	6.94995	9.50344
Zfp92	X:73421828-73422698:+	0.132191	0.891713	0.996089	0.399565	0.029647	0.192064	0	0.667353	0.160736	0	0.0406934	0.558641	0.851838	0.0229524	0.00807991	0.0949308	0	0.012408	0.402732	0.809301	0.352855	0.0298132	1.07876	0.199767	0.0134648	0.107553	0	0.0204253	0.0139112	0	0.94157	0.498941	0.294593	0.350984	0	1.67174	0.0140938	0.12618	0.209229	0.0238831	0.0299489
Zfp93	7:24275449-24276604:+	3.21991	5.4204	5.59487	6.28976	0.259004	2.64614	2.5341	7.1248	7.61394	0	4.05677	6.92307	6.13849	2.0408	3.65957	3.26216	2.19038	5.94558	5.54524	5.14768	5.44371	7.81807	2.29766	7.79822	4.01489	6.36898	0.0683813	1.14011	0.756458	0.0100753	5.43768	5.25496	2.39034	2.81971	5.35901	2.12057	1.58402	5.49534	5.80382	3.27728	5.79255
Zfp930	8:69227606-69229633:+	5.17307	5.19185	7.43269	7.7722	29.0059	0.289273	24.479	6.87157	12.4898	0.466692	24.9215	11.4648	6.43507	29.0108	16.4063	1.10767	19.1742	14.2907	14.2885	8.51919	10.8007	11.4414	1.12422	10.979	14.9675	10.2757	12.803	22.884	16.9454	19.3723	9.94698	8.60795	14.3834	6.88139	9.82807	15.3026	6.33296	8.8089	0.470033	7.0279	7.77987
Zfp931	2:178067381-178068360:-	16.5999	5.07153	6.92588	12.5359	10.8733	0.45376	20.4382	11.0361	13.878	0.752151	16.6431	10.9411	10.7117	1.87332	0.885571	2.71733	12.238	12.3754	19.2938	10.4331	13.2337	12.0314	1.14504	11.4349	8.25639	12.1933	15.0268	14.302	12.757	0.0617813	10.5511	10.3458	16.0783	7.14783	10.3321	7.27735	2.62081	11.2422	0.311221	5.56506	13.2921
Zfp932	5:110008752-110010076:+	13.9326	18.588	24.6363	26.1017	31.6578	1.12638	70.0664	32.1741	17.7402	1.68554	22.2543	19.2675	35.0693	31.9157	17.8258	8.76881	54.7267	11.6905	60.7759	14.1845	15.5716	16.0679	3.18649	18.2335	11.8995	13.1818	28.3966	60.9999	40.978	21.2161	15.3533	17.6869	17.3801	12.7395	14.99	19.6543	12.5328	16.0327	7.70588	17.9362	26.3883
Zfp933	4:147825754-147826909:-	7.17741	5.45356	6.00125	7.70012	4.5914	0.417474	6.85283	6.95827	4.29558	0.10528	3.65271	5.98323	7.29602	7.03417	5.6331	1.63208	12.7579	4.75418	10.6956	4.23199	3.79891	3.35462	1.26968	4.2127	3.03891	3.57027	6.37732	7.86833	4.3062	4.75242	4.89255	4.1029	6.07193	4.94081	4.48102	4.35819	2.1203	3.40447	2.53079	3.03379	4.68604
Zfp934	13:62517364-62518519:-	3.00486	1.4814	2.51061	1.25207	3.87271	0.0347175	4.44614	1.68126	7.38319	0	3.42112	4.68215	1.30071	0.824704	0.426509	0.0937794	7.35283	6.39394	4.37585	3.93465	4.80029	5.41676	0.220565	7.68277	3.136	5.28439	2.7357	8.53517	7.42533	2.83222	4.46004	4.39374	4.15892	4.32228	2.90471	3.00159	1.30274	3.52273	0.202826	2.19615	2.69427
Zfp935	13:62453834-62454982:-	5.65937	3.33737	4.76409	3.08583	8.38334	0.239296	7.92409	3.08317	11.4692	0	7.71199	10.0176	3.00198	16.4901	9.38206	0.636897	11.1519	8.92572	6.62084	10.0542	8.03826	8.65408	0.320949	11.3687	4.75108	8.77304	16.2998	15.2771	6.85249	4.38093	11.1196	11.2442	14.3833	7.67662	9.22328	13.5243	3.42153	8.12715	0.773886	4.30252	8.7217
Zfp936	7:43189560-43191466:+	0	0	0	0	0.0777542	0	0	0	0.00726536	0	62.8985	0	0	0.00964813	0	0	0	0	0	0.00186735	0	0	0	0.00807077	0.00318848	0	0	0	0	0	0	0	0.699257	1.88891	0	0	0	0	0.795314	0	0
Zfp937	2:150238282-150239521:+	3.84442	2.02419	2.34613	1.67341	5.74132	0.247024	4.19488	1.68315	6.77886	0	6.23858	6.85947	1.82029	0.0565929	0.021443	0.920819	3.1021	3.78963	3.41277	7.12475	6.48268	8.11365	0.406585	7.05398	1.97357	6.17846	2.42435	2.35323	0.852009	0.0529289	6.95623	8.15369	6.59437	2.79418	3.49704	10.5508	1.15827	5.00619	0.281364	1.41458	4.01692
Zfp938	10:82225077-82226298:-	9.54054	10.6983	12.567	15.0965	13.6203	0.584902	5.74041	15.948	12.4013	0	6.33236	15.8845	16.1139	8.92921	5.44556	2.38778	6.00397	11.7163	5.29595	15.8755	11.0806	10.8079	1.31169	11.8481	4.74611	8.97012	3.42425	6.45842	2.10565	0	17.3933	18.0587	5.56733	5.91564	12.3455	6.06945	2.55857	8.8755	1.66276	5.62112	9.38547
Zfp94	7:24302620-24303523:-	5.96572	16.7362	16.2415	12.4552	6.87868	5.4563	3.67081	14.8512	10.0784	0.843296	5.77865	14.3617	14.0887	6.65897	6.55883	6.85182	4.30921	5.05714	4.46017	11.8262	5.97288	9.09281	3.71607	10.5888	4.62178	7.30222	1.09343	3.13568	3.402	6.57936	13.4262	12.8804	6.36001	3.14489	6.588	2.18934	9.44014	7.25792	13.4641	5.55522	7.3933
Zfp940	7:29844789-29845724:-	0.94936	5.91623	7.30907	7.31509	16.2958	0.123414	5.74238	10.7195	5.31048	0.120471	8.1173	9.94228	7.8411	4.42743	4.99593	0.272851	4.82147	2.0299	5.02504	8.01341	3.03611	3.63311	0.41527	5.46909	1.58581	3.21228	1.4278	3.54005	4.39471	10.4195	9.60198	8.32379	1.34175	1.00477	0.97118	0.486543	1.23426	2.64469	1.10052	2.72086	0.991774
Zfp941	7:140811290-140812424:-	2.8159	7.89758	7.10397	10.651	0.263945	0.20399	1.83404	15.0837	1.86854	0	13.291	8.67357	14.3748	0.0408903	0.100471	0.321327	1.14613	0.769028	2.12385	14.7257	1.46719	1.14685	0.253896	1.54304	0.682104	0.393324	0.150302	1.05635	1.46252	0.0273106	16.4824	15.3902	0.277931	0.247957	0.162282	0.162023	0.223012	1.10283	2.30957	0.346847	0.787647
Zfp942	17:21927688-21929094:-	6.90162	6.03598	7.9582	5.8103	8.24018	1.67272	25.8332	6.46715	18.1311	0.646871	10.8211	17.203	7.59775	39.7179	20.3922	2.36722	16.4564	11.9982	21.9359	13.54	18.4572	13.6012	2.11089	17.105	14.4161	11.9071	23.1253	23.7291	14.3497	9.51582	14.5792	14.4617	18.1807	10.437	10.6462	36.815	8.74961	13.0559	2.93615	13.8673	9.02356
Zfp943	17:21992477-21993632:+	6.44719	9.35271	9.60352	10.0826	7.81924	3.76089	21.5968	12.6162	14.7517	1.4294	2.95795	14.9102	11.8612	12.6951	7.53546	4.33229	11.0501	14.3341	26.9317	12.188	13.7298	11.1109	4.40296	13.9857	11.1013	11.1285	27.7878	18.9723	11.5736	3.26107	14.1379	13.4011	15.0819	8.34589	14.5937	32.6142	9.78239	11.6526	6.0139	13.4021	14.286
Zfp944	17:22338648-22339712:-	7.5438	5.65131	7.14482	5.59737	5.96861	4.2721	11.172	5.30573	11.5229	1.26442	6.46702	12.3595	5.89216	14.9546	9.60443	2.17218	12.5477	8.0601	10.8324	8.75962	10.545	8.91632	3.33855	11.0834	9.75127	8.15941	19.8891	15.4748	12.2214	5.68218	9.89889	8.91712	9.77767	5.75891	9.13457	20.4922	7.8864	8.28319	3.67719	11.0392	7.57808
Zfp945	17:22850631-22852290:-	51.5586	11.4673	14.7387	4.89438	15.3261	1.89628	17.7406	13.2498	34.67	0.692443	18.8195	27.8795	10.0188	21.3763	11.198	7.97624	16.757	41.4671	23.3199	21.8809	30.2212	31.7456	3.43287	35.3968	12.937	39.0259	17.1697	15.9481	8.3914	2.52807	23.5131	23.3864	15.9732	9.71182	47.3319	13.6194	18.4108	28.1517	2.0049	20.2283	38.3983
Zfp946	17:22454827-22455814:+	5.76854	16.0872	17.6817	12.3025	4.76959	6.05776	5.60597	6.80082	13.4913	6.84848	4.42921	22.3925	8.61674	12.4258	11.497	2.63605	7.78039	7.86957	8.13947	20.8313	13.3434	9.58998	6.75376	13.9605	6.69326	9.13177	11.6917	6.91225	4.08512	0.0172353	22.5465	23.2645	11.7534	4.9897	6.37302	45.2857	2.27629	9.79442	1.00184	3.08111	5.81964
Zfp947	17:22145322-22146139:-	1.85325	0.643318	0.819129	0.436268	3.7572	0.136516	5.20185	0.14754	2.02262	0	1.7217	1.53276	0.32132	2.72271	1.11779	0.34434	3.7354	2.49817	3.4703	1.30515	2.77613	2.03215	0.214306	1.69932	0.961513	1.79637	5.0952	4.42107	1.45272	0	1.67924	1.20672	2.12018	1.63008	1.6513	2.61952	0.748078	2.12226	0.072424	1.10867	1.55934
Zfp948	17:21587192-21588512:+	7.8638	9.29616	11.9389	5.98189	1.33829	0.970541	3.37487	7.27057	12.8635	2.60373	6.65459	13.2095	7.4827	11.6306	8.39836	1.62144	2.85803	12.5687	2.10435	11.6692	17.6412	12.2097	2.38905	12.8643	9.20663	12.9386	2.7743	3.57382	1.98686	4.23869	12.6006	12.6931	4.88318	41.8131	10.5877	12.3973	5.11112	12.1247	0.541589	1.30065	10.9461
Zfp949	9:88569185-88570172:+	4.99549	8.97658	9.20591	15.7945	9.67809	2.25754	9.03729	13.1687	8.44548	14.5848	6.95858	9.7895	12.1128	11.0956	8.11132	5.41811	9.08104	7.24794	10.7258	11.2789	6.34467	7.13431	4.46575	8.7543	10.6915	8.14019	5.96907	9.50942	7.11367	7.95797	10.9946	11.6404	5.31229	5.79825	8.05255	5.70955	9.34345	7.32284	18.6362	8.02848	8.66214
Zfp951	5:104813425-104815167:-	3.61047	1.87474	1.66119	1.62743	0.101572	0.0960322	9.23876	1.50891	2.27451	0	14.5753	2.49815	1.5193	0.451422	0.417232	1.06222	7.09265	1.76011	11.4888	2.45492	2.61614	2.39861	0.51808	2.40204	1.89525	2.30207	6.64516	8.0683	4.22041	2.94551	2.31004	2.89026	5.27631	9.03303	1.97548	2.45263	1.26144	1.76131	3.11714	2.94896	3.65357
Zfp952	17:33003304-33004039:+	4.67538	9.71352	9.38411	8.70796	5.47891	1.54628	6.88968	7.61227	10.4572	0.556782	3.53395	13.0155	8.22338	7.15108	4.97063	3.87231	7.89377	7.78334	11.4859	11.8752	7.4846	7.16939	3.74436	10.3608	5.4354	8.43194	7.0101	6.67165	5.08953	5.93608	13.4257	13.11	5.6952	5.06578	6.9345	6.91374	5.37509	6.78844	1.51772	7.94927	7.16498
Zfp953	13:67342638-67343640:-	0.401395	0.48764	0.544029	0.350796	3.68951	0.123022	7.39219	0.36677	0.799157	0.10528	5.56242	0.610946	0.329945	5.28517	4.23143	0.437544	6.46525	0.72817	7.14458	0.4618	0.981759	0.923204	0.59828	0.847784	1.63222	0.821463	14.3259	10.0955	4.97424	0.828253	0.530342	0.55348	3.92097	1.17162	0.522605	4.33966	0.779859	0.797898	0.296485	1.31914	0.979777
Zfp954	7:7115301-7115946:-	7.3852	13.6842	12.1202	10.1375	19.7313	7.99821	11.4993	9.231	9.98737	2.43769	5.78134	16.521	8.76906	9.23984	11.3655	6.07168	13.7111	7.08493	10.3305	12.8683	11.4167	9.10015	17.7206	9.98925	8.79031	9.40672	11.9809	10.2077	7.59929	12.254	13.8507	12.7091	5.18617	13.3428	6.2923	12.2804	8.11612	10.314	1.60373	13.2218	9.59324
Zfp955a	17:33241357-33242460:-	6.14075	5.15218	6.70201	4.50313	11.352	0.280957	14.7095	3.28097	13.3395	0.5264	13.3092	16.9392	3.20412	19.8743	11.3734	1.00122	14.2439	12.4419	15.5248	14.0811	9.77831	10.3708	0.585133	11.9427	7.00401	11.0395	10.9517	12.3318	9.82672	13.2811	15.4792	14.9291	10.5375	4.93105	9.0835	8.27964	3.27272	8.76871	1.63989	10.1322	6.53827
Zfp955b	17:33302254-33303357:+	5.71495	5.15843	7.23719	6.80234	9.36313	0.248789	8.72802	5.79868	19.1573	0	29.2548	23.0452	5.23924	14.4318	8.6253	0.59403	7.71879	16.6314	12.2303	21.064	13.9186	14.9717	0.800652	17.4794	8.32104	15.0939	6.70126	8.61737	6.80442	12.2302	23.0224	23.1812	9.00104	4.81279	15.3093	8.61704	4.80244	12.5297	2.58015	11.411	8.55122
Zfp956	6:47963686-47964169:+	10.3183	21.8669	18.6548	23.7692	11.588	13.4317	7.52349	20.2835	8.48621	11.1042	8.31718	13.1985	21.3323	7.52854	10.8466	13.4473	6.45603	3.02	6.69216	12.5401	8.1677	6.97576	13.6934	11.3244	7.60147	7.04614	1.48427	5.58577	19.5416	12.1783	12.7463	11.6974	17.4354	10.2339	4.69065	9.44295	20.9142	7.22431	82.4968	25.6089	7.98701
Zfp958	8:4627886-4629443:+	13.0047	3.83649	4.93029	5.07667	29.1966	0.253771	14.3183	4.78407	11.534	0.21056	14.6896	12.9256	4.4755	13.746	10.4353	0.870054	14.3342	9.27671	12.9045	10.5298	10.2294	10.4013	0.622731	10.3635	8.55266	9.38464	17.2463	21.3557	10.5975	12.1681	11.6851	12.1941	17.4673	7.13887	10.3361	13.3127	4.8539	8.47872	0.852232	7.34095	8.9184
Zfp959	17:55897828-55898563:+	3.28595	4.0414	5.0236	4.57838	12.114	0.213091	9.97528	3.53332	7.53042	0.556782	3.69663	7.71318	3.65828	8.14417	5.66548	1.00022	8.30655	6.14896	10.3506	6.7125	6.60518	8.14221	0.850963	7.64006	7.94001	7.67648	15.0035	10.9745	6.99132	4.20667	7.70202	8.27454	6.77737	3.99775	5.81767	8.34686	5.73736	6.48123	0.420001	6.03886	7.04085
Zfp960	17:17087502-17089486:+	2.36435	1.1877	1.67165	1.42634	2.72889	0.219642	0.039981	1.86796	4.34599	0.42112	36.1813	3.00951	1.56593	6.91741	3.14435	0.816691	1.22849	3.98561	1.49996	2.49036	3.96416	4.0884	0.438704	4.52877	2.54131	3.5656	0.409687	0.494004	0.00423313	4.55086	2.60577	2.52385	7.92706	2.91241	5.3473	7.42478	0.604383	3.49995	0.853292	0.618321	4.41979
Zfp961	8:71968079-71968973:+	8.80556	18.6212	19.3113	16.4897	17.2931	3.05452	24.8823	11.1988	16.2035	2.07627	62.8834	18.3476	13.6257	34.5861	26.8803	7.14235	30.898	12.8169	28.5662	13.6762	22.5792	19.1429	7.99471	16.1305	18.6061	15.6221	35.0742	35.3019	29.6017	30.8838	14.5203	12.5932	11.4749	20.852	6.85163	23.3783	11.7277	14.5103	5.38089	13.5389	15.6061
Zfp963	8:69742679-69743312:-	2.50375	6.85762	6.79042	4.29117	3.785	2.2005	2.73243	4.40039	5.06562	1.30999	1.99694	5.3594	4.85228	6.81738	3.99227	2.34981	4.12053	3.70444	5.34211	4.60985	5.17827	4.3195	2.80068	5.59899	4.48327	5.21942	7.0571	4.51107	4.56344	1.8438	5.30227	5.38085	3.95478	4.00288	4.91345	5.2551	3.2368	3.55957	0.606646	3.89556	3.35539
Zfp964	8:69663237-69664140:+	0.78826	1.20396	1.27808	0.953141	0.59074	0.375224	0.674582	0.98024	1.669	0	0.569708	1.62899	1.2185	0.0135054	0.00485669	0.917955	0	1.29039	2.60158	1.6497	0.911181	1.189	0.249045	1.68189	0.83405	1.07897	0.690618	0.119948	0	1.19367	1.8125	1.74001	3.26369	5.46781	0.475719	1.0164	0.2093	1.00624	0.289503	0.226051	1.24569
Zfp97	17:17144717-17146701:+	4.38572	1.33047	1.54914	1.0881	13.0092	0.220035	9.53588	1.56019	4.20444	0	38.2295	3.00027	1.55889	12.6581	5.26436	0.733983	11.135	6.37781	7.1303	2.36862	5.46773	5.15939	1.03495	4.00042	4.39702	4.24047	12.7227	12.5717	6.57355	8.29128	3.02756	2.61611	7.91296	5.03757	5.42024	12.0101	2.50698	3.60221	0.506582	3.27784	5.23389
Zik1	7:10489785-10490520:-	1.76544	21.9524	18.3063	4.12997	0	0.204382	6.83088	5.55747	19.5647	0	4.49784	36.4512	5.66598	0.0341376	0	0.528445	2.77141	6.20116	5.4364	23.7817	5.83899	7.07234	0.200769	17.8637	3.71876	6.01006	1.06506	3.45947	2.88773	0	32.874	22.7192	2.01481	1.86725	3.05395	0.256349	1.38863	5.03548	0.87501	3.70133	1.7881
Zim1	7:6676949-6677852:-	1.70027	4.96017	9.10247	1.40446	0	0.0337369	0	0.570856	3.53462	0	0.945291	2.08652	0.76066	0.0202581	0.00399238	0.383458	0	2.87494	0	1.71893	1.85999	1.40891	0.0470628	7.45325	3.84873	0.881623	0	0	0	0.0100753	2.23889	0.953568	0.164473	17.2349	13.2346	0.127999	0.554869	2.05054	0.108491	0.172623	1.61366
Zkscan1	5:138100924-138101407:+	5.96138	14.2991	13.2891	11.7074	12.2597	4.72072	30.1869	10.2265	18.9264	0.451502	8.90225	23.1069	10.5773	27.2742	18.7523	6.96325	21.1158	11.0157	34.99	19.0536	12.425	15.6236	5.83636	17.6519	11.2486	11.9377	16.3012	24.6837	27.7032	16.0007	22.183	19.8143	13.2507	8.12989	6.80114	8.19686	4.882	10.5063	4.70432	6.76173	9.0884
Zkscan14	5:145195171-145195735:-	6.04488	4.21354	4.25922	6.5526	12.7046	2.76556	12.8033	5.95226	6.76671	38.4473	4.17247	8.4877	4.8247	8.86584	8.99409	3.79103	6.26975	6.42895	16.1977	7.62505	7.55234	6.65351	6.44247	6.11003	8.94022	7.28362	11.3919	9.76113	10.0842	8.23097	8.1718	8.41848	2.06499	5.22672	9.84254	4.41777	8.22578	6.29351	3.87809	10.8733	6.20873
Zkscan16	4:58957171-58957822:+	0.205048	1.86598	2.75252	5.85118	0	0.00674737	0	11.1231	0.801483	0	0.641663	1.08839	8.57437	0.0412644	0.00160394	0.550307	0	0.206917	0	1.32994	0.322603	0.449426	0.0197954	0.939332	0.132763	0.182889	0	0	0	0.0100753	1.51579	1.07353	0.432861	0.118663	0.079886	0.045906	0.129957	0.370596	0.621092	0.032131	0.0467259
Zkscan17	11:59487104-59487605:-	13.4283	10.4291	12.1673	8.70552	33.5908	10.5815	15.6863	5.09303	17.8629	8.91167	20.4085	16.572	5.81669	68.3951	67.316	9.19769	16.5862	14.3337	14.5729	12.754	12.735	18.0124	9.35968	20.778	10.5027	18.2004	10.2177	14.041	50.2839	43.3934	14.348	12.2558	14.475	12.3699	11.2917	7.35194	11.56	11.7849	99.2706	16.098	10.7312
Zkscan3	13:21387873-21388518:-	38.1189	55.7571	57.4492	29.7729	27.594	21.6703	27.9491	30.7038	55.7322	19.8336	16.9498	51.5423	31.5966	34.0036	30.6697	24.2743	31.0367	56.0482	31.1377	41.1722	46.0793	46.4057	22.3864	61.2059	48.5408	46.9659	29.7555	31.4071	26.2157	23.8164	44.1795	42.5626	31.6136	26.6114	35.2731	38.3452	30.5615	39.1367	11.7477	33.3819	45.7207
Zkscan5	5:145218546-145221131:+	5.79538	7.74418	8.05588	7.62731	6.37786	4.84794	5.80627	6.7452	12.6126	3.13013	14.9655	12.8726	6.55256	8.10575	6.77414	7.74286	7.27968	9.83101	6.35643	10.5439	7.8583	9.45972	6.35288	12.7076	8.13559	8.53986	3.68204	5.19841	6.76683	10.7161	12.5437	10.7536	6.19828	8.63291	9.95512	6.39002	5.12947	7.2427	11.1679	6.22779	6.89294
Zkscan6	11:65828403-65828802:+	8.12241	7.43775	8.05507	6.98491	21.3138	5.17946	14.3281	8.71632	9.86864	3.09975	5.57177	13.7859	7.10063	9.77553	6.79301	4.48841	11.4584	9.6309	16.019	10.7542	12.8116	9.61624	6.58225	9.60651	8.90804	10.5801	13.6146	11.5754	10.6178	19.486	11.4543	11.8183	3.83087	5.93289	6.69796	4.63659	8.51145	10.3656	13.2517	14.0457	10.3254
Zkscan8	13:21520033-21520768:-	1.86416	8.4282	6.89203	5.84979	9.15292	1.68743	11.1833	4.73932	5.82167	1.79187	10.277	5.20366	5.55634	18.9702	14.1617	5.81822	8.64787	5.24406	14.5838	4.48724	3.90777	4.98207	3.17839	7.03695	4.2799	4.96127	6.64667	9.62101	11.9161	4.34232	4.74409	4.44349	12.7962	4.42988	3.11422	4.44091	3.01086	4.13289	1.894	4.25339	5.19111
