# Supplementary material for: KRAB-zinc finger protein gene expansion in response to active retrotransposons in the murine lineage
Source: eLife. 2020 Jun 1;9:e56337. doi: 10.7554/eLife.56337 (PMC7289599; doi:10.7554/eLife.56337)
Supplement: Figure 4—source data 1. — Genomic regions indicate cluster of supporting reads. [file elife-56337-fig4-data1.xlsx]

## Sheet: Unique novel insertion
Chrom	Start	End	Sample ID	Animal ID	Total insertion reads	Normalized reads (rpm)
chr1	10211812	10212065	QXT099	M05143	9	14.8219
chr1	20801909	20802467	QXT067	C7417	15	18.5165
chr1	23374742	23375442	QXT066	C7415	23	28.7205
chr1	34178978	34179566	QXT063	C6733	12	14.7618
chr1	35217429	35217866	QXT063	C6733	9	11.0713
chr1	38247839	38248268	QXT067	C7417	23	28.392
chr1	39733859	39734519	QXT063	C6733	24	29.5235
chr1	40817079	40817449	QXT086	H03384	11	17.3176
chr1	41418921	41419146	QXT094	M05139	7	10.8113
chr1	47093710	47094245	QXT085	H032265	9	13.3685
chr1	50755966	50756479	QXT068	C6767	14	17.653
chr1	51064184	51064694	QXT101	M05668	24	34.7675
chr1	58417039	58417380	QXT061	C6765	11	13.0397
chr1	58521192	58521656	QXT063	C6733	19	23.3728
chr1	59975195	59975645	QXT101	M05668	9	13.0378
chr1	68771253	68771883	QXT061	C6765	21	24.8939
chr1	72104514	72104772	QXT083	H04408	7	10.2364
chr1	75681194	75681542	QXT087	H03387	8	13.0087
chr1	76191401	76192091	QXT081	C5736	28	43.0945
chr1	77675863	77676325	QXT079	C7250	7	10.5433
chr1	88031855	88032326	QXT101	M05668	11	15.9351
chr1	90784225	90784558	QXT096	M05667	7	10.7327
chr1	91716968	91717438	QXT063	C6733	9	11.0713
chr1	91902429	91902940	QXT087	H03387	7	11.3826
chr1	92962964	92963526	QXT082	C5731	15	20.6752
chr1	100092838	100093304	QXT101	M05668	15	21.7297
chr1	103936564	103937363	QXT081	C5736	9	13.8518
chr1	128255346	128255987	QXT081	C5736	7	10.7736
chr1	134203626	134204039	QXT080	C5733	7	12.423
chr1	135104502	135105131	QXT082	C5731	25	34.4587
chr1	135275546	135275983	QXT095	M05141	8	12.9877
chr1	135740317	135740692	QXT075	C7416	17	20.5554
chr1	137258424	137258824	QXT101	M05668	7	10.1405
chr1	138116944	138117163	QXT086	H03384	7	11.0203
chr1	138770977	138771456	QXT063	C6733	16	19.6824
chr1	139121201	139121612	QXT063	C6733	10	12.3015
chr1	147623213	147623833	QXT068	C6767	9	11.3484
chr1	158442168	158442733	QXT086	H03384	13	20.4663
chr1	162802245	162802544	QXT086	H03384	8	12.5946
chr1	167169200	167170249	QXT066	C7415	11	13.7359
chr1	169779300	169779773	QXT063	C6733	13	15.9919
chr1	173129449	173130194	QXT066	C7415	16	19.9794
chr1	180537940	180538208	QXT085	H032265	8	11.8832
chr1	180879279	180879778	QXT087	H03387	14	22.7652
chr1	184494754	184495346	QXT087	H03387	12	19.5131
chr1	184654824	184655150	QXT086	H03384	12	18.8919
chr1	185892856	185893193	QXT099	M05143	7	11.5281
chr1	187135581	187136061	QXT067	C7417	10	12.3444
chr1	194384462	194384907	QXT086	H03384	8	12.5946
chr1	194816739	194817425	QXT067	C7417	10	12.3444
chr1	195368864	195369307	QXT095	M05141	12	19.4815
chr1	195959164	195959391	QXT021	T00436	8	10.6285
chr1	196841121	196842002	QXT101	M05668	14	20.281
chr10	5055113	5055545	QXT101	M05668	20	28.9729
chr10	13262701	13263222	QXT067	C7417	9	11.1099
chr10	40953033	40953505	QXT087	H03387	12	19.5131
chr10	44161750	44162069	QXT099	M05143	7	11.5281
chr10	68619953	68620487	QXT063	C6733	14	17.2221
chr10	74512789	74513253	QXT079	C7250	10	15.0619
chr10	78247857	78248302	QXT096	M05667	8	12.2659
chr10	82017452	82018060	QXT101	M05668	17	24.627
chr10	91420851	91421146	QXT075	C7416	9	10.8822
chr10	92959168	92959910	QXT066	C7415	12	14.9846
chr10	93863797	93864237	QXT094	M05139	13	20.0782
chr10	96885818	96886331	QXT067	C7417	21	25.9231
chr10	98031814	98032272	QXT063	C6733	11	13.5316
chr10	98687791	98688357	QXT075	C7416	15	18.1371
chr10	99336394	99336574	QXT101	M05668	7	10.1405
chr10	101280390	101280754	QXT080	C5733	12	21.2965
chr10	114709058	114709354	QXT101	M05668	12	17.3837
chr10	121682096	121682649	QXT061	C6765	14	16.596
chr10	125270366	125270691	QXT099	M05143	10	16.4687
chr10	125394995	125395404	QXT097	M05669	13	22.4003
chr10	128411368	128411728	QXT087	H03387	7	11.3826
chr11	4100117	4101364	QXT083	H04408	7	10.2364
chr11	12157478	12158071	QXT067	C7417	9	11.1099
chr11	19365023	19365569	QXT081	C5736	25	38.4772
chr11	23250110	23251462	QXT087	H03387	9	14.6348
chr11	28589218	28589704	QXT066	C7415	9	11.2384
chr11	32570678	32570987	QXT097	M05669	7	12.0617
chr11	35013161	35013745	QXT099	M05143	8	13.175
chr11	35094734	35095195	QXT068	C6767	15	18.914
chr11	36517606	36517915	QXT021	T00436	13	17.2713
chr11	37987735	37988193	QXT021	T00436	10	13.2856
chr11	44228656	44229014	QXT096	M05667	7	10.7327
chr11	50867575	50867962	QXT085	H032265	10	14.8539
chr11	51513142	51513495	QXT067	C7417	10	12.3444
chr11	57336438	57336850	QXT067	C7417	9	11.1099
chr11	59467774	59468331	QXT094	M05139	16	24.7116
chr11	60131237	60131831	QXT063	C6733	13	15.9919
chr11	62165470	62165836	QXT021	T00436	9	11.957
chr11	67094322	67094546	QXT086	H03384	7	11.0203
chr11	69019940	69020507	QXT101	M05668	9	13.0378
chr11	70325817	70327706	QXT082	C5731	13	17.9185
chr11	76852723	76853214	QXT085	H032265	21	31.1933
chr11	77679019	77679439	QXT068	C6767	8	10.0874
chr11	82198498	82198988	QXT079	C7250	8	12.0495
chr11	82839776	82840684	QXT063	C6733	12	14.7618
chr11	94254436	94254834	QXT063	C6733	9	11.0713
chr11	94473804	94474243	QXT097	M05669	6	10.3386
chr11	97311846	97312346	QXT094	M05139	11	16.9893
chr11	101794033	101794431	QXT097	M05669	6	10.3386
chr11	102697283	102697953	QXT094	M05139	15	23.1672
chr11	104406950	104407379	QXT068	C6767	22	27.7405
chr11	109618802	109619122	QXT094	M05139	8	12.3558
chr11	112857263	112857653	QXT086	H03384	7	11.0203
chr11	113273334	113273824	QXT067	C7417	9	11.1099
chr11	116839170	116839791	QXT101	M05668	8	11.5892
chr11	117174555	117174993	QXT101	M05668	17	24.627
chr11	117737780	117738207	QXT096	M05667	7	10.7327
chr11	119692710	119693256	QXT086	H03384	8	12.5946
chr11	120500524	120501073	QXT079	C7250	8	12.0495
chr11	120868154	120868509	QXT063	C6733	13	15.9919
chr11	121586936	121587301	QXT086	H03384	11	17.3176
chr12	4185418	4185855	QXT075	C7416	29	35.065
chr12	8079871	8080300	QXT085	H032265	10	14.8539
chr12	26958604	26958938	QXT057	C6926	10	13.2291
chr12	40460738	40461830	QXT082	C5731	8	11.0268
chr12	52052139	52052554	QXT096	M05667	17	26.0651
chr12	53373335	53373688	QXT067	C7417	13	16.0477
chr12	59474144	59474664	QXT068	C6767	10	12.6093
chr12	59742772	59743268	QXT068	C6767	10	12.6093
chr12	71621092	71621397	QXT079	C7250	7	10.5433
chr12	73896334	73896608	QXT094	M05139	8	12.3558
chr12	85781441	85781776	QXT063	C6733	11	13.5316
chr12	85939935	85940459	QXT066	C7415	29	36.2127
chr12	88734523	88734879	QXT099	M05143	7	11.5281
chr12	93150827	93151204	QXT099	M05143	8	13.175
chr12	93273189	93273649	QXT063	C6733	10	12.3015
chr12	95843095	95843378	QXT081	C5736	10	15.3909
chr12	98447330	98447755	QXT063	C6733	11	13.5316
chr12	103552309	103552735	QXT086	H03384	7	11.0203
chr12	104506723	104507248	QXT101	M05668	14	20.281
chr12	113362423	113362915	QXT087	H03387	11	17.887
chr12	113501210	113501492	QXT101	M05668	8	11.5892
chr12	114219020	114219562	QXT063	C6733	9	11.0713
chr12	114405051	114405606	QXT066	C7415	16	19.9794
chr12	118166218	118166903	QXT101	M05668	10	14.4865
chr13	7485268	7485758	QXT087	H03387	8	13.0087
chr13	10109639	10110132	QXT101	M05668	16	23.1783
chr13	20592292	20592695	QXT066	C7415	13	16.2333
chr13	25246040	25246946	QXT096	M05667	9	13.7992
chr13	30485785	30486084	QXT085	H032265	9	13.3685
chr13	33733366	33733868	QXT047	C6428	12	14.4348
chr13	34525914	34526385	QXT086	H03384	7	11.0203
chr13	34613219	34613692	QXT063	C6733	10	12.3015
chr13	37818232	37818882	QXT063	C6733	9	11.0713
chr13	39631644	39631848	QXT101	M05668	7	10.1405
chr13	40226629	40227310	QXT094	M05139	8	12.3558
chr13	40650015	40650319	QXT099	M05143	7	11.5281
chr13	44794221	44794712	QXT085	H032265	14	20.7955
chr13	53827009	53827379	QXT087	H03387	8	13.0087
chr13	57536206	57536667	QXT097	M05669	9	15.5079
chr13	58630949	58631431	QXT101	M05668	7	10.1405
chr13	63336134	63336520	QXT094	M05139	16	24.7116
chr13	67027189	67027489	QXT087	H03387	8	13.0087
chr13	71032850	71033229	QXT061	C6765	12	14.2251
chr13	71851544	71851888	QXT097	M05669	9	15.5079
chr13	84489992	84490361	QXT087	H03387	7	11.3826
chr13	95002163	95002684	QXT021	T00436	10	13.2856
chr13	95362229	95362577	QXT099	M05143	7	11.5281
chr13	101493450	101493750	QXT085	H032265	10	14.8539
chr13	108094108	108094474	QXT097	M05669	12	20.6772
chr13	111694865	111695522	QXT101	M05668	8	11.5892
chr13	115960546	115961001	QXT063	C6733	13	15.9919
chr13	120030080	120030545	QXT079	C7250	8	12.0495
chr14	13484903	13485425	QXT097	M05669	13	22.4003
chr14	14607128	14607648	QXT021	T00436	9	11.957
chr14	15588863	15589425	QXT079	C7250	8	12.0495
chr14	22909421	22909915	QXT101	M05668	18	26.0756
chr14	23584780	23585454	QXT087	H03387	19	30.8957
chr14	26315795	26316259	QXT101	M05668	10	14.4865
chr14	27320017	27320360	QXT097	M05669	6	10.3386
chr14	28084545	28084831	QXT063	C6733	10	12.3015
chr14	29687833	29688251	QXT094	M05139	7	10.8113
chr14	29710217	29710800	QXT063	C6733	16	19.6824
chr14	29956322	29956564	QXT094	M05139	8	12.3558
chr14	30372584	30374199	QXT079	C7250	11	16.5681
chr14	31910249	31911058	QXT085	H032265	12	17.8247
chr14	32005342	32005859	QXT096	M05667	20	30.6648
chr14	34024050	34024462	QXT086	H03384	11	17.3176
chr14	46405026	46405681	QXT101	M05668	9	13.0378
chr14	49330170	49330464	QXT096	M05667	10	15.3324
chr14	52914832	52915142	QXT083	H04408	7	10.2364
chr14	54736345	54736651	QXT067	C7417	13	16.0477
chr14	55966054	55966514	QXT068	C6767	8	10.0874
chr14	59044681	59045054	QXT097	M05669	6	10.3386
chr14	59308331	59308923	QXT101	M05668	12	17.3837
chr14	62828922	62829324	QXT087	H03387	10	16.2609
chr14	65587825	65588213	QXT096	M05667	7	10.7327
chr14	65908590	65908928	QXT079	C7250	8	12.0495
chr14	68885710	68886289	QXT066	C7415	10	12.4872
chr14	69849655	69850125	QXT099	M05143	11	18.1156
chr14	73765457	73766005	QXT095	M05141	13	21.105
chr14	77167432	77167744	QXT068	C6767	8	10.0874
chr14	77743372	77744113	QXT082	C5731	16	22.0536
chr14	79135818	79136195	QXT083	H04408	7	10.2364
chr14	79706184	79706550	QXT083	H04408	9	13.1611
chr14	85672463	85673162	QXT079	C7250	11	16.5681
chr14	87606946	87607434	QXT086	H03384	7	11.0203
chr14	89804708	89804967	QXT085	H032265	9	13.3685
chr14	90509258	90509671	QXT067	C7417	10	12.3444
chr14	100826777	100827094	QXT101	M05668	8	11.5892
chr14	101239567	101239865	QXT086	H03384	8	12.5946
chr14	103406285	103406688	QXT068	C6767	10	12.6093
chr14	117886685	117887441	QXT081	C5736	8	12.3127
chr14	118378198	118378437	QXT087	H03387	7	11.3826
chr14	123393081	123393905	QXT066	C7415	9	11.2384
chr15	8784657	8785233	QXT075	C7416	29	35.065
chr15	11227603	11227912	QXT086	H03384	8	12.5946
chr15	13131427	13131843	QXT085	H032265	9	13.3685
chr15	21562451	21562988	QXT001	T00431	26	30.3886
chr15	25691712	25691957	QXT083	H04408	7	10.2364
chr15	29676912	29677512	QXT063	C6733	13	15.9919
chr15	32880352	32880688	QXT081	C5736	11	16.93
chr15	36307680	36308154	QXT101	M05668	13	18.8324
chr15	37441766	37442218	QXT087	H03387	7	11.3826
chr15	50344932	50345379	QXT087	H03387	7	11.3826
chr15	50663037	50663695	QXT075	C7416	16	19.3462
chr15	55849778	55850336	QXT066	C7415	10	12.4872
chr15	61748535	61749015	QXT101	M05668	11	15.9351
chr15	63605919	63606519	QXT068	C6767	11	13.8702
chr15	63647104	63647292	QXT083	H04408	8	11.6988
chr15	63820520	63820856	QXT086	H03384	7	11.0203
chr15	78181092	78181393	QXT087	H03387	10	16.2609
chr15	78879788	78880311	QXT066	C7415	16	19.9794
chr15	79037273	79037526	QXT087	H03387	7	11.3826
chr15	81183149	81183459	QXT086	H03384	7	11.0203
chr15	81315136	81315755	QXT075	C7416	10	12.0914
chr15	82258279	82259095	QXT079	C7250	7	10.5433
chr15	82443227	82443742	QXT086	H03384	8	12.5946
chr15	83485889	83486286	QXT101	M05668	10	14.4865
chr15	83658234	83658461	QXT086	H03384	8	12.5946
chr15	91645882	91646396	QXT101	M05668	7	10.1405
chr15	93456924	93457394	QXT082	C5731	11	15.1618
chr15	93842478	93842728	QXT099	M05143	8	13.175
chr15	94216591	94216918	QXT080	C5733	7	12.423
chr15	94549155	94550059	QXT085	H032265	10	14.8539
chr15	97210133	97210587	QXT099	M05143	9	14.8219
chr15	97871207	97871668	QXT079	C7250	11	16.5681
chr15	101385366	101385620	QXT099	M05143	8	13.175
chr15	101778277	101778720	QXT063	C6733	23	28.2934
chr15	103291198	103291483	QXT068	C6767	13	16.3921
chr16	5187615	5188157	QXT101	M05668	14	20.281
chr16	6951940	6952380	QXT101	M05668	7	10.1405
chr16	10145562	10145869	QXT068	C6767	9	11.3484
chr16	10345322	10345623	QXT099	M05143	8	13.175
chr16	12577693	12578008	QXT080	C5733	8	14.1977
chr16	17129686	17130076	QXT087	H03387	7	11.3826
chr16	17524399	17524862	QXT079	C7250	11	16.5681
chr16	18217299	18217500	QXT099	M05143	7	11.5281
chr16	21859422	21859978	QXT079	C7250	18	27.1115
chr16	22972549	22972874	QXT080	C5733	6	10.6483
chr16	24305034	24305496	QXT101	M05668	9	13.0378
chr16	24739222	24739726	QXT068	C6767	11	13.8702
chr16	25300280	25300500	QXT085	H032265	10	14.8539
chr16	25823247	25823616	QXT085	H032265	10	14.8539
chr16	30197428	30197810	QXT094	M05139	10	15.4448
chr16	30605019	30605286	QXT094	M05139	8	12.3558
chr16	30755913	30756240	QXT079	C7250	9	13.5557
chr16	35052257	35052584	QXT087	H03387	10	16.2609
chr16	35119339	35119802	QXT063	C6733	11	13.5316
chr16	35478229	35478594	QXT099	M05143	7	11.5281
chr16	36550144	36550531	QXT094	M05139	10	15.4448
chr16	38390903	38391396	QXT068	C6767	21	26.4795
chr16	41901415	41902192	QXT096	M05667	10	15.3324
chr16	42334188	42334590	QXT063	C6733	9	11.0713
chr16	45993024	45993572	QXT068	C6767	10	12.6093
chr16	53326775	53327166	QXT085	H032265	9	13.3685
chr16	59144837	59145402	QXT094	M05139	10	15.4448
chr16	67513477	67514286	QXT067	C7417	11	13.5788
chr16	76144384	76144840	QXT067	C7417	10	12.3444
chr16	87751635	87752087	QXT094	M05139	9	13.9003
chr16	98166991	98167333	QXT085	H032265	11	16.3393
chr17	7653922	7654360	QXT021	T00436	10	13.2856
chr17	9226365	9226637	QXT095	M05141	10	16.2346
chr17	24618981	24619465	QXT085	H032265	9	13.3685
chr17	24727329	24727761	QXT081	C5736	8	12.3127
chr17	26407786	26408030	QXT067	C7417	10	12.3444
chr17	30978733	30979297	QXT057	C6926	15	19.8436
chr17	31933000	31933633	QXT101	M05668	8	11.5892
chr17	35168665	35169341	QXT079	C7250	12	18.0743
chr17	45963096	45963513	QXT086	H03384	7	11.0203
chr17	46133209	46133532	QXT075	C7416	10	12.0914
chr17	46975760	46976036	QXT096	M05667	7	10.7327
chr17	48044661	48045050	QXT087	H03387	8	13.0087
chr17	50075659	50076174	QXT074	C6927	9	11.1069
chr17	58325482	58325992	QXT087	H03387	11	17.887
chr17	58490417	58490838	QXT099	M05143	8	13.175
chr17	68020315	68020758	QXT061	C6765	12	14.2251
chr17	68144758	68145339	QXT067	C7417	17	20.9854
chr17	70871660	70871860	QXT094	M05139	7	10.8113
chr17	71260163	71260773	QXT063	C6733	16	19.6824
chr17	79588979	79589274	QXT101	M05668	8	11.5892
chr17	84332438	84332857	QXT086	H03384	10	15.7433
chr17	85006467	85006924	QXT094	M05139	8	12.3558
chr17	86666024	86666496	QXT080	C5733	16	28.3954
chr17	87350498	87350818	QXT096	M05667	10	15.3324
chr17	88272227	88272582	QXT096	M05667	13	19.9321
chr17	89025041	89025518	QXT063	C6733	10	12.3015
chr17	89589657	89590097	QXT086	H03384	8	12.5946
chr18	4293074	4293493	QXT067	C7417	9	11.1099
chr18	12154606	12155058	QXT080	C5733	7	12.423
chr18	13448634	13449089	QXT086	H03384	18	28.3379
chr18	13526481	13527077	QXT101	M05668	11	15.9351
chr18	15228199	15228804	QXT101	M05668	15	21.7297
chr18	15411748	15412098	QXT085	H032265	9	13.3685
chr18	16743802	16744444	QXT082	C5731	13	17.9185
chr18	25638122	25638620	QXT021	T00436	8	10.6285
chr18	29290720	29291072	QXT087	H03387	7	11.3826
chr18	30415736	30416187	QXT068	C6767	9	11.3484
chr18	31959656	31961037	QXT063	C6733	11	13.5316
chr18	35037966	35038322	QXT094	M05139	8	12.3558
chr18	36683304	36683637	QXT099	M05143	7	11.5281
chr18	38224984	38225457	QXT066	C7415	9	11.2384
chr18	38259019	38259535	QXT082	C5731	13	17.9185
chr18	38411806	38412282	QXT085	H032265	8	11.8832
chr18	38738710	38739201	QXT068	C6767	8	10.0874
chr18	38928044	38928314	QXT083	H04408	7	10.2364
chr18	39893072	39893452	QXT067	C7417	10	12.3444
chr18	42573392	42573837	QXT085	H032265	7	10.3978
chr18	47235988	47236418	QXT087	H03387	17	27.6435
chr18	52711285	52711713	QXT061	C6765	11	13.0397
chr18	54149704	54150089	QXT083	H04408	21	30.7093
chr18	54303451	54303893	QXT101	M05668	17	24.627
chr18	54350689	54350910	QXT068	C6767	9	11.3484
chr18	57540861	57541214	QXT085	H032265	9	13.3685
chr18	58704861	58705447	QXT063	C6733	19	23.3728
chr18	61843187	61843711	QXT101	M05668	9	13.0378
chr18	63323593	63324011	QXT085	H032265	9	13.3685
chr18	63774938	63775292	QXT085	H032265	11	16.3393
chr18	67751070	67751708	QXT080	C5733	8	14.1977
chr18	69287542	69287938	QXT068	C6767	8	10.0874
chr18	71051847	71052278	QXT085	H032265	10	14.8539
chr18	78057714	78058102	QXT079	C7250	7	10.5433
chr18	79661139	79661748	QXT082	C5731	21	28.9453
chr18	81648131	81648701	QXT063	C6733	12	14.7618
chr19	6476474	6476790	QXT083	H04408	8	11.6988
chr19	10484876	10485530	QXT094	M05139	53	81.8573
chr19	12074291	12074881	QXT079	C7250	7	10.5433
chr19	16923760	16923976	QXT085	H032265	11	16.3393
chr19	17012608	17013117	QXT067	C7417	27	33.3298
chr19	17866048	17866559	QXT086	H03384	11	17.3176
chr19	18596885	18597280	QXT080	C5733	6	10.6483
chr19	18685803	18686353	QXT063	C6733	14	17.2221
chr19	19136803	19137372	QXT101	M05668	10	14.4865
chr19	29781819	29782251	QXT086	H03384	8	12.5946
chr19	32838073	32838331	QXT085	H032265	7	10.3978
chr19	33228479	33229115	QXT066	C7415	11	13.7359
chr19	35147054	35147501	QXT063	C6733	17	20.9125
chr19	36126860	36127261	QXT086	H03384	11	17.3176
chr19	36457476	36457769	QXT099	M05143	8	13.175
chr19	37620413	37620758	QXT087	H03387	7	11.3826
chr19	38012650	38012927	QXT063	C6733	11	13.5316
chr19	38065522	38065773	QXT097	M05669	6	10.3386
chr19	41190192	41190417	QXT086	H03384	7	11.0203
chr19	42929926	42930404	QXT094	M05139	15	23.1672
chr19	46594903	46595269	QXT099	M05143	8	13.175
chr19	47908036	47908523	QXT063	C6733	9	11.0713
chr19	51203765	51204106	QXT063	C6733	9	11.0713
chr19	52147006	52147447	QXT099	M05143	21	34.5844
chr19	53737086	53737399	QXT080	C5733	6	10.6483
chr19	56178253	56178631	QXT074	C6927	10	12.341
chr2	4510005	4510509	QXT087	H03387	12	19.5131
chr2	11844903	11845294	QXT067	C7417	13	16.0477
chr2	16426353	16426581	QXT081	C5736	7	10.7736
chr2	17299813	17300298	QXT005	T09673	11	12.1887
chr2	20444145	20444820	QXT079	C7250	15	22.5929
chr2	24754214	24754809	QXT085	H032265	9	13.3685
chr2	29394786	29395285	QXT079	C7250	10	15.0619
chr2	30823381	30824158	QXT087	H03387	16	26.0174
chr2	31052104	31052567	QXT066	C7415	23	28.7205
chr2	32512139	32512810	QXT101	M05668	11	15.9351
chr2	32850750	32851240	QXT063	C6733	13	15.9919
chr2	33263459	33263828	QXT097	M05669	16	27.5696
chr2	35636452	35637022	QXT061	C6765	36	42.6753
chr2	46140340	46140664	QXT063	C6733	13	15.9919
chr2	48213409	48213926	QXT067	C7417	9	11.1099
chr2	50129239	50129514	QXT101	M05668	7	10.1405
chr2	50524259	50524694	QXT086	H03384	15	23.6149
chr2	53383432	53383793	QXT079	C7250	8	12.0495
chr2	57213745	57214169	QXT085	H032265	11	16.3393
chr2	59372377	59372887	QXT079	C7250	11	16.5681
chr2	70476978	70477313	QXT057	C6926	9	11.9061
chr2	72270610	72271085	QXT083	H04408	18	26.3222
chr2	72596347	72596759	QXT068	C6767	8	10.0874
chr2	73944270	73945228	QXT061	C6765	24	28.4502
chr2	74574426	74574879	QXT075	C7416	9	10.8822
chr2	77337326	77337845	QXT063	C6733	12	14.7618
chr2	83683405	83683853	QXT097	M05669	6	10.3386
chr2	86653142	86653514	QXT086	H03384	14	22.0406
chr2	89240062	89240595	QXT082	C5731	10	13.7835
chr2	91313202	91313524	QXT085	H032265	7	10.3978
chr2	109669029	109669380	QXT094	M05139	11	16.9893
chr2	112505351	112505950	QXT101	M05668	12	17.3837
chr2	113666471	113666747	QXT087	H03387	8	13.0087
chr2	119733333	119733852	QXT079	C7250	7	10.5433
chr2	123989123	123989564	QXT081	C5736	9	13.8518
chr2	124590546	124591072	QXT067	C7417	20	24.6887
chr2	127207971	127208635	QXT005	T09673	10	11.0806
chr2	127686926	127687336	QXT099	M05143	8	13.175
chr2	130225654	130225961	QXT094	M05139	9	13.9003
chr2	131669762	131670387	QXT101	M05668	17	24.627
chr2	132012311	132012777	QXT085	H032265	11	16.3393
chr2	132205582	132206002	QXT096	M05667	9	13.7992
chr2	133487824	133488288	QXT075	C7416	10	12.0914
chr2	133499437	133499697	QXT101	M05668	8	11.5892
chr2	135513955	135514867	QXT068	C6767	14	17.653
chr2	135815028	135816081	QXT086	H03384	12	18.8919
chr2	136532938	136533269	QXT099	M05143	7	11.5281
chr2	137236230	137236525	QXT087	H03387	7	11.3826
chr2	141030214	141030988	QXT068	C6767	10	12.6093
chr2	153216043	153216490	QXT005	T09673	10	11.0806
chr2	155318525	155318838	QXT079	C7250	7	10.5433
chr2	156198093	156198604	QXT021	T00436	10	13.2856
chr2	157709664	157710011	QXT097	M05669	6	10.3386
chr2	158212206	158212832	QXT063	C6733	17	20.9125
chr2	160363464	160363831	QXT094	M05139	15	23.1672
chr2	162906939	162908107	QXT096	M05667	19	29.1315
chr2	164790187	164790664	QXT063	C6733	9	11.0713
chr2	165443125	165443478	QXT085	H032265	9	13.3685
chr2	166232305	166232751	QXT087	H03387	9	14.6348
chr2	167648504	167648942	QXT101	M05668	11	15.9351
chr2	168595152	168595486	QXT075	C7416	17	20.5554
chr2	172437198	172437522	QXT094	M05139	18	27.8006
chr2	178290635	178291133	QXT066	C7415	12	14.9846
chr2	179505527	179505892	QXT063	C6733	12	14.7618
chr2	179713513	179713828	QXT101	M05668	7	10.1405
chr2	180065794	180066215	QXT063	C6733	9	11.0713
chr2	180524137	180524669	QXT063	C6733	16	19.6824
chr2	181317127	181317736	QXT099	M05143	16	26.35
chr3	10409181	10409863	QXT099	M05143	21	34.5844
chr3	30420937	30421456	QXT066	C7415	16	19.9794
chr3	33662089	33662469	QXT101	M05668	11	15.9351
chr3	37460125	37460562	QXT066	C7415	10	12.4872
chr3	38495567	38495942	QXT097	M05669	9	15.5079
chr3	39232599	39232950	QXT096	M05667	12	18.3989
chr3	39979728	39980011	QXT097	M05669	7	12.0617
chr3	40839140	40840277	QXT086	H03384	8	12.5946
chr3	51584392	51584623	QXT101	M05668	7	10.1405
chr3	52122391	52122832	QXT087	H03387	7	11.3826
chr3	53240141	53240589	QXT085	H032265	21	31.1933
chr3	63381725	63382127	QXT099	M05143	16	26.35
chr3	65600351	65600696	QXT075	C7416	9	10.8822
chr3	66396002	66396816	QXT079	C7250	14	21.0867
chr3	74463244	74464231	QXT063	C6733	10	12.3015
chr3	76111787	76112155	QXT080	C5733	12	21.2965
chr3	87344134	87344655	QXT094	M05139	17	26.2561
chr3	87643952	87645390	QXT067	C7417	11	13.5788
chr3	87727364	87727790	QXT087	H03387	10	16.2609
chr3	88334114	88334628	QXT094	M05139	13	20.0782
chr3	88521249	88521507	QXT075	C7416	10	12.0914
chr3	89405029	89405660	QXT079	C7250	12	18.0743
chr3	89978328	89978764	QXT099	M05143	12	19.7625
chr3	91668346	91668784	QXT086	H03384	7	11.0203
chr3	95988550	95988915	QXT097	M05669	7	12.0617
chr3	100754347	100754913	QXT068	C6767	25	31.5233
chr3	101485473	101485794	QXT101	M05668	11	15.9351
chr3	104406263	104406720	QXT087	H03387	10	16.2609
chr3	107354389	107354983	QXT068	C6767	21	26.4795
chr3	111806541	111806831	QXT095	M05141	8	12.9877
chr3	118829466	118829913	QXT094	M05139	8	12.3558
chr3	120981977	120982364	QXT101	M05668	13	18.8324
chr3	121749746	121750291	QXT067	C7417	25	30.8609
chr3	121836663	121838080	QXT075	C7416	12	14.5097
chr3	126382432	126383060	QXT005	T09673	13	14.4048
chr3	132410946	132411293	QXT086	H03384	12	18.8919
chr3	137536721	137537087	QXT067	C7417	15	18.5165
chr3	144879752	144880136	QXT101	M05668	8	11.5892
chr3	147807763	147808018	QXT101	M05668	7	10.1405
chr3	148098596	148099134	QXT068	C6767	8	10.0874
chr3	148811721	148812353	QXT101	M05668	17	24.627
chr3	153336580	153336851	QXT085	H032265	7	10.3978
chr4	4071128	4071621	QXT067	C7417	16	19.751
chr4	8892192	8892646	QXT101	M05668	9	13.0378
chr4	10829971	10830307	QXT067	C7417	16	19.751
chr4	20923241	20923668	QXT079	C7250	9	13.5557
chr4	44949707	44950352	QXT063	C6733	11	13.5316
chr4	48218393	48218820	QXT079	C7250	9	13.5557
chr4	53194552	53194981	QXT063	C6733	14	17.2221
chr4	55270434	55270875	QXT005	T09673	16	17.729
chr4	56600810	56601441	QXT079	C7250	8	12.0495
chr4	58954243	58954667	QXT099	M05143	8	13.175
chr4	59690615	59691149	QXT063	C6733	13	15.9919
chr4	63721905	63722305	QXT101	M05668	8	11.5892
chr4	71668904	71669478	QXT094	M05139	16	24.7116
chr4	73086363	73086846	QXT075	C7416	15	18.1371
chr4	75734911	75735609	QXT094	M05139	9	13.9003
chr4	83069249	83069668	QXT063	C6733	15	18.4522
chr4	87627136	87627632	QXT079	C7250	7	10.5433
chr4	88556959	88557519	QXT066	C7415	12	14.9846
chr4	91921351	91921911	QXT067	C7417	21	25.9231
chr4	99430266	99430631	QXT087	H03387	7	11.3826
chr4	102907192	102907570	QXT094	M05139	7	10.8113
chr4	106217926	106218325	QXT097	M05669	12	20.6772
chr4	110552458	110553212	QXT087	H03387	17	27.6435
chr4	123420838	123421130	QXT101	M05668	7	10.1405
chr4	123556427	123556900	QXT063	C6733	13	15.9919
chr4	125645755	125646136	QXT079	C7250	7	10.5433
chr4	126010701	126011241	QXT061	C6765	23	27.2648
chr4	128546666	128546941	QXT097	M05669	6	10.3386
chr4	129390488	129390996	QXT061	C6765	10	11.8543
chr4	130553778	130554248	QXT099	M05143	17	27.9969
chr4	131626591	131627028	QXT080	C5733	13	23.0712
chr4	131664044	131664625	QXT068	C6767	11	13.8702
chr4	134611096	134611632	QXT063	C6733	22	27.0632
chr4	135374448	135375001	QXT075	C7416	16	19.3462
chr4	137712540	137712966	QXT079	C7250	12	18.0743
chr4	138997105	138997761	QXT068	C6767	8	10.0874
chr4	139126657	139127064	QXT066	C7415	9	11.2384
chr4	140785441	140785823	QXT063	C6733	17	20.9125
chr4	142439783	142440120	QXT085	H032265	9	13.3685
chr4	148222163	148222479	QXT094	M05139	7	10.8113
chr4	148494143	148494762	QXT101	M05668	8	11.5892
chr4	151199633	151200100	QXT101	M05668	21	30.4216
chr4	155462201	155462706	QXT063	C6733	14	17.2221
chr5	4672837	4673721	QXT101	M05668	15	21.7297
chr5	9068953	9069192	QXT086	H03384	8	12.5946
chr5	12059542	12060190	QXT066	C7415	15	18.7307
chr5	13391276	13391977	QXT063	C6733	17	20.9125
chr5	20990273	20990808	QXT099	M05143	20	32.9375
chr5	25002287	25002641	QXT066	C7415	10	12.4872
chr5	30219679	30220361	QXT068	C6767	13	16.3921
chr5	38193633	38193905	QXT085	H032265	7	10.3978
chr5	38520885	38521353	QXT094	M05139	11	16.9893
chr5	38701850	38702265	QXT085	H032265	8	11.8832
chr5	45362309	45362527	QXT087	H03387	8	13.0087
chr5	68117252	68117855	QXT094	M05139	7	10.8113
chr5	89894864	89895388	QXT101	M05668	14	20.281
chr5	93404638	93404835	QXT086	H03384	7	11.0203
chr5	96456561	96457025	QXT067	C7417	19	23.4543
chr5	98462999	98463332	QXT086	H03384	8	12.5946
chr5	98790934	98791303	QXT101	M05668	9	13.0378
chr5	107914221	107914677	QXT085	H032265	12	17.8247
chr5	111478141	111478443	QXT099	M05143	7	11.5281
chr5	113449101	113450471	QXT079	C7250	15	22.5929
chr5	115517123	115517567	QXT068	C6767	12	15.1312
chr5	116645828	116646244	QXT061	C6765	11	13.0397
chr5	118139945	118140416	QXT087	H03387	14	22.7652
chr5	123371692	123371948	QXT087	H03387	9	14.6348
chr5	123580534	123580988	QXT081	C5736	10	15.3909
chr5	124441203	124441644	QXT087	H03387	7	11.3826
chr5	127271534	127271831	QXT079	C7250	7	10.5433
chr5	129668088	129668365	QXT068	C6767	8	10.0874
chr5	130652917	130653450	QXT094	M05139	9	13.9003
chr5	132317113	132317632	QXT094	M05139	9	13.9003
chr5	135620055	135620708	QXT101	M05668	28	40.5621
chr5	139411412	139411957	QXT061	C6765	12	14.2251
chr5	140461342	140462217	QXT094	M05139	9	13.9003
chr5	144818304	144818820	QXT096	M05667	10	15.3324
chr6	4785551	4785871	QXT086	H03384	11	17.3176
chr6	16225207	16225632	QXT079	C7250	13	19.5805
chr6	27304796	27305302	QXT079	C7250	15	22.5929
chr6	27356812	27357192	QXT075	C7416	10	12.0914
chr6	29103454	29103745	QXT061	C6765	14	16.596
chr6	30652849	30653470	QXT101	M05668	12	17.3837
chr6	33433251	33433721	QXT063	C6733	11	13.5316
chr6	50500760	50501356	QXT094	M05139	12	18.5337
chr6	50521985	50522440	QXT094	M05139	7	10.8113
chr6	51554570	51555080	QXT021	T00436	12	15.9427
chr6	52831402	52831909	QXT067	C7417	24	29.6264
chr6	53181879	53182271	QXT081	C5736	7	10.7736
chr6	54794814	54795389	QXT099	M05143	22	36.2312
chr6	61334996	61335515	QXT082	C5731	10	13.7835
chr6	72719941	72720330	QXT085	H032265	12	17.8247
chr6	82786361	82786835	QXT086	H03384	17	26.7636
chr6	83702416	83702803	QXT066	C7415	9	11.2384
chr6	85411967	85412524	QXT079	C7250	15	22.5929
chr6	86776074	86776662	QXT094	M05139	19	29.3451
chr6	86867667	86868180	QXT086	H03384	9	14.1689
chr6	93948579	93949086	QXT085	H032265	15	22.2809
chr6	96635619	96636320	QXT087	H03387	7	11.3826
chr6	98261611	98262103	QXT086	H03384	10	15.7433
chr6	99045207	99045651	QXT081	C5736	9	13.8518
chr6	99079097	99079569	QXT005	T09673	16	17.729
chr6	100147292	100147854	QXT063	C6733	14	17.2221
chr6	104085991	104086501	QXT086	H03384	12	18.8919
chr6	108314061	108314374	QXT099	M05143	7	11.5281
chr6	116674313	116675072	QXT067	C7417	26	32.0953
chr6	120109743	120109963	QXT086	H03384	11	17.3176
chr6	120528491	120528966	QXT081	C5736	11	16.93
chr6	120889871	120890162	QXT079	C7250	8	12.0495
chr6	125757941	125758258	QXT085	H032265	12	17.8247
chr6	126120157	126120571	QXT063	C6733	17	20.9125
chr6	127408468	127408764	QXT094	M05139	8	12.3558
chr6	127626430	127627061	QXT101	M05668	16	23.1783
chr6	128076987	128077374	QXT085	H032265	7	10.3978
chr6	128999865	129000338	QXT075	C7416	10	12.0914
chr6	129374781	129375191	QXT021	T00436	8	10.6285
chr6	131315670	131315995	QXT099	M05143	7	11.5281
chr6	131415532	131415842	QXT085	H032265	8	11.8832
chr6	135269692	135270129	QXT075	C7416	16	19.3462
chr6	135876160	135876668	QXT057	C6926	10	13.2291
chr6	140614133	140614643	QXT079	C7250	8	12.0495
chr6	144995048	144995670	QXT087	H03387	8	13.0087
chr6	147565491	147565796	QXT085	H032265	9	13.3685
chr6	149354054	149354640	QXT094	M05139	11	16.9893
chr7	31754870	31755200	QXT086	H03384	7	11.0203
chr7	35447471	35448480	QXT085	H032265	7	10.3978
chr7	53568250	53568669	QXT079	C7250	23	34.6424
chr7	56937876	56938329	QXT087	H03387	10	16.2609
chr7	59426434	59426897	QXT101	M05668	34	49.2539
chr7	60262297	60262897	QXT086	H03384	7	11.0203
chr7	64116110	64116668	QXT096	M05667	12	18.3989
chr7	70412040	70412450	QXT083	H04408	10	14.6235
chr7	73649219	73649559	QXT067	C7417	12	14.8132
chr7	76071054	76071740	QXT075	C7416	9	10.8822
chr7	77178112	77178604	QXT099	M05143	10	16.4687
chr7	77899275	77899728	QXT061	C6765	13	15.4105
chr7	80467884	80468306	QXT101	M05668	8	11.5892
chr7	89711599	89712216	QXT101	M05668	23	33.3188
chr7	90672480	90672975	QXT101	M05668	9	13.0378
chr7	98697908	98698472	QXT086	H03384	9	14.1689
chr7	99922095	99922756	QXT063	C6733	31	38.1346
chr7	106807117	106807685	QXT086	H03384	7	11.0203
chr7	107054697	107055169	QXT079	C7250	7	10.5433
chr7	120139957	120140346	QXT063	C6733	11	13.5316
chr7	120183333	120183627	QXT061	C6765	10	11.8543
chr7	121400558	121400946	QXT066	C7415	11	13.7359
chr7	121455232	121455697	QXT083	H04408	11	16.0858
chr7	124631040	124631529	QXT087	H03387	13	21.1391
chr7	126339972	126340393	QXT101	M05668	29	42.0107
chr7	134443424	134443854	QXT099	M05143	18	29.6437
chr7	135819238	135819646	QXT094	M05139	9	13.9003
chr7	137604097	137604517	QXT063	C6733	10	12.3015
chr7	137740632	137741015	QXT085	H032265	7	10.3978
chr7	138085834	138086319	QXT080	C5733	11	19.5218
chr7	139354584	139355259	QXT087	H03387	14	22.7652
chr7	139808416	139808888	QXT081	C5736	9	13.8518
chr7	140396408	140396636	QXT083	H04408	7	10.2364
chr7	142494460	142495208	QXT063	C6733	10	12.3015
chr7	142929611	142929885	QXT095	M05141	7	11.3642
chr7	143835223	143835799	QXT097	M05669	9	15.5079
chr7	146043453	146043929	QXT099	M05143	12	19.7625
chr7	149481765	149482130	QXT086	H03384	8	12.5946
chr8	9062772	9063085	QXT095	M05141	11	17.8581
chr8	10770420	10771111	QXT021	T00436	28	37.1997
chr8	12525670	12525990	QXT101	M05668	12	17.3837
chr8	18895417	18896960	QXT068	C6767	10	12.6093
chr8	27845498	27845875	QXT099	M05143	16	26.35
chr8	46933791	46934366	QXT094	M05139	7	10.8113
chr8	58471835	58472982	QXT101	M05668	9	13.0378
chr8	63544290	63544708	QXT079	C7250	8	12.0495
chr8	64117285	64117765	QXT066	C7415	11	13.7359
chr8	68694310	68694677	QXT067	C7417	11	13.5788
chr8	69423395	69423669	QXT086	H03384	7	11.0203
chr8	89305264	89305725	QXT085	H032265	10	14.8539
chr8	91440723	91441093	QXT079	C7250	8	12.0495
chr8	94538141	94538501	QXT021	T00436	9	11.957
chr8	100818626	100819091	QXT067	C7417	13	16.0477
chr8	108084623	108085143	QXT061	C6765	18	21.3377
chr8	109731165	109731492	QXT101	M05668	10	14.4865
chr8	112144466	112144755	QXT097	M05669	11	18.9541
chr8	114360476	114360856	QXT061	C6765	9	10.6688
chr8	117759976	117760379	QXT086	H03384	25	39.3582
chr8	118145342	118145745	QXT094	M05139	8	12.3558
chr8	118864949	118865353	QXT081	C5736	10	15.3909
chr8	122761777	122763156	QXT087	H03387	9	14.6348
chr8	122913241	122913598	QXT082	C5731	8	11.0268
chr8	123240807	123241279	QXT079	C7250	12	18.0743
chr8	125274105	125274677	QXT099	M05143	7	11.5281
chr8	127198719	127198972	QXT099	M05143	12	19.7625
chr8	128397009	128397309	QXT085	H032265	9	13.3685
chr8	129316226	129316720	QXT087	H03387	11	17.887
chr8	129774408	129774693	QXT087	H03387	8	13.0087
chr9	4163183	4163764	QXT066	C7415	29	36.2127
chr9	8898527	8898897	QXT099	M05143	7	11.5281
chr9	13278922	13279470	QXT094	M05139	16	24.7116
chr9	13404336	13404950	QXT086	H03384	12	18.8919
chr9	20244919	20245302	QXT101	M05668	8	11.5892
chr9	20494008	20494485	QXT068	C6767	11	13.8702
chr9	21179805	21180207	QXT094	M05139	19	29.3451
chr9	22259292	22260073	QXT097	M05669	9	15.5079
chr9	22604179	22604574	QXT094	M05139	11	16.9893
chr9	23102718	23103330	QXT061	C6765	19	22.5231
chr9	30661563	30661737	QXT085	H032265	8	11.8832
chr9	33093931	33094381	QXT099	M05143	10	16.4687
chr9	36774806	36775187	QXT101	M05668	8	11.5892
chr9	45490111	45490413	QXT096	M05667	8	12.2659
chr9	45666127	45666467	QXT097	M05669	6	10.3386
chr9	47325576	47325971	QXT086	H03384	16	25.1892
chr9	49368914	49369299	QXT099	M05143	7	11.5281
chr9	52006921	52007263	QXT063	C6733	9	11.0713
chr9	57588146	57588761	QXT079	C7250	15	22.5929
chr9	58950906	58952593	QXT068	C6767	8	10.0874
chr9	66223323	66223607	QXT101	M05668	9	13.0378
chr9	66531694	66531985	QXT096	M05667	7	10.7327
chr9	66870931	66871254	QXT067	C7417	11	13.5788
chr9	69274463	69274896	QXT068	C6767	11	13.8702
chr9	69545225	69545517	QXT097	M05669	6	10.3386
chr9	69852804	69853207	QXT067	C7417	10	12.3444
chr9	69972194	69972647	QXT094	M05139	9	13.9003
chr9	70142959	70143372	QXT094	M05139	12	18.5337
chr9	70198339	70198882	QXT082	C5731	12	16.5402
chr9	70785474	70786073	QXT101	M05668	9	13.0378
chr9	73951353	73951900	QXT045	T00869	8	10.8625
chr9	83591986	83592444	QXT101	M05668	10	14.4865
chr9	92448989	92449441	QXT075	C7416	9	10.8822
chr9	99316723	99317411	QXT085	H032265	21	31.1933
chr9	103270294	103270676	QXT095	M05141	15	24.3519
chr9	104560787	104561083	QXT099	M05143	10	16.4687
chr9	107347037	107347533	QXT005	T09673	18	19.9451
chr9	107900693	107901291	QXT066	C7415	19	23.7256
chr9	112133746	112134058	QXT082	C5731	12	16.5402
chr9	114449651	114449886	QXT086	H03384	7	11.0203
chr9	118012893	118013320	QXT097	M05669	9	15.5079
chrX	6456479	6456987	QXT021	T00436	13	17.2713
chrX	14102043	14102408	QXT067	C7417	9	11.1099
chrX	45557102	45557650	QXT021	T00436	17	22.5855
chrX	54117742	54117838	QXT095	M05141	8	12.9877
chrX	54767329	54768003	QXT005	T09673	30	33.2418
chrX	71329135	71329686	QXT063	C6733	14	17.2221
chrX	95403483	95404053	QXT063	C6733	18	22.1426
chrX	97419694	97420250	QXT081	C5736	10	15.3909
chrX	99215641	99215889	QXT083	H04408	11	16.0858
chrX	99320842	99321099	QXT085	H032265	10	14.8539
chrX	115850907	115851383	QXT087	H03387	7	11.3826
chrX	133604684	133605413	QXT101	M05668	18	26.0756
chrX	156160658	156161020	QXT101	M05668	8	11.5892
chrY	550789	551153	QXT101	M05668	7	10.1405
chrY	2562665	2563091	QXT085	H032265	8	11.8832

## Sheet: Shared novel insertions
Chrom	Start	End	Sample ID	Animal ID	Total insertion reads	Normalized reads (rpm)
chr11	46034230	46035369	QXT074	C6927	212	261.63
chr11	46034230	46035369	QXT075	C7416	202	244.246
chr11	46034230	46035369	QXT094	M05139	189	291.906
chr11	46034230	46035369	QXT095	M05141	158	256.507
chr11	46034230	46035369	QXT096	M05667	191	292.849
chr11	46034230	46035369	QXT100	M05666	184	268.338
chr6	51549776	51550984	QXT067	C7417	216	266.638
chr6	51549776	51550984	QXT071	C6921	208	263.134
chr6	51549776	51550984	QXT073	C6925	250	288.972
chr15	55654316	55655079	QXT096	M05667	185	283.649
chr15	55654316	55655079	QXT099	M05143	177	291.497
