# Supplementary material for: KRAB-zinc finger protein gene expansion in response to active retrotransposons in the murine lineage
Source: eLife. 2020 Jun 1;9:e56337. doi: 10.7554/eLife.56337 (PMC7289599; doi:10.7554/eLife.56337)
Supplement: Supplementary file 3. [file elife-56337-supp3.xlsx]

## Sheet: Sheet1
CRISPR/Cas9 sequences	Mutation	gRNA1	gRNA2	Repair homology template	Repair template sequence
	Chr2-cl KO	GCCGTTGCTCAGTCCAAATG	GATACCAGAGGTGGCCGCAAG	ssDNA oligo	AACCTTTTAATCCTCTATAGATGGAACCTATAGAAATTGTATAGAAAAATGAAGCCCCATAAGAGGGCAACAAGCATCTACCTGACCCACAGTTTCCCCAGGGTAATTGCAAGCTACTGC
	Chr4-cl KO	GCAAAGGGGCTCCTCGATGGA	GTTTATGGCCGTGCTAAGGTC	ssDNA oligo	CCCTAAGCTAGGGTAATTGTTTCAATGCTGTCCCTGGTCATACAAACCTTACCATCGGTTAGCACGGCCATAAACTTGTCTTCACTACTCAGCTATGTCTCTAGACCTGTAAATATT
	Chr10-cl KO	GTTGCCTTCATCCCACCGTG	GAAGTTCGACTTGGACGGGCT	ssDNA oligo	AGAAATATATTGTTTTACAATAAGGACTCCCATGTTGACTCAGGTTGCCTTCATCGCACACCGTGCAAGTCGAACTTAAACTACCTAATTGATACGCACCATTCAGGCATTAGCAATTAC
	Chr13.1-cl KO	GTAACCCATCATGGGCCCTAC	GGACAGGTTATAGGTTTGAT	ssDNA oligo	GTTCTTTAACTTTGTTTTGTGTGTGGGCATCATAAGGCTTGATTTTTAATGAGACCAGTAGATGGGGTGGGGACTGAAAGGCTTTATCGTCTAATTGGAGACTGCCACGTGGGGTATGCA
	Chr13.2-cl KO	GGGTTTCTGAGAAACGTGTA	GTGTAATGAGTTCTTATATC	ssDNA oligo	CTTGCACACTATCAAATTCAGTTGCCAACACAAGGTACCTGTACTGCACTTCTTCCATTCATAAGAACTCATTACACACTTTGGATCATGCAGATAAGTCTGTGAGGACATCAGTATGTT
	Chst1-MMETn KO	GACAGCACCAAGTTGCACAT	GTCTATGGCCCTTGCTCATGC	ssDNA oligo	GCAGAGCTCCAGGACTCCACGGGCAGCCTGGCCATAGCTGCTCTCCTGCCCCATGTGAGCAAGGGCCATAGACATGGAGAGAATATAGCTATGGAATTTTAGCCCTTGAC
	KAP1-GFP KI	GCAGCTTCAGGGGCCATCACC	-	dsDNA fragment in pUC57	TAGCAGGCAGGGGAAAGAAAAGCCAGGACCCACTCACGTGTGTATTCTTAATTGGAACAGGACAAGGCAGATGTTCAGTCCATCATCGGCTTGCAGCGCTTCTTTGAGACACGCATGAATGATGCCTTTGGTGACACCAAGTTTTCTGCTGTGCTGGTAGAACCACCACCATTGAACCTTCCCAGTGCTGGCCTAAGTTCTCAGGAGCTCTCTGGCCCTGGTGATGGCCCCGGATCCGTGAGCAAGGGCGAGGAGCTGTTCACCGGGGTGGTGCCCATCCTGGTCGAGCTGGACGGCGACGTAAACGGCCACAAGTTCAGCGTCCGCGGCGAGGGCGAGGGCGATGCCACCAACGGCAAGCTGACCCTGAAGTTCATCTGCACCACCGGCAAGCTGCCC…
Genotyping primer	Genotype	FW	RV
	Chr2-cl KO	GTCTTGGAGAAATGGGGTGCT	AGACAGGGGCTTTTCCAGAAG
	Chr2-cl WT	AAACATCAGGGCACAGTCACA	GCCCTTGGTTCTTTTGGAGTTG
	Chr4-cl KO	CAGGAAACAGGCAGCAGTTGA	GGTCTAGAGACATAGCTGAGTAGTG
	Chr4-cl WT	GTTGTCAGCTTGGTTCTGCAC	CCAGCAATCTTCTGAAAACTTCACT
	Chr10-cl KO	AGGACTCCCATGTTGACTCAG	ATGTGCAGTGGAGAGAAATGTGA
	Chr10-cl WT	GAATGAAGACCATGGAAAGAAGCAA	AAAGGCTTTACCACACTTCGAAC
	Chr13.1-cl KO	TGTGTGGGCATCATAAGGCT	CCTTGGCAACTACACAGAGATGT
	Chr13.1-cl WT	GAGGAAAATAAGATCATTGCCCTGG	TGTGTTGAAAGATTTCTTGCCTGG
	Chr13.2-cl KO	ACAAGGTACCTGTACTGCACT	GGACTCGGAAACCTCAGGAC
	Chr13.2-cl WT	ACTGTGGAGGAAGTGACAGG	CACGCATTCAGATGTTAGGCTT
	Chst1-MMETn KO	AATCTGCCCGGAGCTCTCCA	TGACAGGCACAATCACATGCT
	Chst1-MMETn WT	GCTAGTCTTCGGCCTCCTGT	AGAGGGCGACTTGTGATTCT
RT-qPCR primer	Target	FW	RV
	Chst1 mRNA	CTTCTCCACCTGAAGGCCTGA	AACATTGCATGGCTGGGCAC
Cloning primer	Construct	FW	RV
	MMETn-Cd59a with Gm13051 motif and LTR	TCTTACGCGTGCTAGCATATTTTTCGGCTCTGCCTCC	TTGGCGTCTTCCATGGACTTTTCAGATCGCCAGTGACT
	MMETn-Cd59a with LTR only	TCTTACGCGTGCTAGCGAGGAAATGTTGTCTCCCCTC	as above
	Cd59a fragment without MMETn	TCTTACGCGTGCTAGCCTGTGGGTTTGTAAACAGAATTC	as above
Oligos for luciferase reporter assays	Target site	Sequence
	Zfp809_PBS-Pro	CTGGGGGCTCGTCCGGGAT
	Zfp46_L2c	GAGAAGTCAGGGAAGGCTTCTTGTAGGAGGTGGCAT
	Gm13152_RLTR13B1	CAAAGGGGCCCAGAGGGTCTGCGGCA
	Gm30910_MMERGLN	GCAATACTGGCCCTTTTCTTCCTCTGATCTCTATAACTGGAAAGTAAACCACCCCC
	Gm13154_ETnERV2-int	TTACGCCGCAGCAAGGAAAGGGAAGAA
	LOC102_RLTR13D1	GGATCCCACTGAGACAGGAATCTTCTCTACA
	Zfp534_Nonrep	GTTCATGCACACAGTGCCCATCTATGAGGGCTACACCCCACACCA
	AW146154_MurERV4	CACGTAGGGAGAGTGCACCCCATATGAAATCATAGC
	Gm13139_RMER16-int	ACAGTCTCAGTTTGCACAGCAGAAACTGATAAGTTAC
	Zfp599_ORR1B1	CTACACACTGCCATGTTTCCCACCATGATGGTGATGGACTAGGTCTCTGTGAGTCA
	Rex2_MMETn	CTCATGTAGCTTCGGAGAGCTACGGCCTACCGCCTGATACCCAGCTCCTC
	Zfp961_PBS-Lys1,2	AATTGGCGCCCAACGTGGGGC
	Gm13051_MMETn	TATCTATGGCTCTGCCTCCCCTCCCCAAAAGATACTGAGAGCCACAGGTG
	Gm13157_IAPLTR4	CTGCCTGTCCCATGGCGTCATCTGGGCTGATAGTGAGCA
	Zfp617_ORR1A2	TAAGACTTGCATTGGTCATGGTGTCTGTTCACAGCAGTAAAA
	Zfp882_Lx8	ACTTTCTTCAGTGGTGTAGCCACTGGCAAGCTGCCCTTAAGCCAGTCA
	Gm21082_IAPLTR1_Mm	GCTCTGCCTTCCCCGTGACGTCAACTCGGC
	Zfp810_Lx8	ACATTGTGGAAGAGGGGGTGGAAAGACTGTAAGAGCGACATGGGC
	Gm13154_RLTR9E	TATTGTTCTGCCATTGCTGCCGCTGCT
	Zfp661_ORR1D2	TGATTCCCTGTTGGCGACCCTTTGGGGACTCTAGATGGTACAGCCTTGTTGCAGGA
PCR primer to confirm novel ETn insertions	ETn/ETnERV insertion locus	Mouse ID	FW primer target	RV primer target	FW	RV	Seqencing
	chr4:55270434-55270875	T09673	3'flanking region	3'LTR	GCTGGGACCATATCCATACTAACT	CACCCGTGCACCTTTCTACT	Sanger
	chr4:55270434-55270875	T09673	5'flanking region	5'LTR	GGCACTTCACACCACAGCTT	CCCGATTCCCGCCGAATAATCT	Sanger
	chr5:115051089-115051470	T09674	3'LTR	3'flanking region	GGTGGAGCTTCCTGCTCATT	AGGTGGAGAGGCACGGTTAGA	Sanger
	chr5:115051089-115051470	T09674	5'flanking region	5'LTR	AGGGACATGGGTTTCAGACT	CCCGATTCCCGCCGAATAATCT	Sanger
	chr5:115051089-115051470	T09674	5'flanking region	Internal region	AGGGACATGGGTTTCAGACT	GGTAAACTGTATCTGGCTTAAGACT	Sanger and Illumina assembly
	chr5:115051089-115051470	T09674	Internal region	3'flanking region	GTCAAACTTAGCCAGAGTTCCAAC	AGGTGGAGAGGCACGGTTAGA	Sanger
	chr9:107347037-107347533	T09673	5'flanking region	Internal region	CAACTGCAAACACTAATACCGCT	TGGGTGAGAGCAAGGATTTAAGGT	Sanger
	chr9:107347037-107347533	T09673	5'LTR	5'flanking region	CCCGATTCCCGCCGAATAATCT	CAACTGCAAACACTAATACCGCT	Sanger
	chr9:107347037-107347533	T09673	3'flanking region	Internal region	ACCTGACTCCTCCCTCACTAAC	GGAGCTCCACAGGAAAGGAT	Sanger and Illumina assembly
	chrX:54767329-54768003	T09673	3'flanking region	3'LTR	ATTATGCCAGCCCTGCACTC	CACCCGTGCACCTTTCTACT	Sanger
	chrX:54767329-54768003	T09673	5'flanking region	5'LTR	GCTATGCAGTATGCTCTCGGTT	AGTAGAAAGGTGCACGGGTG	Sanger
	chrX:54767329-54768003	T09673	Internal region	5'flanking region	AAAGGAAAAAGTTGGCCTGAGG	GCTATGCAGTATGCTCTCGGTT	Sanger and Illumina assembly
	chrX:54767329-54768003	T09673	Internal region	3'flanking region	GTCAAACTTAGCCAGAGTTCCAAC	ATTATGCCAGCCCTGCACTC	Sanger
	chr8:10770420-10771111	T00436	3'LTR	3'flanking region	CTACATTCTTTTCTCTCGCCACCT	TCCCTCCCGGAATCTGTTCT	Sanger
