# Supplementary material for: KRAB-zinc finger protein gene expansion in response to active retrotransposons in the murine lineage
Source: eLife. 2020 Jun 1;9:e56337. doi: 10.7554/eLife.56337 (PMC7289599; doi:10.7554/eLife.56337)
Supplement: Supplementary file 4. [file elife-56337-supp4.xlsx]

## Sheet: KRAB-ZFP ChIP-seq
KRAB-ZFP	Library construction	Sequencing mode	Read trimming	Mapping	Peak calling stringency	MACS14 settings	Input/Control ChIP
2610305D13Rik	DNA SMART (Takara)	Illumina SR-50	First 3 of R1	Bowtie (--best)	Medium	p-value < 1e-10, enrichment > 10	F9_Input + FLAG_control
AW146154	DNA SMART (Takara)	Illumina SR-50	First 3 of R1	Bowtie (--best)	High	p-value < 1e-10, enrichment > 20	F9_Input + HA_control
EtOHi1	DNA SMART (Takara)	Illumina PE-50	First 3 of R1, last 1 of R1 and R2	Bowtie2	Medium	p-value < 1e-10, enrichment > 10	Gm14296_control
Gm13051	DNA SMART (Takara)	Illumina SR-50	First 3 of R1	Bowtie (--best)	High	p-value < 1e-10, enrichment > 20	F9_Input + FLAG_control
Gm13139	DNA SMART (Takara)	Illumina SR-50	First 3 of R1	Bowtie (--best)	High	p-value < 1e-10, enrichment > 20	F9_Input + HA_control
Gm13145	DNA SMART (Takara)	Illumina SR-50	First 3 of R1	Bowtie (--best)	High	p-value < 1e-10, enrichment > 20	F9_Input + HA_control
Gm13150	DNA SMART (Takara)	Illumina SR-50	First 3 of R1	Bowtie (--best)	High	p-value < 1e-10, enrichment > 20	F9_Input + HA_control
Gm13152	DNA SMART (Takara)	Illumina SR-50	First 3 of R1	Bowtie (--best)	High	p-value < 1e-10, enrichment > 20	F9_Input + FLAG_control
Gm13154	DNA SMART (Takara)	Illumina SR-50	First 3 of R1	Bowtie (--best)	High	p-value < 1e-10, enrichment > 20	F9_Input + FLAG_control
Gm13157	DNA SMART (Takara)	Illumina SR-50	First 3 of R1	Bowtie (--best)	High	p-value < 1e-10, enrichment > 20	F9_Input + FLAG_control
Gm13212	DNA SMART (Takara)	Illumina SR-50	First 3 of R1	Bowtie (--best)	Low	p-value < 1e-5, enrichment > 10	F9_Input + FLAG_control
Gm13225	DNA SMART (Takara)	Illumina SR-50	First 3 of R1	Bowtie (--best)	Medium	p-value < 1e-10, enrichment > 10	F9_Input + FLAG_control
Gm13235	DNA SMART (Takara)	Illumina SR-50	First 3 of R1	Bowtie (--best)	Low	p-value < 1e-5, enrichment > 10	F9_Input + HA_control
Gm13247	DNA SMART (Takara)	Illumina SR-50	First 3 of R1	Bowtie (--best)	Low	p-value < 1e-5, enrichment > 10	F9_Input + FLAG_control
Gm13251	DNA SMART (Takara)	Illumina SR-50	First 3 of R1	Bowtie (--best)	High	p-value < 1e-10, enrichment > 20	F9_Input + FLAG_control
Gm14295	Illumina adapters	Illumina SR-100	None	Bowtie (--best)	Low	p-value < 1e-5	TI_443_Input
Gm14326	DNA SMART (Takara)	Illumina PE-50	First 3 of R1, last 1 of R1 and R2	Bowtie2	Low	p-value < 1e-5, enrichment > 10	Gm14296_control
Gm14391	DNA SMART (Takara)	Illumina PE-50	First 3 of R1, last 1 of R1 and R2	Bowtie2	Low	p-value < 1e-5, enrichment > 10	Gm14296_control
Gm14393	DNA SMART (Takara)	Illumina PE-50	First 3 of R1, last 1 of R1 and R2	Bowtie2	Low	p-value < 1e-5, enrichment > 10	Gm14296_control
Gm14399	Illumina adapters	Illumina SR-100	None	Bowtie (--best)	Low	p-value < 1e-5	TI_399_Input
Gm14401	Illumina adapters	Illumina SR-100	None	Bowtie (--best)	High	p-value < 1e-5	TI_399_Input
Gm14406	DNA SMART (Takara)	Illumina PE-50	First 3 of R1, last 1 of R1 and R2	Bowtie2	High	p-value < 1e-10, enrichment > 20	Gm14296_control
Gm14410	DNA SMART (Takara)	Illumina PE-50	First 3 of R1, last 1 of R1 and R2	Bowtie2	Medium	p-value < 1e-10, enrichment > 10	Gm14296_control
Gm14412	DNA SMART (Takara)	Illumina PE-50	First 3 of R1, last 1 of R1 and R2	Bowtie2	High	p-value < 1e-10, enrichment > 20	Gm14296_control
Gm14418	DNA SMART (Takara)	Illumina PE-50	First 3 of R1, last 1 of R1 and R2	Bowtie2	Low	p-value < 1e-5, enrichment > 10	Gm14296_control
Gm14419	Illumina adapters	Illumina SR-100	None	Bowtie (--best)	High	p-value < 1e-5	TI_399_Input
Gm14420	Illumina adapters	Illumina SR-100	None	Bowtie (--best)	Medium	p-value < 1e-5	TI_399_Input
Gm14436	DNA SMART (Takara)	Illumina PE-50	First 3 of R1, last 1 of R1 and R2	Bowtie2	Medium	p-value < 1e-10, enrichment > 10	Gm14296_control
Gm14443	Illumina adapters	Illumina SR-100	None	Bowtie (--best)	Medium	p-value < 1e-5	TI_443_Input
Gm21082	DNA SMART (Takara)	Illumina SR-50	First 3 of R1	Bowtie (--best)	High	p-value < 1e-10, enrichment > 20	F9_Input + FLAG_control
Gm30910	DNA SMART (Takara)	Illumina SR-50	First 3 of R1	Bowtie (--best)	High	p-value < 1e-10, enrichment > 20	F9_Input + FLAG_control
Gm4631	Illumina adapters	Illumina SR-100	None	Bowtie (--best)	Low	p-value < 1e-5	TI_399_Input
Gm6710	DNA SMART (Takara)	Illumina PE-50	First 3 of R1, last 1 of R1 and R2	Bowtie2	High	p-value < 1e-10, enrichment > 20	Gm14296_control
Gm8898	Illumina adapters	Illumina SR-100	None	Bowtie (--best)	High	p-value < 1e-5	TI_399_Input
LOC102638055	DNA SMART (Takara)	Illumina SR-50	First 3 of R1	Bowtie (--best)	High	p-value < 1e-10, enrichment > 20	F9_Input + FLAG_control
Rex2	DNA SMART (Takara)	Illumina SR-50	First 3 of R1	Bowtie (--best)	High	p-value < 1e-10, enrichment > 20	F9_Input + HA_control
Zfp273	DNA SMART (Takara)	Illumina SR-50	First 3 of R1	Bowtie (--best)	High	p-value < 1e-10, enrichment > 20	F9_Input + HA_control
Zfp429	DNA SMART (Takara)	Illumina SR-50	First 3 of R1	Bowtie (--best)	High	p-value < 1e-10, enrichment > 20	F9_Input + HA_control
Zfp456	DNA SMART (Takara)	Illumina SR-50	First 3 of R1	Bowtie (--best)	Medium	p-value < 1e-10, enrichment > 10	F9_Input + HA_control
Zfp457	DNA SMART (Takara)	Illumina SR-50	First 3 of R1	Bowtie (--best)	Low	p-value < 1e-5, enrichment > 10	F9_Input + HA_control
Zfp458	DNA SMART (Takara)	Illumina SR-50	First 3 of R1	Bowtie (--best)	Low	p-value < 1e-5, enrichment > 10	F9_Input + HA_control
Zfp46	DNA SMART (Takara)	Illumina SR-50	First 3 of R1	Bowtie (--best)	High	p-value < 1e-10, enrichment > 20	F9_Input + FLAG_control
Zfp493	DNA SMART (Takara)	Illumina SR-50	First 3 of R1	Bowtie (--best)	Medium	p-value < 1e-10, enrichment > 10	F9_Input + HA_control
Zfp534	DNA SMART (Takara)	Illumina SR-50	First 3 of R1	Bowtie (--best)	Medium	p-value < 1e-10, enrichment > 10	F9_Input + FLAG_control
Zfp58	DNA SMART (Takara)	Illumina SR-50	First 3 of R1	Bowtie (--best)	High	p-value < 1e-10, enrichment > 20	F9_Input + HA_control
Zfp595	DNA SMART (Takara)	Illumina SR-50	First 3 of R1	Bowtie (--best)	Medium	p-value < 1e-10, enrichment > 10	F9_Input + HA_control
Zfp599	DNA SMART (Takara)	Illumina SR-50	First 3 of R1	Bowtie (--best)	High	p-value < 1e-10, enrichment > 20	F9_Input + HA_control
Zfp600	DNA SMART (Takara)	Illumina SR-50	First 3 of R1	Bowtie (--best)	Low	p-value < 1e-5, enrichment > 10	F9_Input + HA_control
Zfp617	DNA SMART (Takara)	Illumina SR-50	First 3 of R1	Bowtie (--best)	High	p-value < 1e-10, enrichment > 20	F9_Input + FLAG_control
Zfp661	DNA SMART (Takara)	Illumina SR-50	First 3 of R1	Bowtie (--best)	High	p-value < 1e-10, enrichment > 20	F9_Input + HA_control
Zfp709	DNA SMART (Takara)	Illumina SR-50	First 3 of R1	Bowtie (--best)	Low	p-value < 1e-5, enrichment > 10	F9_Input + HA_control
Zfp712	DNA SMART (Takara)	Illumina SR-50	First 3 of R1	Bowtie (--best)	High	p-value < 1e-10, enrichment > 20	F9_Input + HA_control
Zfp738	DNA SMART (Takara)	Illumina SR-50	First 3 of R1	Bowtie (--best)	High	p-value < 1e-10, enrichment > 20	F9_Input + HA_control
Zfp759	DNA SMART (Takara)	Illumina SR-50	First 3 of R1	Bowtie (--best)	High	p-value < 1e-10, enrichment > 20	F9_Input + HA_control
Zfp808	DNA SMART (Takara)	Illumina SR-50	First 3 of R1	Bowtie (--best)	High	p-value < 1e-10, enrichment > 20	F9_Input + HA_control
Zfp810	DNA SMART (Takara)	Illumina SR-50	First 3 of R1	Bowtie (--best)	High	p-value < 1e-10, enrichment > 20	F9_Input + FLAG_control
Zfp872	DNA SMART (Takara)	Illumina SR-50	First 3 of R1	Bowtie (--best)	High	p-value < 1e-10, enrichment > 20	F9_Input + HA_control
Zfp874a	DNA SMART (Takara)	Illumina SR-50	First 3 of R1	Bowtie (--best)	High	p-value < 1e-10, enrichment > 20	F9_Input + HA_control
Zfp874b	DNA SMART (Takara)	Illumina SR-50	First 3 of R1	Bowtie (--best)	High	p-value < 1e-10, enrichment > 20	F9_Input + HA_control
Zfp882	DNA SMART (Takara)	Illumina SR-50	First 3 of R1	Bowtie (--best)	Medium	p-value < 1e-10, enrichment > 10	F9_Input + FLAG_control
Zfp931	Illumina adapters	Illumina SR-100	None	Bowtie (--best)	Low	p-value < 1e-5	TI_443_Input
Zfp933	DNA SMART (Takara)	Illumina SR-50	First 3 of R1	Bowtie (--best)	Low	p-value < 1e-5, enrichment > 10	F9_Input + HA_control
Zfp935	DNA SMART (Takara)	Illumina SR-50	First 3 of R1	Bowtie (--best)	Medium	p-value < 1e-10, enrichment > 10	F9_Input + HA_control
Zfp938	DNA SMART (Takara)	Illumina SR-50	First 3 of R1	Bowtie (--best)	High	p-value < 1e-10, enrichment > 20	F9_Input + HA_control
Zfp94	DNA SMART (Takara)	Illumina SR-50	First 3 of R1	Bowtie (--best)	High	p-value < 1e-10, enrichment > 20	F9_Input + HA_control
Zfp953	DNA SMART (Takara)	Illumina SR-50	First 3 of R1	Bowtie (--best)	High	p-value < 1e-10, enrichment > 20	F9_Input + HA_control
Zfp961	DNA SMART (Takara)	Illumina SR-50	First 3 of R1	Bowtie (--best)	High	p-value < 1e-10, enrichment > 20	F9_Input + FLAG_control
Zkscan17	DNA SMART (Takara)	Illumina SR-50	First 3 of R1	Bowtie (--best)	Low	p-value < 1e-5, enrichment > 10	F9_Input + HA_control

## Sheet: RNA-seq
Cell line	RNA purification	Library construction	Sequencing mode
Chr4-cl WT B6/129 ES cells #26	Trizol + RNeasy column	SureSelect (Agilent)	Illumina PE-50
Chr4-cl WT B6/129 ES cells #49	Trizol + RNeasy column	SureSelect (Agilent)	Illumina PE-50
Chr4-cl KO B6/129 ES cells #6	Trizol + RNeasy column	SureSelect (Agilent)	Illumina PE-50
Chr4-cl KO B6/129 ES cells #41	Trizol + RNeasy column	SureSelect (Agilent)	Illumina PE-50
Chr4-cl WT B6 ES cells #14	Trizol + RNeasy column	SureSelect (Agilent)	Illumina PE-50
Chr4-cl WT B6 ES cells #16	Trizol + RNeasy column	SureSelect (Agilent)	Illumina PE-50
Chr4-cl KO B6 ES cells #1	Trizol + RNeasy column	SureSelect (Agilent)	Illumina PE-50
Chr4-cl KO B6 ES cells #8	Trizol + RNeasy column	SureSelect (Agilent)	Illumina PE-50
Chr10-cl WT B6 ES cells #25	Trizol + RNeasy column	SureSelect (Agilent)	Illumina PE-50
Chr10-cl WT B6 ES cells #46	Trizol + RNeasy column	SureSelect (Agilent)	Illumina PE-50
Chr10-cl KO B6 ES cells #34	Trizol + RNeasy column	SureSelect (Agilent)	Illumina PE-50
Chr10-cl KO B6 ES cells #76	Trizol + RNeasy column	SureSelect (Agilent)	Illumina PE-50
Chr13.1-cl WT B6 ES cells #7	Trizol + RNeasy column	SureSelect (Agilent)	Illumina PE-50
Chr13.1-cl WT B6 ES cells #10	Trizol + RNeasy column	SureSelect (Agilent)	Illumina PE-50
Chr13.1-cl KO B6 ES cells #14	Trizol + RNeasy column	SureSelect (Agilent)	Illumina PE-50
Chr13.1-cl KO B6 ES cells #65	Trizol + RNeasy column	SureSelect (Agilent)	Illumina PE-50
Chr13.2-cl WT B6 ES cells #18	Trizol + RNeasy column	SureSelect (Agilent)	Illumina PE-50
Chr13.2-cl WT B6 ES cells #69	Trizol + RNeasy column	SureSelect (Agilent)	Illumina PE-50
Chr13.2-cl KO B6 ES cells #80	Trizol + RNeasy column	SureSelect (Agilent)	Illumina PE-50
Chr13.2-cl KO B6 ES cells #90	Trizol + RNeasy column	SureSelect (Agilent)	Illumina PE-50
Chr4-cl WT B6 liver #T2602 (4 weeks)	Trizol + RNeasy column	TruSeq (Illumina)	Illumina PE-50
Chr4-cl WT B6 liver #T00833 (4 weeks)	Trizol + RNeasy column	TruSeq (Illumina)	Illumina PE-50
Chr4-cl WT B6 liver #T2596 (4 weeks)	Trizol + RNeasy column	TruSeq (Illumina)	Illumina PE-50
Chr4-cl KO B6 liver #T2601 (4 weeks)	Trizol + RNeasy column	TruSeq (Illumina)	Illumina PE-50
Chr4-cl KO B6 liver #T00834 (4 weeks)	Trizol + RNeasy column	TruSeq (Illumina)	Illumina PE-50
Chr4-cl KO B6 liver #T2597 (4 weeks)	Trizol + RNeasy column	TruSeq (Illumina)	Illumina PE-50
Chr4-cl WT B6 testis #T2602 (4 weeks)	Trizol + RNeasy column	TruSeq (Illumina)	Illumina PE-50
Chr4-cl WT B6 testis #T00833 (4 weeks)	Trizol + RNeasy column	TruSeq (Illumina)	Illumina PE-50
Chr4-cl KO B6 testis #T2601 (4 weeks)	Trizol + RNeasy column	TruSeq (Illumina)	Illumina PE-50
Chr4-cl KO B6 testis #T00834 (4 weeks)	Trizol + RNeasy column	TruSeq (Illumina)	Illumina PE-50
Chr4-cl KO B6 testis #T00835 (4 weeks)	Trizol + RNeasy column	TruSeq (Illumina)	Illumina PE-50
Chr4-cl WT B6 brain #T2602 (4 weeks)	Trizol + RNeasy column	TruSeq (Illumina)	Illumina PE-50
Chr4-cl WT B6 brain #T2596 (4 weeks)	Trizol + RNeasy column	TruSeq (Illumina)	Illumina PE-50
Chr4-cl KO B6 brain #T2601 (4 weeks)	Trizol + RNeasy column	TruSeq (Illumina)	Illumina PE-50
Chr4-cl KO B6 brain #T2597 (4 weeks)	Trizol + RNeasy column	TruSeq (Illumina)	Illumina PE-50
Chr4-cl WT B6 kidney #T2602 (4 weeks)	Trizol + RNeasy column	TruSeq (Illumina)	Illumina PE-50
Chr4-cl WT B6 kidney #T2596 (4 weeks)	Trizol + RNeasy column	TruSeq (Illumina)	Illumina PE-50
Chr4-cl KO B6 kidney #T2601 (4 weeks)	Trizol + RNeasy column	TruSeq (Illumina)	Illumina PE-50
Chr4-cl KO B6 kidney #T2597 (4 weeks)	Trizol + RNeasy column	TruSeq (Illumina)	Illumina PE-50
Chr4-cl WT B6 blood #T00414 (20 weeks)	Trizol + RNeasy column	TruSeq (Illumina)	Illumina PE-50
Chr4-cl WT B6 blood #T00525 (20 weeks)	Trizol + RNeasy column	TruSeq (Illumina)	Illumina PE-50
Chr4-cl KO B6 blood #T00415 (20 weeks)	Trizol + RNeasy column	TruSeq (Illumina)	Illumina PE-50
Chr4-cl KO B6 blood #T00524 (20 weeks)	Trizol + RNeasy column	TruSeq (Illumina)	Illumina PE-50
Chr2-cl WT B6 ES cells #A8	High Pure RNA isolation Kit (Roche)	TruSeq (Illumina)	Illumina PE-100
Chr2-cl WT B6 ES cells #E6	High Pure RNA isolation Kit (Roche)	TruSeq (Illumina)	Illumina PE-100
Chr2-cl WT B6 ES cells #H7	High Pure RNA isolation Kit (Roche)	TruSeq (Illumina)	Illumina PE-100
Chr2-cl KO B6 ES cells #B10	High Pure RNA isolation Kit (Roche)	TruSeq (Illumina)	Illumina PE-100
Chr2-cl KO B6 ES cells #D10	High Pure RNA isolation Kit (Roche)	TruSeq (Illumina)	Illumina PE-100
Chr2-cl KO B6 ES cells #G11	High Pure RNA isolation Kit (Roche)	TruSeq (Illumina)	Illumina PE-100
Chr2-cl WT B6/129 testis #C4673 (16 weeks)	Trizol + RNeasy column	TruSeq (Illumina)	Illumina PE-100
Chr2-cl WT B6/129 testis #C4694 (16 weeks)	Trizol + RNeasy column	TruSeq (Illumina)	Illumina PE-100
Chr2-cl KO B6/129 testis #C4693 (16 weeks)	Trizol + RNeasy column	TruSeq (Illumina)	Illumina PE-100
Chr2-cl KO B6/129 testis #C4695 (16 weeks)	Trizol + RNeasy column	TruSeq (Illumina)	Illumina PE-100
Chr2-cl WT B6/129 brain #C4673 (16 weeks)	Trizol + RNeasy column	TruSeq (Illumina)	Illumina PE-100
Chr2-cl WT B6/129 brain #C4694 (16 weeks)	Trizol + RNeasy column	TruSeq (Illumina)	Illumina PE-100
Chr2-cl KO B6/129 brain #C4693 (16 weeks)	Trizol + RNeasy column	TruSeq (Illumina)	Illumina PE-100
Chr2-cl KO B6/129 brain #C4695 (16 weeks)	Trizol + RNeasy column	TruSeq (Illumina)	Illumina PE-100
Chr2-cl WT B6/129 blood #C4673 (20 weeks)	Trizol + RNeasy column	TruSeq (Illumina)	Illumina PE-100
Chr2-cl WT B6/129 blood #C4694 (20 weeks)	Trizol + RNeasy column	TruSeq (Illumina)	Illumina PE-100
Chr2-cl KO B6/129 blood #C4693 (20 weeks)	Trizol + RNeasy column	TruSeq (Illumina)	Illumina PE-100
Chr2-cl KO B6/129 blood #C4672 (20 weeks)	Trizol + RNeasy column	TruSeq (Illumina)	Illumina PE-100

## Sheet: Histone and KAP1 ChIP-seq
Cell line	Antibody	ChIP	Library preparation	Sequencing mode	Mapping
Chr4-cl WT B6/129 ES cells #26	H3K9me3 (Active Motif #39161)	Native ChIP	DNA SMART (Takara)	Illumina SR-50	Bowtie (--best)
Chr4-cl WT B6/129 ES cells #49	H3K9me3 (Active Motif #39161)	Native ChIP	DNA SMART (Takara)	Illumina SR-50	Bowtie (--best)
Chr4-cl KO B6/129 ES cells #6	H3K9me3 (Active Motif #39161)	Native ChIP	DNA SMART (Takara)	Illumina SR-50	Bowtie (--best)
Chr4-cl KO B6/129 ES cells #41	H3K9me3 (Active Motif #39161)	Native ChIP	DNA SMART (Takara)	Illumina SR-50	Bowtie (--best)
Chr10-cl WT B6 ES cells #25	H3K9me3 (Active Motif #39161)	Native ChIP	DNA SMART (Takara)	Illumina SR-50	Bowtie (--best)
Chr10-cl WT B6 ES cells #46	H3K9me3 (Active Motif #39161)	Native ChIP	DNA SMART (Takara)	Illumina SR-50	Bowtie (--best)
Chr10-cl KO B6 ES cells #34	H3K9me3 (Active Motif #39161)	Native ChIP	DNA SMART (Takara)	Illumina SR-50	Bowtie (--best)
Chr10-cl KO B6 ES cells #76	H3K9me3 (Active Motif #39161)	Native ChIP	DNA SMART (Takara)	Illumina SR-50	Bowtie (--best)
Chr13.1-cl WT B6 ES cells #7	H3K9me3 (Active Motif #39161)	Native ChIP	DNA SMART (Takara)	Illumina SR-50	Bowtie (--best)
Chr13.1-cl WT B6 ES cells #10	H3K9me3 (Active Motif #39161)	Native ChIP	DNA SMART (Takara)	Illumina SR-50	Bowtie (--best)
Chr13.1-cl KO B6 ES cells #14	H3K9me3 (Active Motif #39161)	Native ChIP	DNA SMART (Takara)	Illumina SR-50	Bowtie (--best)
Chr13.1-cl KO B6 ES cells #65	H3K9me3 (Active Motif #39161)	Native ChIP	DNA SMART (Takara)	Illumina SR-50	Bowtie (--best)
Chr13.2-cl KO B6 ES cells #80	H3K9me3 (Active Motif #39161)	Native ChIP	DNA SMART (Takara)	Illumina SR-50	Bowtie (--best)
Chr13.2-cl KO B6 ES cells #90	H3K9me3 (Active Motif #39161)	Native ChIP	DNA SMART (Takara)	Illumina SR-50	Bowtie (--best)
Chr2-cl WT B6 ES cells #A8	H3K9me3 (Diagenode, C15410056)	ChIP (Ecco et al. 2016)	TruSeq (Illumina)	Illumina PE-79	Bowtie2
Chr2-cl WT B6 ES cells #E6	H3K9me3 (Diagenode, C15410056)	ChIP (Ecco et al. 2016)	TruSeq (Illumina)	Illumina PE-79	Bowtie2
Chr2-cl WT B6 ES cells #H7	H3K9me3 (Diagenode, C15410056)	ChIP (Ecco et al. 2016)	TruSeq (Illumina)	Illumina PE-79	Bowtie2
Chr2-cl KO B6 ES cells #B10	H3K9me3 (Diagenode, C15410056)	ChIP (Ecco et al. 2016)	TruSeq (Illumina)	Illumina PE-79	Bowtie2
Chr2-cl KO B6 ES cells #D10	H3K9me3 (Diagenode, C15410056)	ChIP (Ecco et al. 2016)	TruSeq (Illumina)	Illumina PE-79	Bowtie2
Chr2-cl KO B6 ES cells #G11	H3K9me3 (Diagenode, C15410056)	ChIP (Ecco et al. 2016)	TruSeq (Illumina)	Illumina PE-79	Bowtie2
Chr2-cl WT B6 ES cells #A8	KAP1 (Tronolab, rabbit polyclonal S23470)	ChIP (Ecco et al. 2016)	TruSeq (Illumina)	Illumina PE-79	Bowtie2
Chr2-cl WT B6 ES cells #E6	KAP1 (Tronolab, rabbit polyclonal S23470)	ChIP (Ecco et al. 2016)	TruSeq (Illumina)	Illumina PE-79	Bowtie2
Chr2-cl WT B6 ES cells #H7	KAP1 (Tronolab, rabbit polyclonal S23470)	ChIP (Ecco et al. 2016)	TruSeq (Illumina)	Illumina PE-79	Bowtie2
Chr2-cl KO B6 ES cells #B10	KAP1 (Tronolab, rabbit polyclonal S23470)	ChIP (Ecco et al. 2016)	TruSeq (Illumina)	Illumina PE-79	Bowtie2
Chr2-cl KO B6 ES cells #D10	KAP1 (Tronolab, rabbit polyclonal S23470)	ChIP (Ecco et al. 2016)	TruSeq (Illumina)	Illumina PE-79	Bowtie2
Chr2-cl KO B6 ES cells #G11	KAP1 (Tronolab, rabbit polyclonal S23470)	ChIP (Ecco et al. 2016)	TruSeq (Illumina)	Illumina PE-79	Bowtie2
Chr4-cl WT B6/129 ES cells #26 [KAP1-GFP]	GFP (#A-11122)	ChIP (O'Geen et al. 2010)	DNA SMART (Takara)	Illumina SR-50	Bowtie (--best)
Chr4-cl KO B6/129 ES cells #6 [KAP1-GFP]	GFP (#A-11122)	ChIP (O'Geen et al. 2010)	DNA SMART (Takara)	Illumina SR-50	Bowtie (--best)
Chr4-cl WT B6/129 ES cells #26	H3K4me1 (ab8895)	ChIP (O'Geen et al. 2010)	DNA SMART (Takara)	Illumina SR-50	Bowtie (--best)
Chr4-cl WT B6/129 ES cells #26	H3K4me3 (ab8580)	ChIP (O'Geen et al. 2010)	DNA SMART (Takara)	Illumina SR-50	Bowtie (--best)
Chr4-cl WT B6/129 ES cells #26	H3K27ac (ab4729)	ChIP (O'Geen et al. 2010)	DNA SMART (Takara)	Illumina SR-50	Bowtie (--best)
Chr4-cl KO B6/129 ES cells #6	H3K4me1 (ab8895)	ChIP (O'Geen et al. 2010)	DNA SMART (Takara)	Illumina SR-50	Bowtie (--best)
Chr4-cl KO B6/129 ES cells #6	H3K4me3 (ab8580)	ChIP (O'Geen et al. 2010)	DNA SMART (Takara)	Illumina SR-50	Bowtie (--best)
Chr4-cl KO B6/129 ES cells #6	H3K27ac (ab4729)	ChIP (O'Geen et al. 2010)	DNA SMART (Takara)	Illumina SR-50	Bowtie (--best)
Chr4-cl WT B6 testis (2 weeks)	H3K4me1 (ab8895)	ChIP (Khil et al. 2012)	DNA SMART (Takara)	Illumina SR-50	Bowtie (--best)
Chr4-cl WT B6 testis (2 weeks)	H3K4me3 (ab8580)	ChIP (Khil et al. 2012)	DNA SMART (Takara)	Illumina SR-50	Bowtie (--best)
Chr4-cl WT B6 testis (2 weeks)	H3K27ac (ab4729)	ChIP (Khil et al. 2012)	DNA SMART (Takara)	Illumina SR-50	Bowtie (--best)
Chr4-cl KO B6 testis (2 weeks)	H3K4me1 (ab8895)	ChIP (Khil et al. 2012)	DNA SMART (Takara)	Illumina SR-50	Bowtie (--best)
Chr4-cl KO B6 testis (2 weeks)	H3K4me3 (ab8580)	ChIP (Khil et al. 2012)	DNA SMART (Takara)	Illumina SR-50	Bowtie (--best)
Chr4-cl KO B6 testis (2 weeks)	H3K27ac (ab4729)	ChIP (Khil et al. 2012)	DNA SMART (Takara)	Illumina SR-50	Bowtie (--best)
Chr4-cl WT B6/129 ES cells #26	n/a (Input)	Native ChIP	DNA SMART (Takara)	Illumina SR-50	Bowtie (--best)
Chr4-cl WT B6/129 ES cells #49	n/a (Input)	Native ChIP	DNA SMART (Takara)	Illumina SR-50	Bowtie (--best)
Chr4-cl KO B6/129 ES cells #6	n/a (Input)	Native ChIP	DNA SMART (Takara)	Illumina SR-50	Bowtie (--best)
Chr4-cl KO B6/129 ES cells #41	n/a (Input)	Native ChIP	DNA SMART (Takara)	Illumina SR-50	Bowtie (--best)
Chr4-cl WT B6 testis (2 weeks)	n/a (Input)	ChIP (Khil et al. 2012)	DNA SMART (Takara)	Illumina SR-50	Bowtie (--best)
Chr4-cl KO B6 testis (2 weeks)	n/a (Input)	ChIP (Khil et al. 2012)	DNA SMART (Takara)	Illumina SR-50	Bowtie (--best)
Chr2-cl WT B6 ES cells #A8	n/a (Input)	ChIP (Ecco et al. 2016)	TruSeq (Illumina)	Illumina PE-79	Bowtie2
Chr2-cl WT B6 ES cells #E6	n/a (Input)	ChIP (Ecco et al. 2016)	TruSeq (Illumina)	Illumina PE-79	Bowtie2
Chr2-cl WT B6 ES cells #H7	n/a (Input)	ChIP (Ecco et al. 2016)	TruSeq (Illumina)	Illumina PE-79	Bowtie2
Chr2-cl KO B6 ES cells #B10	n/a (Input)	ChIP (Ecco et al. 2016)	TruSeq (Illumina)	Illumina PE-79	Bowtie2
Chr2-cl KO B6 ES cells #D10	n/a (Input)	ChIP (Ecco et al. 2016)	TruSeq (Illumina)	Illumina PE-79	Bowtie2
Chr2-cl KO B6 ES cells #G11	n/a (Input)	ChIP (Ecco et al. 2016)	TruSeq (Illumina)	Illumina PE-79	Bowtie2
Chr4-cl WT B6/129 ES cells #26	n/a (Input)	ChIP (O'Geen et al.)	DNA SMART (Takara)	Illumina SR-50	Bowtie (--best)
Chr4-cl KO B6/129 ES cells #6	n/a (Input)	ChIP (O'Geen et al.)	DNA SMART (Takara)	Illumina SR-50	Bowtie (--best)

## Sheet: Capture-seq
Sample	Tag	Sex	Cluster KO	Strain background	Genotype	Type	Used to identifiy Etn insertions	gDNA source	Unique ETn-capture reads	Unique MuLV-capture reads	Sequenced Parents/Grandparents
QXT1	T00431	F	Chr4	B6	KO/KO (F3)	offspring (1)	yes	tail	855585	34218	T2379 x T2680 and T2613 x T2682 (B6 F1 KO x KO)
QXT2	T00460	M	Chr4	B6	KO/KO (F3)	offspring (1)	yes	tail	1046650	42443	T2379 x T2680 and T2613 x T2682 (B6 F1 KO x KO)
QXT3	T09655	F	Chr4	B6	WT	Mice without ancestor control	yes	blood	904925	34950	n/a
QXT4	T09656	F	Chr4	B6	WT	Mice without ancestor control	yes	blood	891588	33897	n/a
QXT5	T09673	F	Chr4	B6x129X1/SvJ (F1)	KO/KO	offspring (2)	yes	blood	902477	30018	T3913 x T3921 (B6/129 het x het)
QXT6	T09674	F	Chr4	B6x129X1/SvJ (F1)	KO/KO	offspring (2)	yes	blood	858260	29770	T3913 x T3921 (B6/129 het x het)
QXT7	T09691	M	Chr4	B6	KO/KO (F4)	offspring (1)	yes	blood	869656	34702	T00460 x T00431/T00432 (B6 F3 KO x KO)
QXT8	T09692	M	Chr4	B6	KO/KO (F4)	offspring (1)	yes	blood	901626	36814	T00460 x T00431/T00432 (B6 F3 KO x KO)
QXT9	T2379	F	Chr4	B6	KO/KO	ancestors (1)	yes	tail	525419	14140	n/a
QXT10	T2613	F	Chr4	B6	KO/KO	ancestors (1)	yes	ear	807319	30027	n/a
QXT11	T3913	F	Chr4	B6x129X1/SvJ (F1)	KO/WT	ancestors (2)	yes	ear	794403	28519	n/a
QXT12	T3921	M	Chr4	B6x129X1/SvJ (F1)	KO/WT	ancestors (2)	yes	tail	843558	32645	n/a
QXT13	T00432	F	Chr4	B6	KO/KO (F3)	offspring (1)	yes	tail	834918	31818	T2379 x T2680 and T2613 x T2682 (B6 F1 KO x KO)
QXT14	T09693	M	Chr4	B6	KO/KO (F4)	offspring (1)	yes	ear	657824	23980	T00460 x T00431/T00432 (B6 F3 KO x KO)
QXT15	T09694	M	Chr4	B6	KO/KO (F4)	offspring (1)	yes	ear	665619	27322	T00460 x T00431/T00432 (B6 F3 KO x KO)
QXT16	T09695	M	Chr4	B6	KO/KO (F4)	offspring (1)	yes	ear	780171	30686	T00460 x T00431/T00432 (B6 F3 KO x KO)
QXT17	T2680	M	Chr4	B6	KO/KO	ancestors (1)	yes	spleen	799831	32757	n/a
QXT18	T2682	M	Chr4	B6	KO/KO	ancestors (1)	yes	spleen	817343	33402	n/a
QXT19	B6 #2	n/a	Chr4	B6	KO/WT	B6 ES cell lines for cloning	yes	ES cells	790448	33961	n/a
QXT20	B6 #11	n/a	Chr4	B6	KO/WT	B6 ES cell lines for cloning	yes	ES cells	813792	35394	n/a
QXT21	T00436	F	Chr4	B6x129X1/SvJ (F1)	KO/KO	offspring (2)	yes	tail	752695	26847	T3913 x T3921 (B6/129 het x het)
QXT28	T00434	F	Chr4	B6x129X1/SvJ (F1)	WT	offspring (2)	yes	tail	736796	24737	T3913 x T3921 (B6/129 het x het)
QXT29	T00435	F	Chr4	B6x129X1/SvJ (F1)	WT	offspring (2)	yes	tail	757345	23969	T3913 x T3921 (B6/129 het x het)
QXT30	T00464	M	Chr4	B6x129X1/SvJ (F1)	WT	offspring (2)	yes	tail	693512	24468	T3913 x T3921 (B6/129 het x het)
QXT45	T00869	M	Chr4	B6x129X1/SvJ (F1)	KO/KO	offspring (2)	yes	ear	736479	26981	T3913 x T3921 (B6/129 het x het)
QXT46	C6427	F	Chr4	B6x129X1/SvJ (F1)	KO/KO (F2)	offspring (2)	yes	ear	707121	23432	T09673 x T00869 (B6/129 KO x KO)
QXT47	C6428	F	Chr4	B6x129X1/SvJ (F1)	KO/KO (F2)	offspring (2)	yes	ear	831324	26033	T09673 x T00869 (B6/129 KO x KO)
QXT48	C6429	M	Chr4	B6x129X1/SvJ (F1)	KO/KO (F2)	offspring (2)	yes	ear	726489	25100	T09673 x T00869 (B6/129 KO x KO)
QXT49	C6430	M	Chr4	B6x129X1/SvJ (F1)	KO/KO (F2)	offspring (2)	yes	ear	714570	23845	T09673 x T00869 (B6/129 KO x KO)
QXT50	BA27227	F	Chr4	B6x129X1/SvJ (F2)	KO/KO	ancestors (3)	yes	ear	698731	18855	B6/129 F2 KO/+ x B6/129 F2 KO/+
QXT51	BA27232	M	Chr4	B6x129X1/SvJ (F2)	KO/KO	ancestors (3)	yes	ear	696331	18350	B6/129 F2 KO/+ x B6/129 F2 KO/+
QXT52	C6771	F	Chr2	B6x129/Svx129/Sv-CP	KO/KO	Mice without ancestor control	yes	ear	699602	20453	Chr2-cl KO/+ x KO/+
QXT53	C6773	F	Chr2	B6x129/Svx129/Sv-CP	KO/KO	Mice without ancestor control	yes	ear	781297	22606	Chr2-cl KO/+ x KO/+
QXT54	C6774	F	Chr2	B6x129/Svx129/Sv-CP	WT	Mice without ancestor control	yes	ear	821392	27406	Chr2-cl KO/+ x KO/+
QXT55	C6923	M	Chr4	B6x129X1/SvJ (F2)	KO/KO	offspring (3)	yes	ear	723524	20652	BA27227 x BA27232 (B6/129 F2 KO/+ x KO/KO)
QXT56	C6924	M	Chr4	B6x129X1/SvJ (F2)	KO/KO	offspring (3)	yes	ear	695868	17458	BA27227 x BA27232 (B6/129 F2 KO/+ x KO/KO)
QXT57	C6926	M	Chr4	B6x129X1/SvJ (F2)	KO/KO	offspring (3)	yes	ear	755912	19566	BA27227 x BA27232 (B6/129 F2 KO/+ x KO/KO)
QXT58	C6734	M	Chr2	B6x129/Svx129/Sv-CP	KO/WT	Mice without ancestor control	yes	ear	843761	30733	Chr2-cl KO/+ x KO/+
QXT59	C6735	M	Chr2	B6x129/Svx129/Sv-CP	KO/KO	Mice without ancestor control	yes	ear	830068	25223	Chr2-cl KO/+ x KO/+
QXT60	C6736	M	Chr2	B6x129/Svx129/Sv-CP	WT	Mice without ancestor control	yes	ear	882817	28319	Chr2-cl KO/+ x KO/+
QXT61	C6765	F	Chr4	B6x129X1/SvJ (F2)	KO/KO	offspring (3)	yes	tail	843579	22809	BA27227 x BA27232 (B6/129 F2 KO/+ x KO/KO)
QXT62	C6766	F	Chr2	B6x129/Svx129/Sv-CP	KO/KO	Mice without ancestor control	yes	tail	843617	27378	Chr2-cl KO/+ x KO/+
QXT63	C6733	M	Chr4	B6x129X1/SvJ (F2)	KO/KO	offspring (3)	yes	tail	812911	23391	BA27227 x BA27232 (B6/129 F2 KO/+ x KO/KO)
QXT64	C6768	M	Chr2	B6x129/Svx129/Sv-CP	KO/KO	Mice without ancestor control	yes	tail	872597	30314	Chr2-cl KO/+ x KO/+
QXT65	C7414	F	Chr4	B6x129X1/SvJ (F2)	KO/KO	offspring (3)	yes	tail	808862	20165	BA27227 x BA27232 (B6/129 F2 KO/+ x KO/KO)
QXT66	C7415	F	Chr4	B6x129X1/SvJ (F2)	KO/KO	offspring (3)	yes	tail	800823	22368	BA27227 x BA27232 (B6/129 F2 KO/+ x KO/KO)
QXT67	C7417	F	Chr4	B6x129X1/SvJ (F2)	KO/KO	offspring (3)	yes	tail	810087	22462	BA27227 x BA27232 (B6/129 F2 KO/+ x KO/KO)
QXT68	C6767	F	Chr4	B6x129X1/SvJ (F2)	KO/WT	offspring (3)	yes	tail	793065	19993	BA27227 x BA27232 (B6/129 F2 KO/+ x KO/KO)
QXT69	C6772	F	Chr4	B6x129X1/SvJ (F2)	KO/WT	offspring (3)	yes	tail	799958	18096	BA27227 x BA27232 (B6/129 F2 KO/+ x KO/KO)
QXT70	C6920	F	Chr4	B6x129X1/SvJ (F2)	KO/WT	offspring (3)	yes	tail	794408	20587	BA27227 x BA27232 (B6/129 F2 KO/+ x KO/KO)
QXT71	C6921	F	Chr4	B6x129X1/SvJ (F2)	KO/WT	offspring (3)	yes	tail	790473	20897	BA27227 x BA27232 (B6/129 F2 KO/+ x KO/KO)
QXT72	C6922	F	Chr4	B6x129X1/SvJ (F2)	KO/WT	offspring (3)	yes	tail	763614	19434	BA27227 x BA27232 (B6/129 F2 KO/+ x KO/KO)
QXT73	C6925	F	Chr4	B6x129X1/SvJ (F2)	KO/WT	offspring (3)	yes	tail	865136	24552	BA27227 x BA27232 (B6/129 F2 KO/+ x KO/KO)
QXT74	C6927	M	Chr4	B6x129X1/SvJ (F2)	KO/WT	offspring (3)	yes	tail	810305	22508	BA27227 x BA27232 (B6/129 F2 KO/+ x KO/KO)
QXT75	C7416	F	Chr4	B6x129X1/SvJ (F2)	KO/WT	offspring (3), ancesor (5)	yes	tail	827035	22229	BA27227 x BA27232 (B6/129 F2 KO/+ x KO/KO)
QXT76	BA27228	F	Chr4	B6x129X1/SvJ (F2)	KO/WT	ancestors (4)	yes	tail	734853	19061	n/a
QXT77	BA27084	M	Chr4	B6x129X1/SvJ (F2)	KO/WT	ancestors (4)	yes	tail	770028	24094	n/a
QXT78	C5734	F	Chr4	B6x129X1/SvJ (F2)	KO/KO	offspring (4)	yes	tail	699932	18602	BA2728 x BA27084 (B6/129 F2 KO/+ x KO/+)
QXT79	C7250	M	Chr4	B6x129X1/SvJ (F2)	KO/KO	offspring (4)	yes	tail	663926	19039	BA2728 x BA27084 (B6/129 F2 KO/+ x KO/+)
QXT80	C5733	F	Chr4	B6x129X1/SvJ (F2)	WT	offspring (4)	yes	tail	563472	18214	BA2728 x BA27084 (B6/129 F2 KO/+ x KO/+)
QXT81	C5736	M	Chr4	B6x129X1/SvJ (F2)	WT	offspring (4)	yes	tail	649735	19113	BA2728 x BA27084 (B6/129 F2 KO/+ x KO/+)
QXT82	C5731	F	Chr4	B6x129X1/SvJ (F2)	WT	offspring (4)	yes	tail	725506	17988	BA2728 x BA27084 (B6/129 F2 KO/+ x KO/+)
QXT83	H04408	M	Chr4	B6x129X1/SvJ (F2)	KO/KO	offspring (4)	yes	tail	683833	16724	BA2728 x BA27084 (B6/129 F2 KO/+ x KO/+)
QXT84	H04405	M	Chr4	B6x129X1/SvJ (F2)	WT	offspring (4)	yes	tail	654160	17670	BA2728 x BA27084 (B6/129 F2 KO/+ x KO/+)
QXT85	H032265	M	Chr4	B6x129X1/SvJ (F2)	KO/KO	offspring (4)	yes	tail	673222	19367	BA2728 x BA27084 (B6/129 F2 KO/+ x KO/+)
QXT86	H03384	M	Chr4	B6x129X1/SvJ (F2)	KO/KO (F2)	offspring (3)	yes	tail	635192	15761	C6765 x C6733 (B6/129 F2 KO/KO x KO/KO)
QXT87	H03387	M	Chr4	B6x129X1/SvJ (F2)	KO/KO (F2)	offspring (3)	yes	tail	614973	15723	C6765 x C6733 (B6/129 F2 KO/KO x KO/KO)
QXT88	C6733	M	Chr4	B6x129X1/SvJ (F2)	KO/KO	Organs		testis	709037	20218	BA2727 x BA27232 (B6/129 F2 KO/+ x KO/KO)
QXT89	C6733	M	Chr4	B6x129X1/SvJ (F2)	KO/KO	Organs		brain	681169	19128	BA2727 x BA27232 (B6/129 F2 KO/+ x KO/KO)
QXT90	C6733	M	Chr4	B6x129X1/SvJ (F2)	KO/KO	Organs		blood	701799	19388	BA2727 x BA27232 (B6/129 F2 KO/+ x KO/KO)
QXT91	C6733	M	Chr4	B6x129X1/SvJ (F2)	KO/KO	Organs		kidney	699356	19587	BA2727 x BA27232 (B6/129 F2 KO/+ x KO/KO)
QXT92	C7249	M	Chr4	B6x129X1/SvJ (F2)	KO/WT	Offspring (4), Ancestors (5)	yes	tail	634925	16659	BA2728 x BA27084 (B6/129 F2 KO/+ x KO/+)
QXT93	C7416	F	Chr4	B6x129X1/SvJ (F2)	KO/WT	Replicate (QXT75)		tail (adult)	625997	16527	BA27227 x BA27232 (B6/129 F2 KO/+ x KO/KO)
QXT94	M05139	F	Chr4	B6x129X1/SvJ (F2)	WT	offspring (5)	yes	tail	647468	16369	C7416 x C7249 (B6/129 F2 KO/+ x KO/+)
QXT95	M05141	M	Chr4	B6x129X1/SvJ (F2)	WT	offspring (5)	yes	tail	615968	15480	C7416 x C7249 (B6/129 F2 KO/+ x KO/+)
QXT96	M05667	M	Chr4	B6x129X1/SvJ (F2)	WT	offspring (5)	yes	tail	652214	15796	C7416 x C7249 (B6/129 F2 KO/+ x KO/+)
QXT97	M05669	M	Chr4	B6x129X1/SvJ (F2)	WT	offspring (5)	yes	tail	580349	15571	C7416 x C7249 (B6/129 F2 KO/+ x KO/+)
QXT98	M05137	F	Chr4	B6x129X1/SvJ (F2)	KO/KO	offspring (5)	yes	tail	663371	16350	C7416 x C7249 (B6/129 F2 KO/+ x KO/+)
QXT99	M05143	M	Chr4	B6x129X1/SvJ (F2)	KO/KO	offspring (5)	yes	tail	607211	15323	C7416 x C7249 (B6/129 F2 KO/+ x KO/+)
QXT100	M05666	F	Chr4	B6x129X1/SvJ (F2)	KO/KO	offspring (5)	yes	tail	685703	17642	C7416 x C7249 (B6/129 F2 KO/+ x KO/+)
QXT101	M05668	M	Chr4	B6x129X1/SvJ (F2)	KO/KO	offspring (5)	yes	tail	690300	20324	C7416 x C7249 (B6/129 F2 KO/+ x KO/+)
QXT102	C6733	M	Chr4	B6x129X1/SvJ (F2)	KO/KO	Replicate (QXT63)		tail (adult)	686557	19278	BA27227 x BA27232 (B6/129 F2 KO/+ x KO/KO)
QXT103	C6733 (replicate)	M	Chr4	B6x129X1/SvJ (F2)	KO/KO	Replicate (QXT88)		testes	667051	19099	BA27227 x BA27232 (B6/129 F2 KO/+ x KO/KO)
QXT104	C7415 (replicate)	F	Chr4	B6x129X1/SvJ (F2)	KO/KO	Replicate (QXT66)		tail	626494	17056	BA27227 x BA27232 (B6/129 F2 KO/+ x KO/KO)
QXT105	C5734 (replicate)	F	Chr4	B6x129X1/SvJ (F2)	KO/KO	Replicate (QXT78)		tail	685895	17968	BA2728 x BA27084 (B6/129 F2 KO/+ x KO/+)
QXT106	C5731 (replicate)	F	Chr4	B6x129X1/SvJ (F2)	WT	Replicate (QXT82)		tail	699640	18319	BA2728 x BA27084 (B6/129 F2 KO/+ x KO/+)
QXT107	H03387 (replicate)	M	Chr4	B6x129X1/SvJ (F2)	KO/KO (F2)	Replicate (QXT87)		tail	633447	17144	C6765 x C6733 (B6/129 F2 KO/KO x KO/KO)
